# Supplementary material for: Identification of immune-associated genes with altered expression in the spleen of mice enriched with probiotic Lactobacillus species using RNA-seq profiling
Source: PubMed Central journal article supplement (PMC11725755; doi:10.5713/ab.24.0280), 2024-08-26
Supplement: ab-24-0280-Supplementary-Fig-1.pdf [file ab-24-0280-Supplementary-Fig-1.pdf]

Supplementary Figure S1

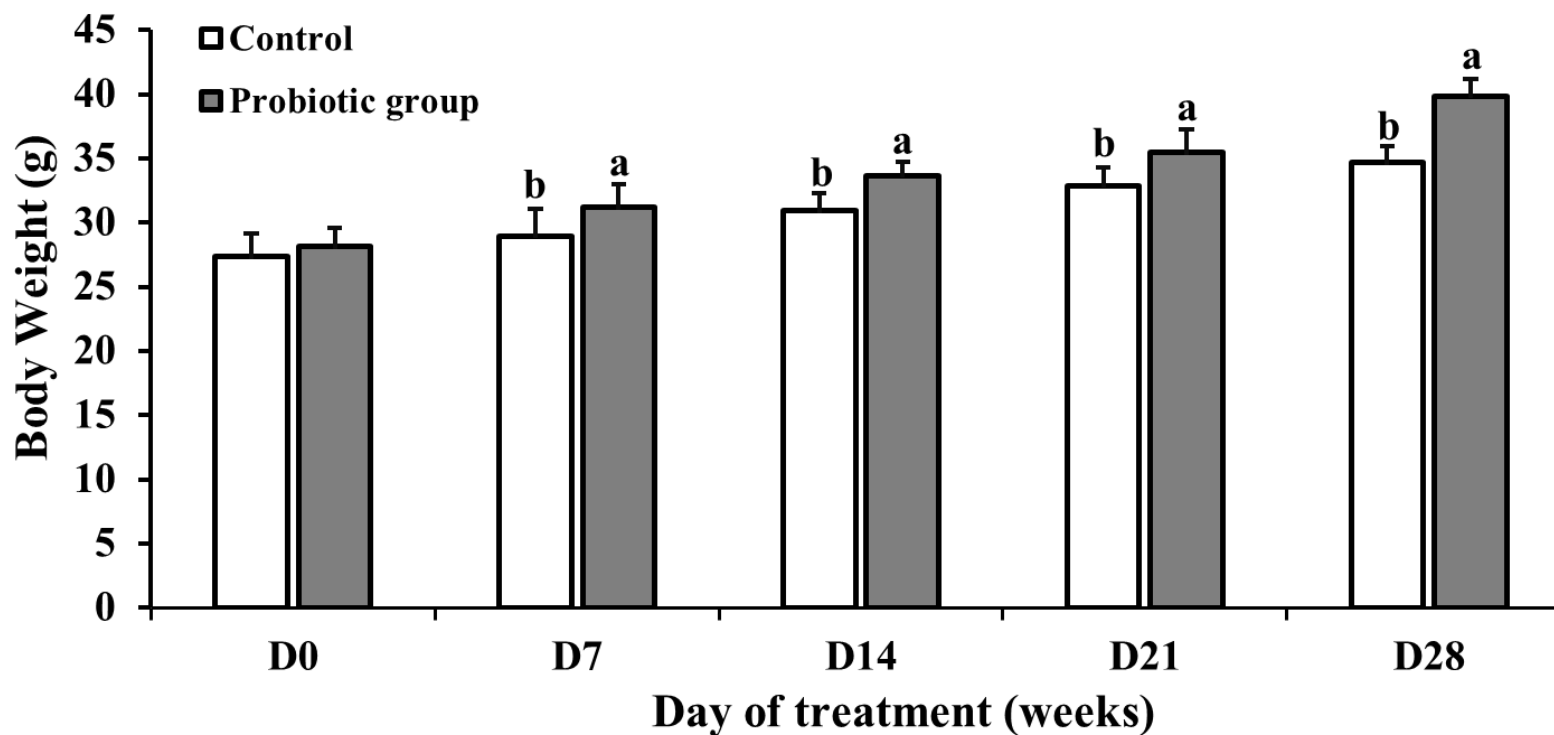

Supplementary Table S1

|                     | Control D14   |               |               | Control D28   |               |               | Treatment D14 |               |               | Treatment D28 |               |               |
|---------------------|---------------|---------------|---------------|---------------|---------------|---------------|---------------|---------------|---------------|---------------|---------------|---------------|
|                     | M01           | M02           | M03           | M07           | M08           | M09           | M14           | M15           | M16           | M22           | M24           | M25           |
| <b>Raw data</b>     |               |               |               |               |               |               |               |               |               |               |               |               |
| Total Reads         | 43.199.982    | 55.730.236    | 53.744.910    | 56.381.812    | 53.241.122    | 52.618.524    | 49.116.450    | 50.564.288    | 42.920.088    | 54.506.964    | 40.844.894    | 52.567.406    |
| Total Bases         | 6.479.997.300 | 8.359.535.400 | 8.061.736.500 | 8.457.271.800 | 7.986.168.300 | 7.892.778.600 | 7.367.467.500 | 7.584.643.200 | 6.438.013.200 | 8.176.044.600 | 6.126.734.100 | 7.885.110.900 |
| Q20 (%)             | 96,79         | 96,71         | 95,87         | 96,43         | 96,44         | 96,42         | 96,46         | 96,45         | 96,44         | 96,45         | 94,2          | 96,31         |
| Q30 (%)             | 92,62         | 92,22         | 90,45         | 91,97         | 92,3          | 92,27         | 92,14         | 92,2          | 92,14         | 92,18         | 86,7          | 92,02         |
| GC (%)              | 56,63         | 56,6          | 57,02         | 57,54         | 57,94         | 57,03         | 57,33         | 56,59         | 56,65         | 57,76         | 54,79         | 56,45         |
| N (ppm)             | 5,16          | 4,7           | 4,12          | 4,87          | 4,69          | 4,81          | 4,96          | 4,83          | 4,95          | 4,65          | 2,91          | 4,81          |
| <b>Cleaned data</b> |               |               |               |               |               |               |               |               |               |               |               |               |
| Reads               | 42.911.552    | 48.823.098    | 50.244.036    | 42.643.596    | 55.395.602    | 54.159.132    | 40.657.866    | 52.214.908    | 53.423.404    | 56.031.206    | 52.918.544    | 52.237.852    |
