# Supplementary material for: Identification of immune-associated genes with altered expression in the spleen of mice enriched with probiotic Lactobacillus species using RNA-seq profiling
Source: PubMed Central journal article supplement (PMC11725755; doi:10.5713/ab.24.0280), 2024-08-26
Supplement: ab-24-0280-Supplementary-Table-1.pdf [file ab-24-0280-Supplementary-Table-1.pdf]

Supplementary Figure S1

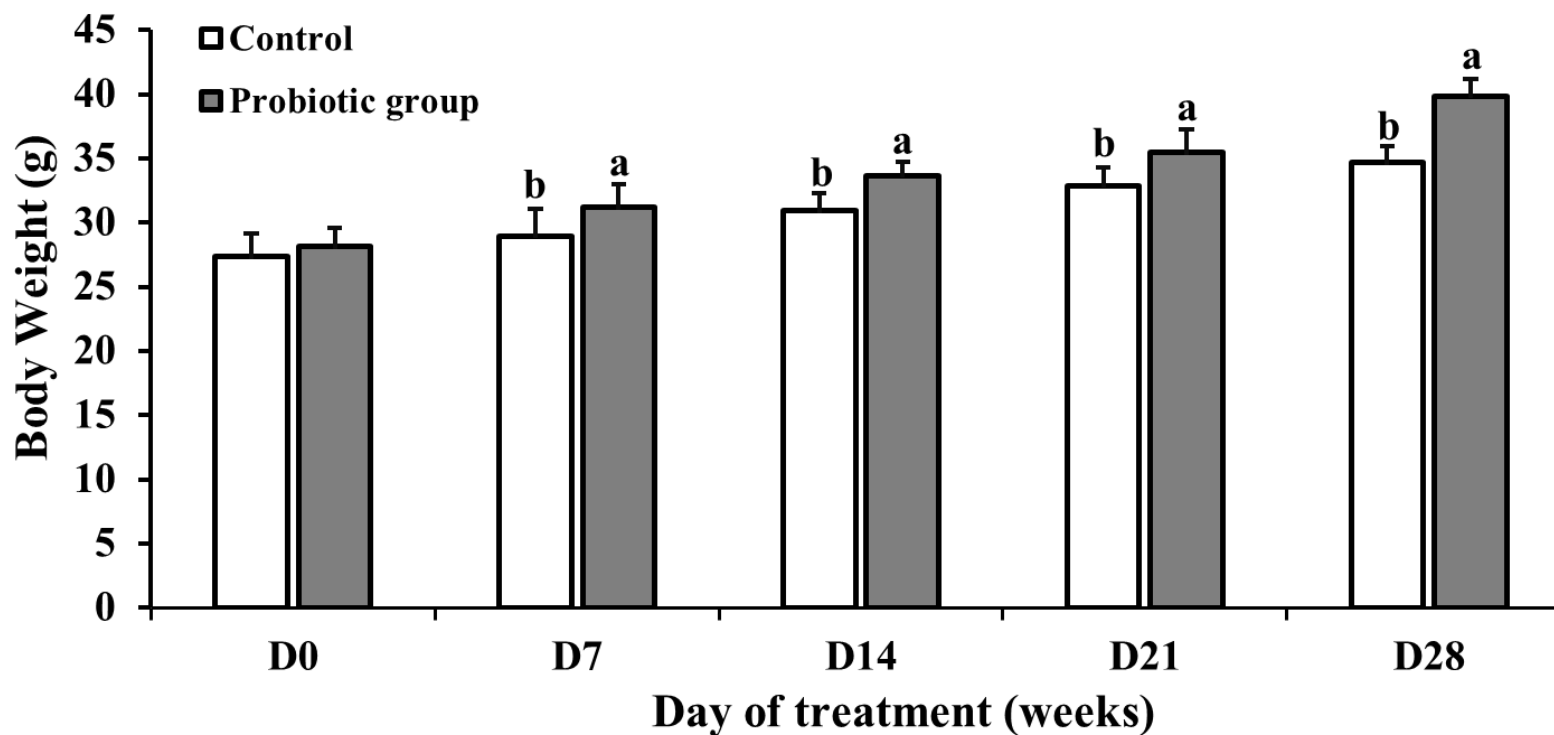

Supplementary Table S1

|                     | Control D14   |               |               | Control D28   |               |               | Treatment D14 |               |               | Treatment D28 |               |               |
|---------------------|---------------|---------------|---------------|---------------|---------------|---------------|---------------|---------------|---------------|---------------|---------------|---------------|
|                     | M01           | M02           | M03           | M07           | M08           | M09           | M14           | M15           | M16           | M22           | M24           | M25           |
| <b>Raw data</b>     |               |               |               |               |               |               |               |               |               |               |               |               |
| Total Reads         | 43.199.982    | 55.730.236    | 53.744.910    | 56.381.812    | 53.241.122    | 52.618.524    | 49.116.450    | 50.564.288    | 42.920.088    | 54.506.964    | 40.844.894    | 52.567.406    |
| Total Bases         | 6.479.997.300 | 8.359.535.400 | 8.061.736.500 | 8.457.271.800 | 7.986.168.300 | 7.892.778.600 | 7.367.467.500 | 7.584.643.200 | 6.438.013.200 | 8.176.044.600 | 6.126.734.100 | 7.885.110.900 |
| Q20 (%)             | 96,79         | 96,71         | 95,87         | 96,43         | 96,44         | 96,42         | 96,46         | 96,45         | 96,44         | 96,45         | 94,2          | 96,31         |
| Q30 (%)             | 92,62         | 92,22         | 90,45         | 91,97         | 92,3          | 92,27         | 92,14         | 92,2          | 92,14         | 92,18         | 86,7          | 92,02         |
| GC (%)              | 56,63         | 56,6          | 57,02         | 57,54         | 57,94         | 57,03         | 57,33         | 56,59         | 56,65         | 57,76         | 54,79         | 56,45         |
| N (ppm)             | 5,16          | 4,7           | 4,12          | 4,87          | 4,69          | 4,81          | 4,96          | 4,83          | 4,95          | 4,65          | 2,91          | 4,81          |
| <b>Cleaned data</b> |               |               |               |               |               |               |               |               |               |               |               |               |
| Reads               | 42.911.552    | 48.823.098    | 50.244.036    | 42.643.596    | 55.395.602    | 54.159.132    | 40.657.866    | 52.214.908    | 53.423.404    | 56.031.206    | 52.918.544    | 52.237.852    |

|                 |                        |                        |                        |                        |                        |                        |                        |                        |                        |                        |                        |                        |
|-----------------|------------------------|------------------------|------------------------|------------------------|------------------------|------------------------|------------------------|------------------------|------------------------|------------------------|------------------------|------------------------|
| Bases           | 6.410.435.567          | 7.288.621.586          | 7.498.738.773          | 6.365.193.942          | 8.274.715.290          | 8.083.387.968          | 6.062.230.310          | 7.785.794.505          | 7.970.655.664          | 8.362.032.636          | 7.896.179.239          | 7.796.134.469          |
| Q20 (%)         | 97,19                  | 96,89                  | 96,9                   | 96,89                  | 97,09                  | 96,91                  | 94,66                  | 96,86                  | 96,34                  | 96,89                  | 96,91                  | 96,92                  |
| Q30 (%)         | 93,09                  | 92,63                  | 92,73                  | 92,65                  | 92,66                  | 92,71                  | 87,18                  | 92,64                  | 90,99                  | 92,49                  | 92,84                  | 92,85                  |
| GC (%)          | 93,09                  | 92,63                  | 92,73                  | 92,65                  | 92,66                  | 92,71                  | 87,18                  | 92,64                  | 90,99                  | 92,49                  | 92,84                  | 92,85                  |
| N (ppm)         | 2,92                   | 2,97                   | 2,94                   | 2,84                   | 2,91                   | 2,99                   | 1,59                   | 2,98                   | 2,58                   | 2,94                   | 2,98                   | 2,93                   |
| <b>Mapped</b>   |                        |                        |                        |                        |                        |                        |                        |                        |                        |                        |                        |                        |
| Exon (%)        | 51,15                  | 53,13                  | 55,62                  | 49,95                  | 48,99                  | 48,7                   | 52,47                  | 52,62                  | 53,55                  | 47,68                  | 58,3                   | 47,96                  |
| Intergenic (%)  | 12,72                  | 11,03                  | 11,04                  | 14,11                  | 13,25                  | 11                     | 14,59                  | 12,22                  | 13,82                  | 13,82                  | 12,78                  | 11,56                  |
| Intron (%)      | 36,23                  | 35,84                  | 33,34                  | 36,44                  | 37,76                  | 40,3                   | 32,94                  | 35,16                  | 32,63                  | 38,5                   | 28,92                  | 40,68                  |
| Total mapped    | 26.707.292<br>(62.23%) | 34.847.313<br>(62.90%) | 32.588.280<br>(61%)    | 33.280.729<br>(59.39%) | 30.269.745<br>(57.20%) | 32.634.769<br>(62.47%) | 29.377.573<br>(60.17%) | 31.169.424<br>(62.03%) | 26.059.418<br>(61.10%) | 32.284.297<br>(59.61%) | 27.778.206<br>(68.32%) | 32.419.427<br>(62.08%) |
| Multiple mapped | 4.456.633<br>(10.38%)  | 6.453.548<br>(11.64%)  | 6.521.408<br>(12.20%)  | 5.427.444<br>(9.68%)   | 5.202.060<br>(9.83%)   | 6.048.032<br>(11.57%)  | 4.044.075<br>(8.28%)   | 4.649.951<br>(9.25%)   | 3.483.276<br>(8.16%)   | 5.094.525<br>(9.40%)   | 3.007.180<br>(7.39%)   | 5.996.718<br>(11.48%)  |
| Uniquely mapped | 22.250.659<br>(51.85%) | 28.393.765<br>(51.25%) | 26.066.872<br>(48.79%) | 27.853.285<br>(49.71%) | 25.067.685<br>(47.37%) | 26.586.737<br>(50.89%) | 25.333.498<br>(51.88%) | 26.519.473<br>(52.78%) | 22.576.142<br>(52.94%) | 27.189.772<br>(50.20%) | 24.771.026<br>(60.92%) | 26.422.709<br>(50.60%) |
| Number of Genes | 25177                  | 32609                  | 25476                  | 30792                  | 27904                  | 25754                  | 29880                  | 32003                  | 29509                  | 30919                  | 28839                  | 24828                  |

## Supplementary Table S2A

| No | log2FoldChange       | Regulation | pvalue     | GeneSymbol | Description                                                                      |
|----|----------------------|------------|------------|------------|----------------------------------------------------------------------------------|
| 1  | -10,816,970,187,416  | Down       | 0.0005376  | Adrb2      | adrenergic receptor%2C beta 2 [MGI:87938]                                        |
| 2  | -483,417,119,767,682 | Down       | 1.45E-02   | Ank1       | ankyrin 1%2C erythroid [MGI:88024]                                               |
| 3  | -144,527,681,797,704 | Down       | 1.22E-05   | Arrb1      | arrestin%2C beta 1 [MGI:99473]                                                   |
| 4  | -325,069,705,693,279 | Down       | 0.00010329 | Asic5      | acid-sensing (proton-gated) ion channel family member 5 [MGI:1929259]            |
| 5  | -160,266,512,503,945 | Down       | 2.81E-02   | Atp2b4     | ATPase%2C Ca++ transporting%2C plasma membrane 4 [MGI:88111]                     |
| 6  | -343,380,632,049,089 | Down       | 0.000127   | Cacna1g    | calcium channel%2C voltage-dependent%2C T type%2C alpha 1G subunit [MGI:1201678] |
| 7  | -241,922,854,405,425 | Down       | 0.003353   | Ccl28      | chemokine (C-C motif) ligand 28 [MGI:1861731]                                    |
| 8  | -214,632,537,480,107 | Down       | 8.49E-29   | Ccl1       | chemokine (C-C motif) ligand 1 [MGI:98258]                                       |
| 9  | -112,781,139,803,128 | Down       | 2.37E+07   | Cxcl2      | chemokine (C-X-C motif) ligand 2 [MGI:1340094]                                   |
| 10 | 13,450,487,601,445   | Ups        | 0.026989   | Cxcl5      | chemokine (C-X-C motif) ligand 5 [MGI:1096868]                                   |
| 11 | 20,382,068,070,276   | Ups        | 5.99E+09   | Ccl24      | chemokine (C-C motif) ligand 24 [MGI:1928953]                                    |
| 12 | 113,220,977,396,178  | Ups        | 0.000435   | Ccl19      | chemokine (C-C motif) ligand 19 [MGI:1346316]                                    |
| 13 | 115,043,957,321,004  | Ups        | 2.58E-03   | Cxcr6      | chemokine (C-X-C motif) receptor 6 [MGI:1934582]                                 |
| 14 | 116,400,312,581,627  | Ups        | 1.08E+00   | Xcl1       | chemokine (C motif) ligand 1 [MGI:104593]                                        |
| 15 | 116,847,167,025,075  | Ups        | 0.01569    | Ccl17      | chemokine (C-C motif) ligand 17 [MGI:1329039]                                    |
| 16 | 117,613,726,547,613  | Ups        | 0.0001170  | Ccl5       | chemokine (C-C motif) ligand 5 [MGI:98262]                                       |
| 17 | 117,613,726,547,613  | Ups        | 1.05E+08   | Ccl5       | chemokine (C-C motif) ligand 5 [MGI:98262]                                       |
| 18 | 122,876,839,245,862  | Ups        | 3.43E+09   | Cxcl11     | chemokine (C-X-C motif) ligand 11 [MGI:1860203]                                  |
