# Supplementary material for: Identification of immune-associated genes with altered expression in the spleen of mice enriched with probiotic Lactobacillus species using RNA-seq profiling
Source: PubMed Central journal article supplement (PMC11725755; doi:10.5713/ab.24.0280), 2024-08-26
Supplement: ab-24-0280-Supplementary-Table-2.pdf [file ab-24-0280-Supplementary-Table-2.pdf]

|                 |                        |                        |                        |                        |                        |                        |                        |                        |                        |                        |                        |                        |
|-----------------|------------------------|------------------------|------------------------|------------------------|------------------------|------------------------|------------------------|------------------------|------------------------|------------------------|------------------------|------------------------|
| Bases           | 6.410.435.567          | 7.288.621.586          | 7.498.738.773          | 6.365.193.942          | 8.274.715.290          | 8.083.387.968          | 6.062.230.310          | 7.785.794.505          | 7.970.655.664          | 8.362.032.636          | 7.896.179.239          | 7.796.134.469          |
| Q20 (%)         | 97,19                  | 96,89                  | 96,9                   | 96,89                  | 97,09                  | 96,91                  | 94,66                  | 96,86                  | 96,34                  | 96,89                  | 96,91                  | 96,92                  |
| Q30 (%)         | 93,09                  | 92,63                  | 92,73                  | 92,65                  | 92,66                  | 92,71                  | 87,18                  | 92,64                  | 90,99                  | 92,49                  | 92,84                  | 92,85                  |
| GC (%)          | 93,09                  | 92,63                  | 92,73                  | 92,65                  | 92,66                  | 92,71                  | 87,18                  | 92,64                  | 90,99                  | 92,49                  | 92,84                  | 92,85                  |
| N (ppm)         | 2,92                   | 2,97                   | 2,94                   | 2,84                   | 2,91                   | 2,99                   | 1,59                   | 2,98                   | 2,58                   | 2,94                   | 2,98                   | 2,93                   |
| <b>Mapped</b>   |                        |                        |                        |                        |                        |                        |                        |                        |                        |                        |                        |                        |
| Exon (%)        | 51,15                  | 53,13                  | 55,62                  | 49,95                  | 48,99                  | 48,7                   | 52,47                  | 52,62                  | 53,55                  | 47,68                  | 58,3                   | 47,96                  |
| Intergenic (%)  | 12,72                  | 11,03                  | 11,04                  | 14,11                  | 13,25                  | 11                     | 14,59                  | 12,22                  | 13,82                  | 13,82                  | 12,78                  | 11,56                  |
| Intron (%)      | 36,23                  | 35,84                  | 33,34                  | 36,44                  | 37,76                  | 40,3                   | 32,94                  | 35,16                  | 32,63                  | 38,5                   | 28,92                  | 40,68                  |
| Total mapped    | 26.707.292<br>(62.23%) | 34.847.313<br>(62.90%) | 32.588.280<br>(61%)    | 33.280.729<br>(59.39%) | 30.269.745<br>(57.20%) | 32.634.769<br>(62.47%) | 29.377.573<br>(60.17%) | 31.169.424<br>(62.03%) | 26.059.418<br>(61.10%) | 32.284.297<br>(59.61%) | 27.778.206<br>(68.32%) | 32.419.427<br>(62.08%) |
| Multiple mapped | 4.456.633<br>(10.38%)  | 6.453.548<br>(11.64%)  | 6.521.408<br>(12.20%)  | 5.427.444<br>(9.68%)   | 5.202.060<br>(9.83%)   | 6.048.032<br>(11.57%)  | 4.044.075<br>(8.28%)   | 4.649.951<br>(9.25%)   | 3.483.276<br>(8.16%)   | 5.094.525<br>(9.40%)   | 3.007.180<br>(7.39%)   | 5.996.718<br>(11.48%)  |
| Uniquely mapped | 22.250.659<br>(51.85%) | 28.393.765<br>(51.25%) | 26.066.872<br>(48.79%) | 27.853.285<br>(49.71%) | 25.067.685<br>(47.37%) | 26.586.737<br>(50.89%) | 25.333.498<br>(51.88%) | 26.519.473<br>(52.78%) | 22.576.142<br>(52.94%) | 27.189.772<br>(50.20%) | 24.771.026<br>(60.92%) | 26.422.709<br>(50.60%) |
| Number of Genes | 25177                  | 32609                  | 25476                  | 30792                  | 27904                  | 25754                  | 29880                  | 32003                  | 29509                  | 30919                  | 28839                  | 24828                  |

## Supplementary Table S2A

| No | log2FoldChange       | Regulation | pvalue     | GeneSymbol | Description                                                                      |
|----|----------------------|------------|------------|------------|----------------------------------------------------------------------------------|
| 1  | -10,816,970,187,416  | Down       | 0.0005376  | Adrb2      | adrenergic receptor%2C beta 2 [MGI:87938]                                        |
| 2  | -483,417,119,767,682 | Down       | 1.45E-02   | Ank1       | ankyrin 1%2C erythroid [MGI:88024]                                               |
| 3  | -144,527,681,797,704 | Down       | 1.22E-05   | Arrb1      | arrestin%2C beta 1 [MGI:99473]                                                   |
| 4  | -325,069,705,693,279 | Down       | 0.00010329 | Asic5      | acid-sensing (proton-gated) ion channel family member 5 [MGI:1929259]            |
| 5  | -160,266,512,503,945 | Down       | 2.81E-02   | Atp2b4     | ATPase%2C Ca++ transporting%2C plasma membrane 4 [MGI:88111]                     |
| 6  | -343,380,632,049,089 | Down       | 0.000127   | Cacna1g    | calcium channel%2C voltage-dependent%2C T type%2C alpha 1G subunit [MGI:1201678] |
| 7  | -241,922,854,405,425 | Down       | 0.003353   | Ccl28      | chemokine (C-C motif) ligand 28 [MGI:1861731]                                    |
| 8  | -214,632,537,480,107 | Down       | 8.49E-29   | Ccl1       | chemokine (C-C motif) ligand 1 [MGI:98258]                                       |
| 9  | -112,781,139,803,128 | Down       | 2.37E+07   | Cxcl2      | chemokine (C-X-C motif) ligand 2 [MGI:1340094]                                   |
| 10 | 13,450,487,601,445   | Ups        | 0.026989   | Cxcl5      | chemokine (C-X-C motif) ligand 5 [MGI:1096868]                                   |
| 11 | 20,382,068,070,276   | Ups        | 5.99E+09   | Ccl24      | chemokine (C-C motif) ligand 24 [MGI:1928953]                                    |
| 12 | 113,220,977,396,178  | Ups        | 0.000435   | Ccl19      | chemokine (C-C motif) ligand 19 [MGI:1346316]                                    |
| 13 | 115,043,957,321,004  | Ups        | 2.58E-03   | Cxcr6      | chemokine (C-X-C motif) receptor 6 [MGI:1934582]                                 |
| 14 | 116,400,312,581,627  | Ups        | 1.08E+00   | Xcl1       | chemokine (C motif) ligand 1 [MGI:104593]                                        |
| 15 | 116,847,167,025,075  | Ups        | 0.01569    | Ccl17      | chemokine (C-C motif) ligand 17 [MGI:1329039]                                    |
| 16 | 117,613,726,547,613  | Ups        | 0.0001170  | Ccl5       | chemokine (C-C motif) ligand 5 [MGI:98262]                                       |
| 17 | 117,613,726,547,613  | Ups        | 1.05E+08   | Ccl5       | chemokine (C-C motif) ligand 5 [MGI:98262]                                       |
| 18 | 122,876,839,245,862  | Ups        | 3.43E+09   | Cxcl11     | chemokine (C-X-C motif) ligand 11 [MGI:1860203]                                  |

| No | log2FoldChange       | Regulation | pvalue    | GeneSymbol | Description                                                                                           |
|----|----------------------|------------|-----------|------------|-------------------------------------------------------------------------------------------------------|
| 19 | 124,406,146,179,967  | Ups        | 7.81E+07  | Cxcl10     | chemokine (C-X-C motif) ligand 10 [MGI:1352450]                                                       |
| 20 | 125,177,214,306,982  | Ups        | 2.90E+04  | Ccl7       | chemokine (C-C motif) ligand 7 [MGI:99512]                                                            |
| 21 | 148,822,594,240,585  | Ups        | 1.37E+09  | Ccl4       | chemokine (C-C motif) ligand 4 [MGI:98261]                                                            |
| 22 | 150,841,866,476,315  | Ups        | 0.0002512 | Ccr5       | chemokine (C-C motif) receptor 5 [MGI:107182]                                                         |
| 23 | 150,841,866,476,315  | Ups        | 0.0189967 | Ccr5       | chemokine (C-C motif) receptor 5 [MGI:107182]                                                         |
| 24 | 156,939,248,347,876  | Ups        | 0.0032476 | Cxcl9      | chemokine (C-X-C motif) ligand 9 [MGI:1352449]                                                        |
| 25 | 162,786,819,626,243  | Ups        | 7.73E-16  | Cxcr1      | chemokine (C-X-C motif) receptor 1 [MGI:2448715]                                                      |
| 26 | 162,786,819,626,243  | Ups        | 0.002035  | Ccr11      | chemokine (C-C motif) receptor 1-like 1 [MGI:104617]                                                  |
| 27 | 170,789,845,406,505  | Ups        | 2.89E+07  | Ccr4       | chemokine (C-C motif) receptor 4 [MGI:107824]                                                         |
| 28 | 208,591,742,387,313  | Ups        | 0.001313  | Cxcl1      | chemokine (C-X-C motif) ligand 1 [MGI:108068]                                                         |
| 29 | 208,591,742,387,313  | Ups        | 6.77E+09  | Cxcl1      | chemokine (C-X-C motif) ligand 1 [MGI:108068]                                                         |
| 30 | 273,564,247,573,611  | Ups        | 0.005798  | Ccr10      | chemokine (C-C motif) receptor 10 [MGI:1096320]                                                       |
| 31 | -15,371,652,903,832  | Down       | 9.99E+03  | Ccnb1      | cyclin B1 [MGI:88302]                                                                                 |
| 32 | -20,474,871,582,078  | Down       | 1.02E-05  | Ccnb2      | cyclin B2 [MGI:88311]                                                                                 |
| 33 | -256,347,836,955,174 | Down       | 1.63E+08  | Ccne1      | cyclin E1 [MGI:88316]                                                                                 |
| 34 | -210,805,588,839,721 | Down       | 6.09E+00  | Ccne2      | cyclin E2 [MGI:1329034]                                                                               |
| 35 | -116,963,989,627,878 | Down       | 1.01E+09  | Cd1d2      | CD1d2 antigen [MGI:107675]                                                                            |
| 36 | 269,341,761,322,336  | Ups        | 5.60E-03  | Cd209e     | CD209e antigen [MGI:2157948]                                                                          |
| 37 | -187,465,718,291,774 | Down       | 4.75E+07  | Cd209f     | CD209f antigen [MGI:1916392]                                                                          |
| 38 | -112,781,139,803,128 | Down       | 0.010773  | Cd209g     | CD209g antigen [MGI:1917442]                                                                          |
| 39 | 119,758,325,880,075  | Ups        | 5.28E+08  | Cd22       | CD22 antigen [MGI:88322]                                                                              |
| 40 | 119,758,325,880,075  | Ups        | 0.002727  | Cd22       | CD22 antigen [MGI:88322]                                                                              |
| 41 | 143,210,544,215,653  | Ups        | 5.41E+08  | Cd274      | CD274 antigen [MGI:1926446]                                                                           |
| 42 | 112,232,171,827,061  | Ups        | 0.000315  | Cd3e       | CD3 antigen%2C epsilon polypeptide [MGI:88332]                                                        |
| 43 | 112,232,171,827,061  | Ups        | 0.000492  | Cd3e       | CD3 antigen%2C epsilon polypeptide [MGI:88332]                                                        |
| 44 | 111,441,055,724,983  | Ups        | 1.63E+02  | Cd8a       | CD8 antigen%2C alpha chain [MGI:88346]                                                                |
| 45 | 125,198,326,895,244  | Ups        | 0.0001031 | Cd8b1      | CD8 antigen%2C beta chain 1 [MGI:88347]                                                               |
| 46 | -280,245,363,060,942 | Down       | 4.72E-29  | Cdc25b     | cell division cycle 25B [MGI:99701]                                                                   |
| 47 | -18,355,247,747,655  | Down       | 2.27E+00  | Cdk1       | cyclin-dependent kinase 1 [MGI:88351]                                                                 |
| 48 | -132,676,514,890,766 | Down       | 5.80E+06  | Cdkn2c     | cyclin dependent kinase inhibitor 2C [MGI:105388]                                                     |
| 49 | -153,647,820,458,351 | Down       | 1.81E+04  | Cdkn2d     | cyclin dependent kinase inhibitor 2D [MGI:105387]                                                     |
| 50 | -19,730,739,152,301  | Down       | 0.0001028 | Chek1      | checkpoint kinase 1 [MGI:1202065]                                                                     |
| 51 | -481,014,411,117,811 | Down       | 0.001707  | Cldn13     | claudin 13 [MGI:1913102]                                                                              |
| 52 | 110,689,049,484,825  | Ups        | 1.12E+07  | Csf2rb     | colony stimulating factor 2 receptor%2C beta%2C low-affinity (granulocyte-macrophage) [MGI:1339759]   |
| 53 | 130,101,879,232,537  | Ups        | 0.000733  | Csf2rb2    | colony stimulating factor 2 receptor%2C beta 2%2C low-affinity (granulocyte-macrophage) [MGI:1339760] |
| 54 | 111,664,005,416,347  | Ups        | 0.0020476 | Csf3r      | colony stimulating factor 3 receptor (granulocyte) [MGI:1339755]                                      |
| 55 | -182,558,204,776,813 | Down       | 9.46E+07  | Dusp8      | dual specificity phosphatase 8 [MGI:106626]                                                           |
| 56 | -160,469,510,558,477 | Down       | 1.22E+08  | E2f1       | E2F transcription factor 1 [MGI:101941]                                                               |
| 57 | -290,339,428,310,646 | Down       | 8.88E-40  | E2f2       | E2F transcription factor 2 [MGI:1096341]                                                              |
| 58 | 106,085,346,799,704  | Ups        | 0.000155  | Elmo1      | engulfment and cell motility 1 [MGI:2153044]                                                          |

| No | log2FoldChange       | Regulation | pvalue    | GeneSymbol | Description                                                  |
|----|----------------------|------------|-----------|------------|--------------------------------------------------------------|
| 59 | -249,505,631,846,327 | Down       | 9.47E-06  | Epor       | erythropoietin receptor [MGI:95408]                          |
| 60 | -178,022,437,573,859 | Down       | 1.42E+04  | Fabp1      | fatty acid binding protein 1%2C liver [MGI:95479]            |
| 61 | -10,311,790,637,486  | Down       | 0.000232  | Fabp2      | fatty acid binding protein 2%2C intestinal [MGI:95478]       |
| 62 | -165,762,068,924,723 | Down       | 0.001192  | Fabp5      | fatty acid binding protein 5%2C epidermal [MGI:101790]       |
| 63 | 200,898,437,183,393  | Ups        | 0.001468  | Fgf21      | fibroblast growth factor 21 [MGI:1861377]                    |
| 64 | -482,205,864,873,027 | Down       | 5.20E+07  | Gfap       | glial fibrillary acidic protein [MGI:95697]                  |
| 65 | -853,289,592,018,369 | Down       | 0.002381  | Gm5771     | predicted gene 5771 [MGI:3646222]                            |
| 66 | -128,059,986,363,921 | Down       | 0.0035723 | Gtse1      | G two S phase expressed protein 1 [MGI:1352755]              |
| 67 | 104,066,515,617,428  | Ups        | 2.98E+08  | H2-DMa     | histocompatibility 2%2C class II%2C locus DMa [MGI:95921]    |
| 68 | 189,601,373,568,703  | Ups        | 0.000506  | H2-Eb2     | histocompatibility 2%2C class II antigen E beta2 [MGI:95902] |
| 69 | 112,039,646,665,143  | Ups        | 0.0001015 | H2-Q4      | histocompatibility 2%2C Q region locus 4 [MGI:95933]         |
| 70 | 140,380,121,256,121  | Ups        | 4.78E+09  | H2-Q6      | histocompatibility 2%2C Q region locus 6 [MGI:95935]         |
| 71 | -11,093,310,508,799  | Down       | 7.52E+09  | Hbegf      | heparin-binding EGF-like growth factor [MGI:96070]           |
| 72 | -183,571,877,542,961 | Down       | 6.75E-01  | Hmmr       | hyaluronan mediated motility receptor (RHAMM) [MGI:104667]   |
| 73 | 122,982,285,788,749  | Ups        | 0.032189  | Ifi205     | interferon activated gene 205 [MGI:101847]                   |
| 74 | 113,686,099,434,364  | Ups        | 0.0009283 | Ifi211     | interferon activated gene 211 [MGI:3041120]                  |
| 75 | 168,109,598,074,735  | Ups        | 0.00391   | Ifnk       | interferon kappa [MGI:2683287]                               |
| 76 | 134,251,419,581,982  | Ups        | 2.84E+06  | Il10       | interleukin 10 [MGI:96537]                                   |
| 77 | -112,781,139,803,128 | Down       | 2.20E-58  | Il1ra2     | interleukin 11 receptor%2C alpha chain 2 [MGI:109123]        |
| 78 | -107,338,639,321,485 | Down       | 0.03074   | Il17d      | interleukin 17D [MGI:2446510]                                |
| 79 | 126,642,230,201,673  | Ups        | 2.36E+08  | Il18r1     | interleukin 18 receptor 1 [MGI:105383]                       |
| 80 | 120,258,689,091,241  | Ups        | 0.003767  | Il18rap    | interleukin 18 receptor accessory protein [MGI:1338888]      |
| 81 | 120,258,689,091,241  | Ups        | 3.52E+04  | Il18rap    | interleukin 18 receptor accessory protein [MGI:1338888]      |
| 82 | 122,899,081,969,256  | Ups        | 4.45E+00  | Il1a       | interleukin 1 alpha [MGI:96542]                              |
| 83 | -188,637,578,938,601 | Down       | 0.000149  | Il1rl1     | interleukin 1 receptor-like 1 [MGI:98427]                    |
| 84 | -188,637,578,938,601 | Down       | 0.005873  | Il1rl1     | interleukin 1 receptor-like 1 [MGI:98427]                    |
| 85 | 176,485,807,999,696  | Ups        | 0.003010  | Il21       | interleukin 21 [MGI:1890474]                                 |
| 86 | 230,066,482,602,652  | Ups        | 7.27E+02  | Il31ra     | interleukin 31 receptor A [MGI:2180511]                      |
| 87 | 130,453,096,106,341  | Ups        | 1.15E+03  | Il36g      | interleukin 36G [MGI:2449929]                                |
| 88 | -20,476,862,561,024  | Down       | 0.000175  | Il36rn     | interleukin 36 receptor antagonist [MGI:1859325]             |
| 89 | 130,036,094,444,114  | Ups        | 5.13E+04  | Il7        | interleukin 7 [MGI:96561]                                    |
| 90 | -111,699,687,487,171 | Down       | 1.86E+07  | Il9r       | interleukin 9 receptor [MGI:96564]                           |
| 91 | 140,084,799,393,161  | Ups        | 0.000230  | Inhba      | inhibin beta-A [MGI:96570]                                   |
| 92 | -21,723,990,655,809  | Down       | 7.06E+07  | Isg15      | ISG15 ubiquitin-like modifier [MGI:1855694]                  |
| 93 | 10,985,340,770,796   | Ups        | 7.35E+05  | Itgal      | integrin alpha L [MGI:96606]                                 |
| 94 | 170,268,517,632,289  | Ups        | 0.000198  | Itk        | IL2 inducible T cell kinase [MGI:96621]                      |
| 95 | 125,459,074,052,249  | Ups        | 0.002506  | Lbp        | lipopolysaccharide binding protein [MGI:1098776]             |
| 96 | 190,531,892,507,083  | Ups        | 9.49E-01  | Lepr       | leptin receptor [MGI:104993]                                 |
| 97 | 195,606,823,170,368  | Ups        | 6.82E+09  | Mcpt8      | mast cell protease 8 [MGI:1261780]                           |
| 98 | 318,990,894,151,124  | Ups        | 0.000936  | Mef2b      | myocyte enhancer factor 2B [MGI:104526]                      |

| No  | log2FoldChange       | Regulation | pvalue    | GeneSymbol    | Description                                                                                        |
|-----|----------------------|------------|-----------|---------------|----------------------------------------------------------------------------------------------------|
| 99  | -244,778,480,201,225 | Down       | 3.49E+04  | Mylk3         | myosin light chain kinase 3 [MGI:2443063]                                                          |
| 100 | 206,307,427,830,722  | Ups        | 6.11E+08  | Nr4a1         | nuclear receptor subfamily 4%2C group A%2C member 1 [MGI:1352454]                                  |
| 101 | 140,807,587,691,228  | Ups        | 0.000233  | Nrg4          | neuregulin 4 [MGI:1933833]                                                                         |
| 102 | -123,404,089,932,791 | Down       | 5.24E+06  | Oas3          | 2'-5' oligoadenylate synthetase 3 [MGI:2180850]                                                    |
| 103 | 117,445,939,106,954  | Ups        | 6.14E+09  | Pik3r5        | phosphoinositide-3-kinase regulatory subunit 5 [MGI:2443588]                                       |
| 104 | -133,287,965,835,189 | Down       | 5.07E+06  | Plk1          | polo like kinase 1 [MGI:97621]                                                                     |
| 105 | -104,251,762,395,897 | Down       | 0.001579  | Plk4          | polo like kinase 4 [MGI:101783]                                                                    |
| 106 | -140,973,404,555,974 | Down       | 6.19E+03  | Ppp2r5b       | protein phosphatase 2%2C regulatory subunit B%2C beta [MGI:2388480]                                |
| 107 | -119,274,080,025,242 | Down       | 8.67E+08  | Pttg1         | pituitary tumor-transforming gene 1 [MGI:1353578]                                                  |
| 108 | -127,930,415,599,265 | Down       | 6.07E+02  | Rb1           | RB transcriptional corepressor 1 [MGI:97874]                                                       |
| 109 | -147,966,832,814,432 | Down       | 1.05E+03  | Slc7a5        | solute carrier family 7 (cationic amino acid transporter%2C y+ system)%2C member 5 [MGI:1298205]   |
| 110 | -17,729,189,061,948  | Down       | 4.89E-01  | Steap3        | STEAP family member 3 [MGI:1915678]                                                                |
| 111 | -100,576,004,285,979 | Down       | 9.21E+05  | Stradb        | STE20-related kinase adaptor beta [MGI:2144047]                                                    |
| 112 | -569,990,542,082,376 | Down       | 2.18E+09  | Tac2          | tachykinin 2 [MGI:98476]                                                                           |
| 113 | -256,054,212,040,914 | Down       | 4.10E-24  | Tfrc          | transferrin receptor [MGI:98822]                                                                   |
| 114 | 127,345,586,880,791  | Ups        | 0.016243  | Tgif2-ps2     | TGFB-induced factor homeobox 2%2C pseudogene 2 [MGI:3805950]                                       |
| 115 | -110,926,096,539,279 | Down       | 0.02328   | Tlr5          | toll-like receptor 5 [MGI:1858171]                                                                 |
| 116 | 177,345,566,054,297  | Ups        | 1.32E-06  | TnfA          | tumor necrosis factor alpha [MGI:104798]                                                           |
| 117 | -12,835,308,350,574  | Down       | 1.30E+08  | Tnfrsf14      | tumor necrosis factor receptor superfamily%2C member 14 (herpesvirus entry mediator) [MGI:2675303] |
| 118 | -12,835,308,350,574  | Down       | 7.10E+09  | Tnfrsf14      | tumor necrosis factor receptor superfamily%2C member 14 (herpesvirus entry mediator) [MGI:2675303] |
| 119 | 111,907,388,148,338  | Ups        | 2.09E+05  | Tnfrsf19      | tumor necrosis factor receptor superfamily%2C member 19 [MGI:1352474]                              |
| 120 | 138,654,913,882,774  | Ups        | 9.37E+02  | Tnfrsf26      | tumor necrosis factor receptor superfamily%2C member 26 [MGI:2651928]                              |
| 121 | 126,360,264,547,992  | Ups        | 0.002553  | Tnfrsf4       | tumor necrosis factor receptor superfamily%2C member 4 [MGI:104512]                                |
| 122 | 140,756,226,052,026  | Ups        | 0.0083200 | Tnfrsf8       | tumor necrosis factor receptor superfamily%2C member 8 [MGI:99908]                                 |
| 123 | 201,992,426,611,829  | Ups        | 1.83E-01  | Tnfrsf9       | tumor necrosis factor receptor superfamily%2C member 9 [MGI:1101059]                               |
| 124 | -124,549,286,001,411 | Down       | 3.37E+04  | Tnfsf11       | tumor necrosis factor (ligand) superfamily%2C member 11 [MGI:1100089]                              |
| 125 | -112,781,139,803,128 | Down       | 0.000382  | Tnfsf4        | tumor necrosis factor (ligand) superfamily%2C member 4 [MGI:104511]                                |
| 126 | 167,968,548,512,929  | Ups        | 1.48E+02  | Tnfsf9        | tumor necrosis factor (ligand) superfamily%2C member 9 [MGI:1101058]                               |
| 127 | -111,930,677,425,682 | Down       | 1.03E+04  | Tubb4b        | tubulin%2C beta 4B class IVB [MGI:1915472]                                                         |
| 128 | -434,243,342,271,257 | Down       | 3.56E+03  | -             | novel transcript                                                                                   |
| 129 | -273,889,109,176,667 | Down       | 0.000376  | -             | novel transcript%2C sense intronic to KO:Slc15a2and Slc15a2                                        |
| 130 | -104,048,628,563,434 | Down       | 0.00049   | -             | -                                                                                                  |
| 131 | -341,077,137,026,181 | Down       | 0.00049   | -             | novel transcript%2C antisense to KO:Ttll12and Ttll12                                               |
| 132 | -351,528,111,201,895 | Down       | 0.001086  | -             | novel transcript%2C antisense to KO:Pabpc4and Pabpc4                                               |
| 133 | -411,236,887,617,685 | Down       | 0.001548  | -             | novel transcript%2C antisense to Gabbr2                                                            |
| 134 | 179,100,280,513,905  | Ups        | 0.002734  | -             | novel transcript%2C antisense to Gnat1                                                             |
| 135 | -137,309,207,578,791 | Down       | 1.43E+04  | 1700037H04Rik | RIKEN cDNA 1700037H04 gene [MGI:1914576]                                                           |
| 136 | -555,429,592,465,739 | Down       | 1.15E-02  | 5430401H09Rik | RIKEN cDNA 5430401H09 gene [MGI:1918646]                                                           |
| 137 | -639,179,289,803,535 | Down       | 4.50E+07  | 6030468B19Rik | RIKEN cDNA 6030468B19 gene [MGI:1924977]                                                           |
| 138 | -454,409,961,145,704 | Down       | 0.0001321 | A730036I17Rik | RIKEN cDNA A730036I17 gene [MGI:3041182]                                                           |

| No  | log2FoldChange       | Regulation | pvalue    | GeneSymbol    | Description                                                                                                            |
|-----|----------------------|------------|-----------|---------------|------------------------------------------------------------------------------------------------------------------------|
| 139 | -342,837,596,295,548 | Down       | 8.57E+08  | A930006K02Rik | RIKEN cDNA A930006K02 gene [MGI:1925683]                                                                               |
| 140 | -259,310,233,630,567 | Down       | 7.90E-31  | Abcb10        | ATP-binding cassette%2C sub-family B (MDR/TAP)%2C member 10 [MGI:1860508]                                              |
| 141 | -336,704,415,070,037 | Down       | 0.0002556 | Abcg4         | ATP binding cassette subfamily G member 4 [MGI:1890594]                                                                |
| 142 | 108,963,495,754,287  | Ups        | 7.61E+04  | Acaca         | acetyl-Coenzyme A carboxylase alpha [MGI:108451]                                                                       |
| 143 | -149,004,845,468,933 | Down       | 1.20E+09  | Ache          | acetylcholinesterase [MGI:87876]                                                                                       |
| 144 | -314,251,066,600,075 | Down       | 3.38E+02  | Ackr1         | atypical chemokine receptor 1 (Duffy blood group) [MGI:1097689]                                                        |
| 145 | -391,252,668,822,265 | Down       | 2.04E+07  | Add2          | adducin 2 (beta) [MGI:87919]                                                                                           |
| 146 | -101,310,507,924,452 | Down       | 0.000292  | Adh4          | alcohol dehydrogenase 4 (class II)%2C pi polypeptide [MGI:1349472]                                                     |
| 147 | -163,885,346,479,355 | Down       | 5.59E+07  | Agpat4        | 1-acylglycerol-3-phosphate O-acyltransferase 4 (lysophosphatidic acid acyltransferase%2C delta) [MGI:1915512]          |
| 148 | -116,806,433,593,855 | Down       | 3.57E+04  | Alad          | aminolevulinate%2C delta-%2C dehydratase [MGI:96853]                                                                   |
| 149 | -346,721,610,051,237 | Down       | 5.85E-62  | Alas2         | aminolevulinic acid synthase 2%2C erythroid [MGI:87990]                                                                |
| 150 | 112,608,712,687,158  | Ups        | 1.12E+08  | Alox5ap       | arachidonate 5-lipoxygenase activating protein [MGI:107505]                                                            |
| 151 | -128,558,398,542,388 | Down       | 2.72E+05  | Ammecr1       | Alport syndrome%2C mental retardation%2C midface hypoplasia and elliptocytosis chromosomal region gene 1 [MGI:1860206] |
| 152 | -155,611,997,421,526 | Down       | 0.001416  | Angptl7       | angiopoietin-like 7 [MGI:3605801]                                                                                      |
| 153 | 136,624,408,062,102  | Ups        | 0.0020184 | Angptl8       | angiopoietin-like 8 [MGI:3643534]                                                                                      |
| 154 | -251,522,226,119,751 | Down       | 4.72E+08  | Ankle1        | ankyrin repeat and LEM domain containing 1 [MGI:1918775]                                                               |
| 155 | -171,060,770,691,226 | Down       | 1.75E+08  | Ankrd9        | ankyrin repeat domain 9 [MGI:1921501]                                                                                  |
| 156 | -20,226,253,258,078  | Down       | 4.83E-02  | Anln          | anillin%2C actin binding protein [MGI:1920174]                                                                         |
| 157 | -126,638,298,373,307 | Down       | 0.0017058 | Aplf          | aprataxin and PNKP like factor [MGI:1919353]                                                                           |
| 158 | -400,360,210,191,041 | Down       | 1.43E+08  | Apol11a       | apolipoprotein L 11a [MGI:3649094]                                                                                     |
| 159 | -407,742,055,531,814 | Down       | 5.38E-42  | Apol11b       | apolipoprotein L 11b [MGI:3036248]                                                                                     |
| 160 | -562,325,824,226,481 | Down       | 1.30E+00  | Apol8         | apolipoprotein L 8 [MGI:2444921]                                                                                       |
| 161 | -109,944,638,489,442 | Down       | 2.31E+03  | Arf5          | ADP-ribosylation factor 5 [MGI:99434]                                                                                  |
| 162 | -128,580,297,579,723 | Down       | 1.49E+09  | Arhgap11a     | Rho GTPase activating protein 11A [MGI:2444300]                                                                        |
| 163 | -116,273,341,131,115 | Down       | 1.30E+09  | Arhgap19      | Rho GTPase activating protein 19 [MGI:1918335]                                                                         |
| 164 | -104,754,486,648,274 | Down       | 2.95E+09  | Arhgap23      | Rho GTPase activating protein 23 [MGI:3697726]                                                                         |
| 165 | 109,967,844,944,274  | Ups        | 0.000413  | Arl4c         | ADP-ribosylation factor-like 4C [MGI:2445172]                                                                          |
| 166 | -158,603,418,042,842 | Down       | 2.42E+08  | Art4          | ADP-ribosyltransferase 4 [MGI:1202710]                                                                                 |
| 167 | -196,035,683,796,039 | Down       | 6.54E-03  | Asb1          | ankyrin repeat and SOCS box-containing 1 [MGI:1929735]                                                                 |
| 168 | -359,607,725,001,683 | Down       | 0.0008560 | Asb17os       | ankyrin repeat and SOCS box-containing 17%2C opposite strand [MGI:1919567]                                             |
| 169 | -156,219,954,642,057 | Down       | 1.81E+06  | Asf1b         | anti-silencing function 1B histone chaperone [MGI:1914179]                                                             |
| 170 | -174,805,716,150,263 | Down       | 4.00E+03  | Aspm          | abnormal spindle microtubule assembly [MGI:1334448]                                                                    |
| 171 | -102,599,676,294,887 | Down       | 6.46E+05  | Atad2         | ATPase family%2C AAA domain containing 2 [MGI:1917722]                                                                 |
| 172 | -154,722,729,959,519 | Down       | 1.22E+05  | Atad5         | ATPase family%2C AAA domain containing 5 [MGI:2442925]                                                                 |
| 173 | -106,736,588,879,489 | Down       | 7.65E+07  | Atg4a         | autophagy related 4A%2C cysteine peptidase [MGI:2147903]                                                               |
| 174 | 124,691,900,817,654  | Ups        | 0.002131  | Atp8b4        | ATPase%2C class I%2C type 8B%2C member 4 [MGI:1859664]                                                                 |
| 175 | -10,583,338,222,126  | Down       | 1.29E+06  | Atpif1        | ATPase inhibitory factor 1 [MGI:1196457]                                                                               |
| 176 | -197,574,654,436,853 | Down       | 2.87E+02  | Aurka         | aurora kinase A [MGI:894678]                                                                                           |
| 177 | -132,922,019,102,689 | Down       | 2.65E+08  | Aurkb         | aurora kinase B [MGI:107168]                                                                                           |
| 178 | -136,740,881,832,979 | Down       | 9.57E+09  | AW011738      | expressed sequence AW011738 [MGI:2140540]                                                                              |



| No  | log2FoldChange       | Regulation | pvalue     | GeneSymbol | Description                                                                        |
|-----|----------------------|------------|------------|------------|------------------------------------------------------------------------------------|
| 179 | -123,097,770,522,251 | Down       | 4.39E+06   | B4galt5    | UDP-Gal:betaGlcNAc beta 1%2C4-galactosyltransferase%2C polypeptide 5 [MGI:1927169] |
| 180 | -118,365,467,230,862 | Down       | 0.0008948  | Bard1      | BRCA1 associated RING domain 1 [MGI:1328361]                                       |
| 181 | -252,019,070,948,169 | Down       | 3.74E-09   | Birc5      | baculoviral IAP repeat-containing 5 [MGI:1203517]                                  |
| 182 | -208,518,187,462,503 | Down       | 5.29E+02   | Blm        | Bloom syndrome%2C RecQ like helicase [MGI:1328362]                                 |
| 183 | -153,117,045,434,278 | Down       | 9.99E+00   | Blvrb      | biliverdin reductase B (flavin reductase (NADPH)) [MGI:2385271]                    |
| 184 | -120,953,009,417,023 | Down       | 7.13E+01   | Bnip3l     | BCL2/adenovirus E1B interacting protein 3-like [MGI:1332659]                       |
| 185 | -201,512,150,742,514 | Down       | 5.05E-11   | Bpgm       | 2%2C3-bisphosphoglycerate mutase [MGI:1098242]                                     |
| 186 | -201,061,613,713,235 | Down       | 3.83E+04   | Brcal      | breast cancer 1%2C early onset [MGI:104537]                                        |
| 187 | -123,646,839,990,213 | Down       | 6.63E+08   | Brcal      | breast cancer 2%2C early onset [MGI:109337]                                        |
| 188 | -150,363,451,755,707 | Down       | 7.97E+00   | Brpf3      | bromodomain and PHD finger containing%2C 3 [MGI:2146836]                           |
| 189 | -221,046,151,407,855 | Down       | 0.000387   | Bsn        | bassoon [MGI:1277955]                                                              |
| 190 | -100,040,956,627,082 | Down       | 1.28E+08   | Btg2       | BTG anti-proliferation factor 2 [MGI:108384]                                       |
| 191 | -540,879,121,867,602 | Down       | 3.00E+05   | Btnl10     | butyrophilin-like 10 [MGI:2182073]                                                 |
| 192 | -109,544,249,552,137 | Down       | 2.83E+07   | Btrc       | beta-transducin repeat containing protein [MGI:1338871]                            |
| 193 | -115,834,779,968,322 | Down       | 0.0011034  | Bub1       | BUB1%2C mitotic checkpoint serine/threonine kinase [MGI:1100510]                   |
| 194 | 106,998,070,068,558  | Ups        | 7.40E+09   | Capg       | capping protein (actin filament)%2C gelsolin-like [MGI:1098259]                    |
| 195 | -238,775,223,846,982 | Down       | 1.75E-18   | Car2       | carbonic anhydrase 2 [MGI:88269]                                                   |
| 196 | -124,595,515,673,024 | Down       | 1.17E+00   | Carhsp1    | calcium regulated heat stable protein 1 [MGI:1196368]                              |
| 197 | -169,606,525,993,443 | Down       | 0.0001588  | Ccdc18     | coiled-coil domain containing 18 [MGI:1922974]                                     |
| 198 | -104,168,225,090,023 | Down       | 0.0009183  | Ccdc34     | coiled-coil domain containing 34 [MGI:1915451]                                     |
| 199 | -695,172,851,874,073 | Down       | 4.39E+05   | Ccdc92b    | coiled-coil domain containing 92B [MGI:3588240]                                    |
| 200 | -206,386,149,595,676 | Down       | 4.93E-09   | Ccna2      | cyclin A2 [MGI:108069]                                                             |
| 201 | -211,696,707,923,297 | Down       | 2.68E-07   | Ccnf       | cyclin F [MGI:102551]                                                              |
| 202 | -263,796,676,794,267 | Down       | 7.28E+07   | Cd163      | CD163 antigen [MGI:2135946]                                                        |
| 203 | -263,796,676,794,267 | Down       | 2.10E+09   | Cd163      | CD163 antigen [MGI:2135946]                                                        |
| 204 | 113,999,749,539,974  | Ups        | 0.0087468  | Cd177      | CD177 antigen [MGI:1916141]                                                        |
| 205 | 134,757,345,757,161  | Ups        | 0.0002374  | Cd200r3    | CD200 receptor 3 [MGI:1921853]                                                     |
| 206 | -112,781,139,803,128 | Down       | 0.0066052  | Cd200r4    | CD200 receptor 4 [MGI:3036289]                                                     |
| 207 | 188,047,703,676,007  | Ups        | 8.08E+05   | Cd207      | CD207 antigen [MGI:2180021]                                                        |
| 208 | -287,549,502,780,372 | Down       | 9.68E-35   | Cd24a      | CD24a antigen [MGI:88323]                                                          |
| 209 | -287,549,502,780,372 | Down       | 1.85E+00   | Cd24a      | CD24a antigen [MGI:88323]                                                          |
| 210 | 303,442,553,022,332  | Ups        | 0.0001933  | Cd300c     | CD300C molecule [MGI:3032626]                                                      |
| 211 | -112,781,139,803,128 | Down       | 2.56E+09   | Cd300ld5   | CD300 molecule like family member D5 [MGI:3702661]                                 |
| 212 | 128,952,839,438,254  | Ups        | 1.04E-06   | Cd300lf    | CD300 molecule like family member F [MGI:2442359]                                  |
| 213 | -177,786,408,180,693 | Down       | 0.00040531 | Cd59b      | CD59b antigen [MGI:1888996]                                                        |
| 214 | 121,317,090,676,902  | Ups        | 2.95E+08   | Cd69       | CD69 antigen [MGI:88343]                                                           |
| 215 | -169,903,082,404,793 | Down       | 0.00290506 | Cdc25c     | cell division cycle 25C [MGI:88350]                                                |
| 216 | -109,473,850,812,251 | Down       | 0.00070248 | Cdc45      | cell division cycle 45 [MGI:1338073]                                               |
| 217 | -230,615,463,403,614 | Down       | 0.00026246 | Cdc6       | cell division cycle 6 [MGI:1345150]                                                |
| 218 | -2,056,870,095,251   | Down       | 9.43E-03   | Cdca3      | cell division cycle associated 3 [MGI:1315198]                                     |

| No  | log2FoldChange       | Regulation | pvalue    | GeneSymbol | Description                                                                                         |
|-----|----------------------|------------|-----------|------------|-----------------------------------------------------------------------------------------------------|
| 219 | -152,222,094,309,374 | Down       | 3.25E+09  | Cdca5      | cell division cycle associated 5 [MGI:1915099]                                                      |
| 220 | -16,446,860,727,343  | Down       | 3.65E+03  | Cdca8      | cell division cycle associated 8 [MGI:1196274]                                                      |
| 221 | -181,246,532,634,319 | Down       | 9.53E+09  | Cdkn3      | cyclin-dependent kinase inhibitor 3 [MGI:1919641]                                                   |
| 222 | -195,547,131,319,862 | Down       | 5.62E-11  | Cdr2       | cerebellar degeneration-related 2 [MGI:1100885]                                                     |
| 223 | -139,524,880,374,581 | Down       | 5.92E+05  | Cdt1       | chromatin licensing and DNA replication factor 1 [MGI:1914427]                                      |
| 224 | -159,729,548,860,146 | Down       | 3.14E+03  | Cenpa      | centromere protein A [MGI:88375]                                                                    |
| 225 | -173,080,353,861,835 | Down       | 4.80E+01  | Cenpe      | centromere protein E [MGI:1098230]                                                                  |
| 226 | -231,855,305,506,242 | Down       | 7.28E-22  | Cenpf      | centromere protein F [MGI:1313302]                                                                  |
| 227 | -191,510,934,479,184 | Down       | 4.00E+09  | Cenph      | centromere protein H [MGI:1349448]                                                                  |
| 228 | -163,209,918,128,691 | Down       | 0.000168  | Cenpk      | centromere protein K [MGI:1926210]                                                                  |
| 229 | -171,740,798,257,934 | Down       | 4.08E+09  | Cenpm      | centromere protein M [MGI:1913820]                                                                  |
| 230 | -118,501,185,400,556 | Down       | 0.0021422 | Cenpn      | centromere protein N [MGI:1919405]                                                                  |
| 231 | -159,289,415,307,847 | Down       | 0.0004609 | Cenpp      | centromere protein P [MGI:1913586]                                                                  |
| 232 | -1,041,621,295,179   | Down       | 0.0013864 | Cep128     | centrosomal protein 128 [MGI:1922466]                                                               |
| 233 | -177,029,888,394,609 | Down       | 4.51E+01  | Cep76      | centrosomal protein 76 [MGI:1923401]                                                                |
| 234 | -189,926,834,540,841 | Down       | 3.67E+06  | Cercam     | cerebral endothelial cell adhesion molecule [MGI:2139134]                                           |
| 235 | 151,246,114,179,633  | Ups        | 6.48E+02  | Cfh        | complement component factor h [MGI:88385]                                                           |
| 236 | -10,873,272,653,572  | Down       | 5.45E+04  | Chac2      | ChaC%2C cation transport regulator 2 [MGI:1915294]                                                  |
| 237 | -113,097,149,851,405 | Down       | 0.0002031 | Chaf1a     | chromatin assembly factor 1%2C subunit A (p150) [MGI:1351331]                                       |
| 238 | -102,688,383,695,243 | Down       | 0.002391  | Chaf1b     | chromatin assembly factor 1%2C subunit B (p60) [MGI:1314881]                                        |
| 239 | 118,299,954,404,024  | Ups        | 2.22E+08  | Ciita      | class II transactivator [MGI:108445]                                                                |
| 240 | -202,506,372,782,241 | Down       | 4.14E-02  | Cit        | citron [MGI:105313]                                                                                 |
| 241 | -14,782,151,326,746  | Down       | 0.0003016 | Cited4     | Cbp/p300-interacting transactivator%2C with Glu/Asp-rich carboxy-terminal domain%2C 4 [MGI:1861694] |
| 242 | -142,117,373,904,675 | Down       | 5.71E+09  | Ckap2      | cytoskeleton associated protein 2 [MGI:1931797]                                                     |
| 243 | -143,945,398,707,593 | Down       | 1.38E+05  | Ckap2l     | cytoskeleton associated protein 2-like [MGI:1917716]                                                |
| 244 | -118,900,012,978,472 | Down       | 1.70E+06  | Cks2       | CDC28 protein kinase regulatory subunit 2 [MGI:1913447]                                             |
| 245 | -154,556,674,348,507 | Down       | 9.72E+07  | Clspn      | claspin [MGI:2445153]                                                                               |
| 246 | -117,331,596,038,157 | Down       | 5.35E+03  | Cmas       | cytidine monophospho-N-acetylneuraminic acid synthetase [MGI:1337124]                               |
| 247 | -101,239,782,249,831 | Down       | 1.27E+07  | Col3a1     | collagen%2C type III%2C alpha 1 [MGI:88453]                                                         |
| 248 | -129,111,128,188,097 | Down       | 0.003375  | Cox6b2     | cytochrome c oxidase subunit 6B2 [MGI:3044182]                                                      |
| 249 | -139,822,465,692,489 | Down       | 9.41E+00  | Cpox       | coproporphyrinogen oxidase [MGI:104841]                                                             |
| 250 | -217,279,442,941,864 | Down       | 3.00E+07  | Cracd      | capping protein inhibiting regulator of actin [MGI:2444817]                                         |
| 251 | 183,376,987,255,782  | Ups        | 0.0035880 | Crybb3     | crystallin%2C beta B3 [MGI:102717]                                                                  |
| 252 | -173,018,819,121,458 | Down       | 0.0007940 | Csrp3      | cysteine and glycine-rich protein 3 [MGI:1330824]                                                   |
| 253 | -249,341,158,048,745 | Down       | 9.86E-29  | Ctse       | cathepsin E [MGI:107361]                                                                            |
| 254 | 204,876,953,848,562  | Ups        | 2.06E+08  | Cyp27b1    | cytochrome P450%2C family 27%2C subfamily b%2C polypeptide 1 [MGI:1098274]                          |
| 255 | 140,853,929,403,578  | Ups        | 7.37E+04  | Cyp2c70    | cytochrome P450%2C family 2%2C subfamily c%2C polypeptide 70 [MGI:2385878]                          |
| 256 | 226,825,396,638,894  | Ups        | 0.0004966 | Cyp2d12    | cytochrome P450%2C family 2%2C subfamily d%2C polypeptide 12 [MGI:88604]                            |
| 257 | -143,555,680,037,344 | Down       | 0.0028141 | Cyp2f2     | cytochrome P450%2C family 2%2C subfamily f%2C polypeptide 2 [MGI:88608]                             |
| 258 | 107,839,997,157,827  | Ups        | 6.77E+07  | Cyp3a13    | cytochrome P450%2C family 3%2C subfamily a%2C polypeptide 13 [MGI:88610]                            |

| No  | log2FoldChange       | Regulation | pvalue     | GeneSymbol    | Description                                                                                             |
|-----|----------------------|------------|------------|---------------|---------------------------------------------------------------------------------------------------------|
| 259 | -17,405,040,784,291  | Down       | 0.00029606 | Cyp3a41b      | cytochrome P450%2C family 3%2C subfamily a%2C polypeptide 41B [MGI:3714859]                             |
| 260 | -467,440,737,208,487 | Down       | 0.0018468  | Cyp4a12b      | cytochrome P450%2C family 4%2C subfamily a%2C polypeptide 12B [MGI:3611747]                             |
| 261 | -429,483,228,403,398 | Down       | 0.0006834  | Cyp4b1-ps2    | cytochrome P450%2C family 4%2C subfamily b%2C polypeptide 1%2C pseudogene 2 [MGI:3649236]               |
| 262 | -147,365,233,981,481 | Down       | 7.88E+07   | D630023F18Rik | RIKEN cDNA D630023F18 gene [MGI:2138198]                                                                |
| 263 | -122,703,107,488,638 | Down       | 1.34E+09   | Dbf4          | DBF4 zinc finger [MGI:1351328]                                                                          |
| 264 | -150,721,170,482,911 | Down       | 5.34E+04   | Dck           | deoxycytidine kinase [MGI:102726]                                                                       |
| 265 | -282,776,342,744,556 | Down       | 2.40E+07   | Dclk2         | doublecortin-like kinase 2 [MGI:1918012]                                                                |
| 266 | -120,739,652,676,595 | Down       | 1.31E+03   | Dek           | DEK proto-oncogene (DNA binding) [MGI:1926209]                                                          |
| 267 | -108,858,128,209,542 | Down       | 9.13E+06   | Dennd4a       | DENN/MADD domain containing 4A [MGI:2142979]                                                            |
| 268 | -246,461,177,643,243 | Down       | 3.48E+05   | Depdc1a       | DEP domain containing 1a [MGI:1923381]                                                                  |
| 269 | -151,906,460,490,213 | Down       | 2.37E+07   | Depdc1b       | DEP domain containing 1B [MGI:2145425]                                                                  |
| 270 | -200,213,713,164,137 | Down       | 2.17E-01   | Depp1         | DEPPI autophagy regulator [MGI:1918730]                                                                 |
| 271 | -244,238,722,089,009 | Down       | 7.59E-24   | Dhrs11        | dehydrogenase/reductase (SDR family) member 11 [MGI:2652816]                                            |
| 272 | -205,584,341,779,647 | Down       | 7.27E+01   | Diaph3        | diaphanous related formin 3 [MGI:1927222]                                                               |
| 273 | -120,802,227,801,871 | Down       | 1.84E+07   | Dleu2         | deleted in lymphocytic leukemia%2C 2 [MGI:1934030]                                                      |
| 274 | -200,349,026,353,839 | Down       | 3.75E-01   | Dlgap5        | DLG associated protein 5 [MGI:2183453]                                                                  |
| 275 | -155,769,270,092,496 | Down       | 1.12E-07   | Dmtn          | dematin actin binding protein [MGI:99670]                                                               |
| 276 | -191,935,638,897,566 | Down       | 2.05E+08   | Dnaja4        | DnaJ heat shock protein family (Hsp40) member A4 [MGI:1927638]                                          |
| 277 | -237,971,340,363,704 | Down       | 9.04E+07   | Dnajb13       | DnaJ heat shock protein family (Hsp40) member B13 [MGI:1916637]                                         |
| 278 | -103,104,117,259,883 | Down       | 0.000953   | Donson        | downstream neighbor of SON [MGI:1890621]                                                                |
| 279 | 195,855,630,079,441  | Ups        | 6.06E+09   | Dsg1c         | desmoglein 1 gamma [MGI:2664358]                                                                        |
| 280 | -162,336,210,663,483 | Down       | 3.84E+08   | Dtl           | denticleless E3 ubiquitin protein ligase [MGI:1924093]                                                  |
| 281 | -226,807,455,453,516 | Down       | 5.66E+05   | Dyrk3         | dual-specificity tyrosine-(Y)-phosphorylation regulated kinase 3 [MGI:1330300]                          |
| 282 | -108,390,365,303,045 | Down       | 3.75E+07   | E2f4          | E2F transcription factor 4 [MGI:103012]                                                                 |
| 283 | -133,000,415,383,189 | Down       | 0.0017345  | E2f7          | E2F transcription factor 7 [MGI:1289147]                                                                |
| 284 | -199,730,108,621,999 | Down       | 7.69E-01   | E2f8          | E2F transcription factor 8 [MGI:1922038]                                                                |
| 285 | -100,402,632,678,239 | Down       | 2.99E+05   | Eci3          | enoyl-Coenzyme A delta isomerase 3 [MGI:1916373]                                                        |
| 286 | -134,616,256,289,274 | Down       | 2.52E+05   | Ect2          | ect2 oncogene [MGI:95281]                                                                               |
| 287 | -138,418,545,723,529 | Down       | 4.34E+03   | Ehbp111       | EH domain binding protein 1-like 1 [MGI:3612340]                                                        |
| 288 | -117,315,984,231,176 | Down       | 8.17E-02   | Eif2ak1       | eukaryotic translation initiation factor 2 alpha kinase 1 [MGI:1353448]                                 |
| 289 | -116,932,079,570,013 | Down       | 0.000175   | Eln           | elastin [MGI:95317]                                                                                     |
| 290 | -130,524,450,211,244 | Down       | 2.14E+07   | Emilin2       | elastin microfibril interfacier 2 [MGI:2389136]                                                         |
| 291 | -171,387,492,163,693 | Down       | 3.58E-02   | Endod1        | endonuclease domain containing 1 [MGI:1919196]                                                          |
| 292 | -515,157,579,240,407 | Down       | 1.41E-03   | Epb42         | erythrocyte membrane protein band 4.2 [MGI:95402]                                                       |
| 293 | 100,115,631,015,582  | Ups        | 5.77E+09   | Epsti1        | epithelial stromal interaction 1 (breast) [MGI:1915168]                                                 |
| 294 | 183,377,634,828,116  | Ups        | 0.0009091  | Epx           | eosinophil peroxidase [MGI:107569]                                                                      |
| 295 | -113,428,205,155,491 | Down       | 0.000761   | Ercc6l        | excision repair cross-complementing rodent repair deficiency complementation group 6 like [MGI:2654144] |
| 296 | -119,857,578,956,375 | Down       | 1.51E+09   | Erich4        | glutamate rich 4 [MGI:3646269]                                                                          |
| 297 | -393,386,943,537,366 | Down       | 4.90E+05   | Ermap         | erythroblast membrane-associated protein [MGI:1349816]                                                  |
| 298 | -235,273,893,398,821 | Down       | 7.97E+02   | Esco2         | establishment of sister chromatid cohesion N-acetyltransferase 2 [MGI:1919238]                          |



| No  | log2FoldChange       | Regulation | pvalue    | GeneSymbol    | Description                                                                                                |
|-----|----------------------|------------|-----------|---------------|------------------------------------------------------------------------------------------------------------|
| 299 | -152,600,993,326,165 | Down       | 1.38E+08  | Espl1         | extra spindle pole bodies 1%2C separase [MGI:2146156]                                                      |
| 300 | 10,821,109,620,107   | Ups        | 0.002960  | Extl1         | exostosin-like glycosyltransferase 1 [MGI:1888742]                                                         |
| 301 | -422,996,145,149,788 | Down       | 2.98E-10  | F930017D23Rik | RIKEN cDNA F930017D23 gene [MGI:3822538]                                                                   |
| 302 | -271,855,003,716,013 | Down       | 6.27E-25  | Fam117a       | family with sequence similarity 117%2C member A [MGI:2144564]                                              |
| 303 | -115,675,973,265,641 | Down       | 4.53E+03  | Fam126a       | family with sequence similarity 126%2C member A [MGI:2149839]                                              |
| 304 | -15,082,068,710,577  | Down       | 5.82E+03  | Fam214b       | family with sequence similarity 214%2C member B [MGI:2441854]                                              |
| 305 | -137,895,777,203,314 | Down       | 4.48E+08  | Fam241a       | family with sequence similarity 241%2C member A [MGI:1917867]                                              |
| 306 | -160,848,863,059,924 | Down       | 5.11E-04  | Fam53b        | family with sequence similarity 53%2C member B [MGI:1925188]                                               |
| 307 | -144,981,871,493,755 | Down       | 0.0006788 | Fancd2        | Fanconi anemia%2C complementation group D2 [MGI:2448480]                                                   |
| 308 | -102,854,160,818,016 | Down       | 1.50E+07  | Fbxo30        | F-box protein 30 [MGI:1919115]                                                                             |
| 309 | -112,890,995,561,633 | Down       | 3.87E+08  | Fbxo34        | F-box protein 34 [MGI:1926188]                                                                             |
| 310 | -227,981,692,886,032 | Down       | 7.40E-07  | Fbxo5         | F-box protein 5 [MGI:1914391]                                                                              |
| 311 | -120,195,923,207,238 | Down       | 0.00012   | Fcho1         | FCH domain only 1 [MGI:1921265]                                                                            |
| 312 | -176,354,874,820,901 | Down       | 1.56E-03  | Fech          | ferrochelatase [MGI:95513]                                                                                 |
| 313 | -242,427,834,746,361 | Down       | 4.99E+09  | Fen1          | flap structure specific endonuclease 1 [MGI:102779]                                                        |
| 314 | 104,435,207,503,205  | Ups        | 0.00151   | Fes           | feline sarcoma oncogene [MGI:95514]                                                                        |
| 315 | 120,836,204,993,121  | Ups        | 5.13E+09  | Fga           | fibrinogen alpha chain [MGI:1316726]                                                                       |
| 316 | 113,128,588,800,842  | Ups        | 0.000111  | Fgb           | fibrinogen beta chain [MGI:99501]                                                                          |
| 317 | 125,376,899,774,325  | Ups        | 6.92E+06  | Fgl1          | fibrinogen-like protein 1 [MGI:102795]                                                                     |
| 318 | -444,855,038,445,132 | Down       | 7.07E-25  | Fhdc1         | FH2 domain containing 1 [MGI:2684972]                                                                      |
| 319 | -18,263,346,742,573  | Down       | 6.52E+06  | Figl1         | fidgetin-like 1 [MGI:1890648]                                                                              |
| 320 | 128,347,500,619,305  | Ups        | 9.70E+01  | Fmo5          | flavin containing monooxygenase 5 [MGI:1310004]                                                            |
| 321 | -164,913,200,171,024 | Down       | 7.11E+02  | Fn3k          | fructosamine 3 kinase [MGI:1926834]                                                                        |
| 322 | -132,361,390,961,698 | Down       | 0.0002300 | Fn3krp        | fructosamine 3 kinase related protein [MGI:2679256]                                                        |
| 323 | -172,640,964,041,203 | Down       | 7.62E-10  | Fzr1          | fizzy and cell division cycle 20 related 1 [MGI:1926790]                                                   |
| 324 | -264,054,375,581,517 | Down       | 4.68E+08  | Gata1         | GATA binding protein 1 [MGI:95661]                                                                         |
| 325 | 14,441,656,148,726   | Ups        | 5.75E+09  | Gbp5          | guanylate binding protein 5 [MGI:2429943]                                                                  |
| 326 | -169,615,207,974,893 | Down       | 6.18E-09  | Gch1          | GTP cyclohydrolase 1 [MGI:95675]                                                                           |
| 327 | 256,443,720,260,061  | Ups        | 0.0024946 | Gcnt4         | glucosaminyl (N-acetyl) transferase 4%2C core 2 (beta-1%2C6-N-acetylglucosaminyltransferase) [MGI:2684919] |
| 328 | -169,597,857,238,756 | Down       | 0.0008862 | Gdpd1         | glycerophosphodiester phosphodiesterase domain containing 1 [MGI:1913819]                                  |
| 329 | -150,687,423,347,316 | Down       | 0.0002028 | Gen1          | GEN1%2C Holliday junction 5' flap endonuclease [MGI:2443149]                                               |
| 330 | -238,342,196,884,754 | Down       | 5.56E+09  | Gfi1b         | growth factor independent 1B [MGI:1276578]                                                                 |
| 331 | -130,071,560,946,838 | Down       | 8.75E-04  | Glrx5         | glutaredoxin 5 [MGI:1920296]                                                                               |
| 332 | -218,970,425,899,037 | Down       | 0.0009246 | Gm10110       | predicted gene 10110 [MGI:3641718]                                                                         |
| 333 | 612,991,770,728,039  | Ups        | 1.76E+05  | Gm10320       | predicted pseudogene 10320 [MGI:3642323]                                                                   |
| 334 | -34,309,053,359,124  | Down       | 1.07E+07  | Gm10371       | predicted gene 10371 [MGI:3642716]                                                                         |
| 335 | -267,868,358,129,519 | Down       | 2.92E+08  | Gm10603       | predicted gene 10603 [MGI:3642592]                                                                         |
| 336 | -256,920,023,688,061 | Down       | 5.14E+05  | Gm11427       | predicted gene 11427 [MGI:3651774]                                                                         |
| 337 | -312,570,981,853,823 | Down       | 1.57E-15  | Gm12346       | predicted gene 12346 [MGI:3649810]                                                                         |
| 338 | -11,690,620,784,272  | Down       | 0.002523  | Gm12678       | predicted gene 12678 [MGI:3650923]                                                                         |

| No  | log2FoldChange       | Regulation | pvalue     | GeneSymbol | Description                                                                      |
|-----|----------------------|------------|------------|------------|----------------------------------------------------------------------------------|
| 339 | 186,698,049,374,709  | Ups        | 3.83E+08   | Gm12781    | predicted gene 12781 [MGI:3649569]                                               |
| 340 | -62,874,355,416,078  | Down       | 1.21E+08   | Gm14198    | predicted gene 14198 [MGI:3652051]                                               |
| 341 | -62,141,404,390,413  | Down       | 5.20E+08   | Gm15774    | predicted gene 15774 [MGI:3783215]                                               |
| 342 | -58,495,071,043,751  | Down       | 3.05E+09   | Gm15816    | predicted gene 15816 [MGI:3802114]                                               |
| 343 | -555,503,956,958,135 | Down       | 1.08E+08   | Gm16538    | predicted gene 16538 [MGI:4414958]                                               |
| 344 | -307,080,731,517,632 | Down       | 0.003779   | Gm19765    | predicted gene%2C 19765 [Source:NCBI gene (formerly Entrezgene)%3BAcc:102638993] |
| 345 | -501,551,769,012,372 | Down       | 1.49E+09   | Gm20161    | predicted gene%2C 20161 [MGI:5012346]                                            |
| 346 | -188,414,836,371,948 | Down       | 6.83E+08   | Gm2788     | predicted gene 2788 [MGI:3780956]                                                |
| 347 | -520,448,835,522,959 | Down       | 0.000114   | Gm31452    | predicted gene%2C 31452 [MGI:5590611]                                            |
| 348 | -486,009,884,707,315 | Down       | 0.00053    | Gm43413    | predicted gene 43413 [MGI:5663550]                                               |
| 349 | -185,486,997,193,523 | Down       | 0.00043    | Gm43611    | predicted gene 43611 [MGI:5663748]                                               |
| 350 | -516,208,149,173,838 | Down       | 0.000138   | Gm43864    | predicted gene%2C 43864 [MGI:5690256]                                            |
| 351 | -273,508,448,785,701 | Down       | 0.0006492  | Gm44005    | predicted gene%2C 44005 [MGI:5690397]                                            |
| 352 | -116,624,469,284,803 | Down       | 0.002815   | Gm4739     | predicted gene 4739 [MGI:3642984]                                                |
| 353 | -194,665,537,845,948 | Down       | 4.94E+09   | Gm4952     | predicted gene 4952 [MGI:3643569]                                                |
| 354 | 138,437,989,078,473  | Ups        | 0.00052    | Gm5182     | predicted gene 5182 [MGI:3649174]                                                |
| 355 | 15,285,914,442,045   | Ups        | 0.000239   | Gm5834     | predicted pseudogene 5834 [MGI:3643955]                                          |
| 356 | -246,880,296,377,377 | Down       | 0.002272   | Gm5844     | predicted gene 5844 [MGI:3645252]                                                |
| 357 | -168,378,461,678,673 | Down       | 7.13E+09   | Gm7993     | predicted gene 7993 [MGI:3647399]                                                |
| 358 | -428,458,389,435,289 | Down       | 1.07E-01   | Gm867      | predicted gene 867 [MGI:2685713]                                                 |
| 359 | -220,547,714,585,842 | Down       | 0.000324   | Gm9260     | predicted gene 9260 [MGI:3645725]                                                |
| 360 | -314,745,100,591,477 | Down       | 6.60E+08   | Gm9895     | predicted gene 9895 [MGI:3642802]                                                |
| 361 | -11,001,041,746,312  | Down       | 0.0001920  | Gmnn       | geminin [MGI:1927344]                                                            |
| 362 | -120,519,016,392,804 | Down       | 8.91E+03   | Gpcpd1     | glycerophosphocholine phosphodiesterase 1 [MGI:104898]                           |
| 363 | 125,831,175,898,387  | Ups        | 0.0002509  | Gpr141     | G protein-coupled receptor 141 [MGI:2672983]                                     |
| 364 | -18,057,246,690,279  | Down       | 9.40E+02   | Gpsm2      | G-protein signalling modulator 2 (AGS3-like%2C C. elegans) [MGI:1923373]         |
| 365 | -197,553,063,384,887 | Down       | 0.00381745 | Gpx7       | glutathione peroxidase 7 [MGI:1914555]                                           |
| 366 | 115,503,526,999,931  | Ups        | 4.90E+08   | Gvin3      | GTPase%2C very large interferon inducible%2C family member 3 [MGI:3584360]       |
| 367 | -548,303,720,230,752 | Down       | 6.99E+01   | Gypa       | glycophorin A [MGI:95880]                                                        |
| 368 | -214,660,550,948,327 | Down       | 7.62E-06   | Gypc       | glycophorin C [MGI:1098566]                                                      |
| 369 | -197,278,062,166,552 | Down       | 4.60E+09   | H1f1       | H1.1 linker histone%2C cluster member [MGI:1931523]                              |
| 370 | -244,862,750,509,457 | Down       | 1.13E+02   | H1f3       | H1.3 linker histone%2C cluster member [MGI:107502]                               |
| 371 | -126,187,862,308,656 | Down       | 5.83E+05   | H1f4       | H1.4 linker histone%2C cluster member [MGI:1931527]                              |
| 372 | -182,655,285,883,368 | Down       | 7.39E+00   | H1f5       | H1.5 linker histone%2C cluster member [MGI:1861461]                              |
| 373 | -115,268,492,197,218 | Down       | 0.0017093  | H2ac15     | H2A clustered histone 15 [MGI:2448297]                                           |
| 374 | -309,904,118,629,158 | Down       | 1.62E+08   | H2ac20     | H2A clustered histone 20 [MGI:2448316]                                           |
| 375 | -241,421,542,997,284 | Down       | 4.70E+06   | H2ac23     | H2A clustered histone 23 [MGI:2448302]                                           |
| 376 | -308,169,201,419,579 | Down       | 1.88E+08   | H2ac24     | H2A clustered histone 24 [MGI:3710573]                                           |
| 377 | -239,304,775,617,304 | Down       | 0.00063000 | H2ac4      | H2A clustered histone 4 [MGI:2448306]                                            |
| 378 | -269,819,804,184,782 | Down       | 0.00147001 | H2ac8      | H2A clustered histone 8 [MGI:2448290]                                            |

| No  | log2FoldChange       | Regulation | pvalue    | GeneSymbol | Description                                                                                 |
|-----|----------------------|------------|-----------|------------|---------------------------------------------------------------------------------------------|
| 379 | -136,746,640,718,411 | Down       | 1.49E+01  | H2ax       | H2A.X variant histone [MGI:102688]                                                          |
| 380 | -195,824,652,217,105 | Down       | 4.54E+09  | H2bc13     | H2B clustered histone 13 [MGI:2448403]                                                      |
| 381 | -105,080,045,759,295 | Down       | 6.04E+03  | H2bc4      | H2B clustered histone 4 [MGI:1915274]                                                       |
| 382 | -429,346,412,739,036 | Down       | 0.0004277 | H2bu2      | H2B.U histone 2 [MGI:1925553]                                                               |
| 383 | -152,941,744,575,309 | Down       | 0.0011289 | H3c11      | H3 clustered histone 11 [MGI:2448350]                                                       |
| 384 | -234,292,817,755,685 | Down       | 2.76E+09  | H4c14      | H4 clustered histone 14 [MGI:2140113]                                                       |
| 385 | -216,752,722,491,795 | Down       | 0.002328  | H4c3       | H4 clustered histone 3 [MGI:2448421]                                                        |
| 386 | -148,558,794,140,707 | Down       | 8.23E+08  | H4c4       | H4 clustered histone 4 [MGI:2448423]                                                        |
| 387 | -176,636,608,348,262 | Down       | 1.52E+05  | H4f16      | H4 histone 16 [MGI:2448443]                                                                 |
| 388 | -167,097,806,228,267 | Down       | 3.59E+06  | Hace1      | HECT domain and ankyrin repeat containing%2C E3 ubiquitin protein ligase 1 [MGI:2446110]    |
| 389 | 144,753,415,356,626  | Ups        | 0.0023451 | Hapln4     | hyaluronan and proteoglycan link protein 4 [MGI:2679531]                                    |
| 390 | -127,170,010,632,756 | Down       | 5.93E+09  | Haus8      | 4HAUS augmin-like complex%2C subunit 8 [MGI:1923728]                                        |
| 391 | -355,056,797,953,788 | Down       | 8.68E-38  | Hba-a1     | hemoglobin alpha%2C adult chain 1 [MGI:96015]                                               |
| 392 | -490,429,576,090,338 | Down       | 2.79E+06  | Hba-a2     | hemoglobin alpha%2C adult chain 2 [MGI:96016]                                               |
| 393 | -350,667,409,480,971 | Down       | 7.38E-22  | Hbb-bs     | hemoglobin%2C beta adult s chain [MGI:5474852]                                              |
| 394 | -440,627,659,169,401 | Down       | 9.28E-51  | Hbb-bt     | hemoglobin%2C beta adult t chain [MGI:5474850]                                              |
| 395 | -427,319,393,735,958 | Down       | 2.87E-02  | Hbq1b      | hemoglobin%2C theta 1B [MGI:3613460]                                                        |
| 396 | -125,525,497,271,606 | Down       | 4.00E+00  | Hectd4     | HECT domain E3 ubiquitin protein ligase 4 [MGI:3647820]                                     |
| 397 | -509,724,271,334,329 | Down       | 1.19E+09  | Hemgn      | hemogen [MGI:2136910]                                                                       |
| 398 | -283,780,840,800,154 | Down       | 8.38E-40  | Hmbs       | hydroxymethylbilane synthase [MGI:96112]                                                    |
| 399 | 102,497,149,922,809  | Ups        | 0.001251  | Hmga1      | high mobility group AT-hook 1 [MGI:96160]                                                   |
| 400 | -124,095,091,764,513 | Down       | 2.28E+02  | Hmgb2      | high mobility group box 2 [MGI:96157]                                                       |
| 401 | -194,245,402,979,536 | Down       | 0.0004910 | Hsd3b5     | hydroxy-delta-5-steroid dehydrogenase%2C 3 beta- and steroid delta-isomerase 5 [MGI:104645] |
| 402 | 106,550,898,066,082  | Ups        | 1.16E-38  | Ifi204     | interferon activated gene 204 [MGI:96429]                                                   |
| 403 | 133,873,252,853,677  | Ups        | 1.65E-08  | Ifi206     | interferon activated gene 206 [MGI:3646410]                                                 |
| 404 | 116,233,763,451,878  | Ups        | 9.46E+09  | Ifi208     | interferon activated gene 208 [MGI:2442822]                                                 |
| 405 | 131,499,813,677,011  | Ups        | 7.61E+01  | Ifi213     | interferon activated gene 213 [MGI:3695276]                                                 |
| 406 | -467,208,678,222,942 | Down       | 0.02503   | Ifi441     | interferon-induced protein 44 like [MGI:95975]                                              |
| 407 | -352,441,339,801,377 | Down       | 0.038499  | Ifitm7     | interferon induced transmembrane protein 7 [MGI:1921732]                                    |
| 408 | -105,344,449,381,285 | Down       | 1.55E+06  | Ifrd2      | interferon-related developmental regulator 2 [MGI:1316708]                                  |
| 409 | -105,344,449,381,285 | Down       | 2.33E+00  | Ifrd2      | interferon-related developmental regulator 2 [MGI:1316708]                                  |
| 410 | 106,261,099,511,468  | Ups        | 1.70E+07  | Igha       | immunoglobulin heavy constant alpha [MGI:96444]                                             |
| 411 | 663,798,608,277,037  | Ups        | 5.39E+09  | Ighv1-19   | immunoglobulin heavy variable V1-19 [MGI:4439779]                                           |
| 412 | 433,933,453,890,947  | Ups        | 6.79E+09  | Ighv1-22   | immunoglobulin heavy variable 1-22 [MGI:4439784]                                            |
| 413 | 364,387,858,800,462  | Ups        | 1.94E+05  | Ighv1-26   | immunoglobulin heavy variable 1-26 [MGI:4439641]                                            |
| 414 | 49,431,456,791,877   | Ups        | 3.28E+09  | Ighv1-39   | immunoglobulin heavy variable 1-39 [MGI:4439888]                                            |
| 415 | 481,849,414,361,389  | Ups        | 0.0004328 | Ighv1-72   | immunoglobulin heavy variable 1-72 [MGI:4439633]                                            |
| 416 | 277,105,638,943,079  | Ups        | 0.0010861 | Ighv9-3    | immunoglobulin heavy variable V9-3 [MGI:3642720]                                            |
| 417 | 130,110,828,495,165  | Ups        | 0.001579  | Igkv1-117  | immunoglobulin kappa variable 1-117 [MGI:4439721]                                           |
| 418 | -255,507,073,473,619 | Down       | 0.0023505 | Igkv1-135  | immunoglobulin kappa variable 1-135 [MGI:3819952]                                           |

| No  | log2FoldChange       | Regulation | pvalue    | GeneSymbol | Description                                                                                                 |
|-----|----------------------|------------|-----------|------------|-------------------------------------------------------------------------------------------------------------|
| 419 | 319,972,500,735,145  | Ups        | 0.0034982 | Igkv4-57   | immunoglobulin kappa variable 4-57 [MGI:2685035]                                                            |
| 420 | 369,553,549,681,422  | Ups        | 5.18E+07  | Igkv6-23   | immunoglobulin kappa variable 6-23 [MGI:3711980]                                                            |
| 421 | 11,642,690,128,155   | Ups        | 7.26E+00  | ligp1      | interferon inducible GTPase 1 [MGI:1926259]                                                                 |
| 422 | 290,226,373,798,985  | Ups        | 3.27E+08  | Il27       | interleukin 27 [MGI:2384409]                                                                                |
| 423 | -120,547,341,474,102 | Down       | 3.80E+04  | Incenp     | inner centromere protein [MGI:1313288]                                                                      |
| 424 | -299,399,426,802,496 | Down       | 7.59E-30  | Isg20      | interferon-stimulated protein [MGI:1928895]                                                                 |
| 425 | -299,399,426,802,496 | Down       | 1.13E+06  | Isg20      | interferon-stimulated protein [MGI:1928895]                                                                 |
| 426 | 173,539,116,976,819  | Ups        | 0.0015285 | Izumo4     | IZUMO family member 4 [MGI:1918814]                                                                         |
| 427 | -218,074,286,186,601 | Down       | 2.24E-03  | Josd2      | Josephin domain containing 2 [MGI:1913374]                                                                  |
| 428 | -256,847,691,404,235 | Down       | 2.27E-07  | Kcnn4      | potassium intermediate/small conductance calcium-activated channel%2C subfamily N%2C member 4 [MGI:1277957] |
| 429 | 280,708,941,076,625  | Ups        | 3.69E+06  | Kcnt2      | potassium channel%2C subfamily T%2C member 2 [MGI:3036273]                                                  |
| 430 | -274,681,006,876,443 | Down       | 3.05E+09  | Kctd14     | potassium channel tetramerisation domain containing 14 [MGI:1289222]                                        |
| 431 | -506,293,551,976,762 | Down       | 1.75E-25  | Kel        | Kell blood group [MGI:1346053]                                                                              |
| 432 | -154,627,340,092,099 | Down       | 3.10E+00  | Kif11      | kinesin family member 11 [MGI:1098231]                                                                      |
| 433 | -208,963,375,082,933 | Down       | 6.17E+04  | Kif14      | kinesin family member 14 [MGI:1098226]                                                                      |
| 434 | -151,227,891,741,848 | Down       | 4.08E+06  | Kif15      | kinesin family member 15 [MGI:1098258]                                                                      |
| 435 | -232,090,842,353,604 | Down       | 2.50E+01  | Kif18a     | kinesin family member 18A [MGI:2446977]                                                                     |
| 436 | -216,691,204,536,037 | Down       | 4.86E+03  | Kif18b     | kinesin family member 18B [MGI:2446979]                                                                     |
| 437 | -127,646,655,802,484 | Down       | 0.0001016 | Kif20a     | kinesin family member 20A [MGI:1201682]                                                                     |
| 438 | -110,570,250,665,145 | Down       | 5.71E+08  | Kif20b     | kinesin family member 20B [MGI:2444576]                                                                     |
| 439 | -19,988,493,378,916  | Down       | 5.61E+00  | Kif22      | kinesin family member 22 [MGI:109233]                                                                       |
| 440 | -131,664,045,645,185 | Down       | 1.89E+04  | Kif23      | kinesin family member 23 [MGI:1919069]                                                                      |
| 441 | -20,813,460,874,639  | Down       | 1.06E+00  | Kif4       | kinesin family member 4 [MGI:108389]                                                                        |
| 442 | -179,340,906,136,944 | Down       | 1.96E+08  | Kifc1      | kinesin family member C1 [MGI:109596]                                                                       |
| 443 | -373,084,278,884,926 | Down       | 1.47E+04  | Klf1       | Kruppel-like factor 1 (erythroid) [MGI:1342771]                                                             |
| 444 | -149,684,739,020,354 | Down       | 2.73E+03  | Klhl12     | kelch-like 12 [MGI:2385619]                                                                                 |
| 445 | -105,213,519,586,319 | Down       | 6.57E+08  | Klhl25     | kelch-like 25 [MGI:2668031]                                                                                 |
| 446 | -173,958,110,653,479 | Down       | 3.81E-05  | Kn11       | kinetochore scaffold 1 [MGI:1923714]                                                                        |
| 447 | -20,551,740,355,432  | Down       | 2.45E+06  | Kntc1      | kinetochore associated 1 [MGI:2673709]                                                                      |
| 448 | -136,879,085,877,215 | Down       | 2.78E+01  | Lbr        | lamin B receptor [MGI:2138281]                                                                              |
| 449 | -160,689,747,517,881 | Down       | 3.08E+09  | Ldc1       | leucine decarboxylase 1 [MGI:2685699]                                                                       |
| 450 | -128,510,782,337,841 | Down       | 8.15E+06  | Lig1       | ligase I%2C DNA%2C ATP-dependent [MGI:101789]                                                               |
| 451 | -164,299,151,159,036 | Down       | 6.34E-02  | Lmo2       | LIM domain only 2 [MGI:102811]                                                                              |
| 452 | -322,834,823,567,456 | Down       | 1.91E+06  | Lockd      | lncRNA downstream of Cdkn1b [MGI:1915081]                                                                   |
| 453 | -185,455,346,362,849 | Down       | 1.30E-01  | Lpcat1     | lysophosphatidylcholine acyltransferase 1 [MGI:2384812]                                                     |
| 454 | 112,292,003,085,685  | Ups        | 1.91E+06  | Manba      | mannosidase%2C beta A%2C lysosomal [MGI:88175]                                                              |
| 455 | -101,393,548,617,564 | Down       | 2.16E+07  | Map4k5     | mitogen-activated protein kinase kinase kinase kinase 5 [MGI:1925503]                                       |
| 456 | -175,823,293,389,974 | Down       | 2.98E-16  | Marchf2    | membrane associated ring-CH-type finger 2 [MGI:1925915]                                                     |
| 457 | -15,617,283,912,961  | Down       | 1.11E+09  | Marchf3    | membrane associated ring-CH-type finger 3 [MGI:2443667]                                                     |
| 458 | -112,834,504,187,481 | Down       | 0.0001677 | Mboat2     | membrane bound O-acyltransferase domain containing 2 [MGI:1914466]                                          |

| No  | log2FoldChange       | Regulation | pvalue    | GeneSymbol | Description                                                                      |
|-----|----------------------|------------|-----------|------------|----------------------------------------------------------------------------------|
| 459 | -11,968,874,738,445  | Down       | 4.24E+09  | Mcm10      | minichromosome maintenance 10 replication initiation factor [MGI:1917274]        |
| 460 | -147,601,275,595,337 | Down       | 9.64E+03  | Mcm2       | minichromosome maintenance complex component 2 [MGI:105380]                      |
| 461 | -109,133,658,881,908 | Down       | 3.61E+08  | Mcm4       | minichromosome maintenance complex component 4 [MGI:103199]                      |
| 462 | -125,144,963,044,702 | Down       | 2.96E+06  | Mcm5       | minichromosome maintenance complex component 5 [MGI:103197]                      |
| 463 | -114,454,823,487,603 | Down       | 9.81E+05  | Mcm6       | minichromosome maintenance complex component 6 [MGI:1298227]                     |
| 464 | -129,008,818,308,956 | Down       | 6.67E+03  | Mcm7       | minichromosome maintenance complex component 7 [MGI:1298398]                     |
| 465 | -119,314,605,650,307 | Down       | 5.32E+03  | Memo1      | mediator of cell motility 1 [MGI:1924140]                                        |
| 466 | -103,732,668,481,372 | Down       | 3.15E+06  | Mep1b      | meprin 1 beta [MGI:96964]                                                        |
| 467 | -100,083,810,263,603 | Down       | 1.33E+06  | Metap2     | methionine aminopeptidase 2 [MGI:1929701]                                        |
| 468 | -240,560,816,818,328 | Down       | 2.11E+04  | Micall2    | MICAL-like 2 [MGI:2444818]                                                       |
| 469 | -18,187,559,896,186  | Down       | 1.50E+05  | Mis18bp1   | MIS18 binding protein 1 [MGI:2145099]                                            |
| 470 | -210,927,899,210,811 | Down       | 6.50E-22  | Mki67      | antigen identified by monoclonal antibody Ki 67 [MGI:106035]                     |
| 471 | -191,912,572,083,549 | Down       | 4.70E-06  | Mkrn1      | makorin%2C ring finger protein%2C 1 [MGI:1859353]                                |
| 472 | -198,785,608,701,946 | Down       | 1.86E+08  | Mns1       | meiosis-specific nuclear structural protein 1 [MGI:107933]                       |
| 473 | -204,989,281,406,497 | Down       | 3.25E+05  | Mpp2       | membrane protein%2C palmitoylated 2 (MAGUK p55 subfamily member 2) [MGI:1858257] |
| 474 | -117,029,237,207,137 | Down       | 6.68E+05  | Mpv17l     | Mpv17 transgene%2C kidney disease mutant-like [MGI:2135951]                      |
| 475 | 130,166,166,463,676  | Ups        | 0.0033213 | Ms4a3      | membrane-spanning 4-domains%2C subfamily A%2C member 3 [MGI:2158468]             |
| 476 | 141,058,055,378,595  | Ups        | 0.002245  | Ms4a6d     | membrane-spanning 4-domains%2C subfamily A%2C member 6D [MGI:1916024]            |
| 477 | -214,895,237,321,952 | Down       | 7.43E+08  | mt-Nd3     | mitochondrially encoded NADH dehydrogenase 3 [MGI:102499]                        |
| 478 | -329,977,657,750,103 | Down       | 0.0001980 | Mup2       | major urinary protein 2 [MGI:97234]                                              |
| 479 | -278,291,070,252,598 | Down       | 0.0028357 | Mup20      | major urinary protein 20 [MGI:3651981]                                           |
| 480 | -139,313,148,190,137 | Down       | 2.56E+02  | Mxd1       | MAX dimerization protein 1 [MGI:96908]                                           |
| 481 | -269,455,584,477,097 | Down       | 5.62E+02  | Mxd3       | Max dimerization protein 3 [MGI:104987]                                          |
| 482 | -221,545,048,475,386 | Down       | 1.73E+02  | Mybl2      | myeloblastosis oncogene-like 2 [MGI:101785]                                      |
| 483 | 113,959,363,647,704  | Ups        | 9.31E+08  | Naaa       | N-acylethanolamine acid amidase [MGI:1914361]                                    |
| 484 | -120,841,621,530,531 | Down       | 8.76E-01  | Narf       | nuclear prelamin A recognition factor [MGI:1914858]                              |
| 485 | -136,440,288,789,404 | Down       | 5.02E+02  | Ncapd2     | non-SMC condensin I complex%2C subunit D2 [MGI:1915548]                          |
| 486 | -105,130,142,016,084 | Down       | 2.94E+08  | Ncapd3     | non-SMC condensin II complex%2C subunit D3 [MGI:2142989]                         |
| 487 | -146,747,371,987,443 | Down       | 3.31E+05  | Ncapg      | non-SMC condensin I complex%2C subunit G [MGI:1930197]                           |
| 488 | -213,354,993,857,359 | Down       | 4.43E-04  | Ncapg2     | non-SMC condensin II complex%2C subunit G2 [MGI:1923294]                         |
| 489 | -143,293,754,397,778 | Down       | 4.32E+06  | Ncaph      | non-SMC condensin I complex%2C subunit H [MGI:2444777]                           |
| 490 | -128,738,427,556,847 | Down       | 4.04E+08  | Ndc80      | NDC80 kinetochore complex component [MGI:1914302]                                |
| 491 | -231,582,337,402,602 | Down       | 1.73E+07  | Neil3      | nei like 3 (E. coli) [MGI:2384588]                                               |
| 492 | -152,842,355,594,578 | Down       | 0.0025070 | Neu3       | neuraminidase 3 [MGI:1355305]                                                    |
| 493 | -249,536,877,134,254 | Down       | 3.44E-13  | Nfe2       | nuclear factor%2C erythroid derived 2 [MGI:97308]                                |
| 494 | -164,150,559,802,737 | Down       | 2.68E+09  | Nipal1     | non imprinted in Prader-Willi/Angelman syndrome 1 homolog (human) [MGI:2442058]  |
| 495 | -1,466,498,824,714   | Down       | 1.20E+07  | Nr0b2      | nuclear receptor subfamily 0%2C group B%2C member 2 [MGI:1346344]                |
| 496 | -109,176,036,595,858 | Down       | 3.81E+08  | Nrep       | neuronal regeneration related protein [MGI:99444]                                |
| 497 | -244,311,901,970,211 | Down       | 0.000375  | Nrip3      | nuclear receptor interacting protein 3 [MGI:1925843]                             |
| 498 | -15,677,379,442,245  | Down       | 3.03E-08  | Nt5c3      | 5'-nucleotidase%2C cytosolic III [MGI:1927186]                                   |



| No  | log2FoldChange       | Regulation | pvalue    | GeneSymbol | Description                                                               |
|-----|----------------------|------------|-----------|------------|---------------------------------------------------------------------------|
| 499 | -177,373,806,663,249 | Down       | 0.000462  | Nudt7      | nudix (nucleoside diphosphate linked moiety X)-type motif 7 [MGI:1914778] |
| 500 | -155,431,906,414,549 | Down       | 3.60E+08  | Nuf2       | NUF2%2C NDC80 kinetochore complex component [MGI:1914227]                 |
| 501 | -198,319,508,927,985 | Down       | 1.09E-06  | Nusap1     | nucleolar and spindle associated protein 1 [MGI:2675669]                  |
| 502 | -28,398,293,565,817  | Down       | 1.68E+03  | Nxpe2      | neurexophilin and PC-esterase domain family%2C member 2 [MGI:1925502]     |
| 503 | -127,215,976,099,217 | Down       | 0.000797  | Nxpe4      | neurexophilin and PC-esterase domain family%2C member 4 [MGI:1924792]     |
| 504 | -238,320,275,085,706 | Down       | 5.60E+09  | Odc1       | ornithine decarboxylase%2C structural 1 [MGI:97402]                       |
| 505 | -165,553,659,977,282 | Down       | 0.0004733 | Oip5       | Opa interacting protein 5 [MGI:1917895]                                   |
| 506 | 108,096,684,549,679  | Ups        | 0.0024892 | Olfm3      | olfactomedin 3 [MGI:2387329]                                              |
| 507 | -283,257,720,925,897 | Down       | 2.21E+06  | Orc1       | origin recognition complex%2C subunit 1 [MGI:1328337]                     |
| 508 | -144,347,372,912,144 | Down       | 2.70E+09  | Orc6       | origin recognition complex%2C subunit 6 [MGI:1929285]                     |
| 509 | 35,599,788,502,309   | Ups        | 0.0001412 | Orm3       | orosomucoid 3 [MGI:97445]                                                 |
| 510 | -160,476,670,113,121 | Down       | 8.02E+06  | Otub2      | OTU domain%2C ubiquitin aldehyde binding 2 [MGI:1915399]                  |
| 511 | -126,804,699,645,487 | Down       | 3.82E+02  | Pabpc4     | poly(A) binding protein%2C cytoplasmic 4 [MGI:2385206]                    |
| 512 | -163,782,650,183,335 | Down       | 1.38E+07  | Pbk        | PDZ binding kinase [MGI:1289156]                                          |
| 513 | -112,480,043,749,025 | Down       | 1.14E+06  | Pck2       | phosphoenolpyruvate carboxykinase 2 (mitochondrial) [MGI:1860456]         |
| 514 | -154,006,288,151,557 | Down       | 6.26E-02  | Pcna       | proliferating cell nuclear antigen [MGI:97503]                            |
| 515 | -236,313,007,641,399 | Down       | 3.01E+09  | Pcyt1b     | phosphate cytidyltransferase 1%2C choline%2C beta isoform [MGI:2147987]   |
| 516 | -268,000,622,927,342 | Down       | 1.27E+06  | Pheta2     | PH domain containing endocytic trafficking adaptor 2 [MGI:2443609]        |
| 517 | -23,417,394,832,979  | Down       | 6.83E+09  | Phyhip     | phytanoyl-CoA hydroxylase interacting protein [MGI:1860417]               |
| 518 | -199,852,186,382,617 | Down       | 0.0006105 | Pif1       | PIF1 5'-to-3' DNA helicase [MGI:2143057]                                  |
| 519 | -114,391,678,915,603 | Down       | 6.06E+09  | Piga       | phosphatidylinositol glycan anchor biosynthesis%2C class A [MGI:99461]    |
| 520 | -165,862,956,493,817 | Down       | 9.08E+08  | Pip5k1b    | phosphatidylinositol-4-phosphate 5-kinase%2C type 1 beta [MGI:107930]     |
| 521 | -422,190,191,000,692 | Down       | 1.17E-04  | Pkhd11l    | polycystic kidney and hepatic disease 1-like 1 [MGI:2183153]              |
| 522 | -133,554,728,906,919 | Down       | 0.0016432 | Pkmyt1     | protein kinase%2C membrane associated tyrosine/threonine 1 [MGI:2137630]  |
| 523 | -103,021,451,304,107 | Down       | 5.56E+08  | Plaat3     | phospholipase A and acyltransferase 3 [MGI:2179715]                       |
| 524 | -121,841,781,188,322 | Down       | 8.07E+06  | Plcl2      | phospholipase C-like 2 [MGI:1352756]                                      |
| 525 | -137,785,440,108,057 | Down       | 0.0003704 | Plek2      | pleckstrin 2 [MGI:1351466]                                                |
| 526 | -51,058,690,483,613  | Down       | 3.97E+09  | Pnp2       | purine-nucleoside phosphorylase 2 [MGI:3712328]                           |
| 527 | -103,722,822,186,076 | Down       | 0.002401  | Pole       | polymerase (DNA directed)%2C epsilon [MGI:1196391]                        |
| 528 | -180,747,496,266,943 | Down       | 1.33E+09  | Polq       | polymerase (DNA directed)%2C theta [MGI:2155399]                          |
| 529 | -518,918,573,405,362 | Down       | 0.000159  | Popdc2     | popeye domain containing 2 [MGI:1930150]                                  |
| 530 | -169,357,880,429,875 | Down       | 1.78E+02  | Ppox       | protoporphyrinogen oxidase [MGI:104968]                                   |
| 531 | -274,613,209,562,544 | Down       | 4.82E-27  | Ppp1r15a   | protein phosphatase 1%2C regulatory subunit 15A [MGI:1927072]             |
| 532 | 164,062,400,649,655  | Ups        | 1.81E-01  | Ppp1r3b    | protein phosphatase 1%2C regulatory subunit 3B [MGI:2177268]              |
| 533 | 13,069,898,470,993   | Ups        | 0.0030755 | Ppp1r3c    | protein phosphatase 1%2C regulatory subunit 3C [MGI:1858229]              |
| 534 | -199,819,512,800,083 | Down       | 1.14E+00  | Prc1       | protein regulator of cytokinesis 1 [MGI:1858961]                          |
| 535 | -190,791,695,692,574 | Down       | 3.80E-09  | Prdx2      | peroxiredoxin 2 [MGI:109486]                                              |
| 536 | -142,152,055,452,488 | Down       | 1.71E+09  | Prim2      | DNA primase%2C p58 subunit [MGI:97758]                                    |
| 537 | -113,546,280,622,297 | Down       | 1.21E+07  | Prkar2b    | protein kinase%2C cAMP dependent regulatory%2C type II beta [MGI:97760]   |
| 538 | 136,953,453,811,802  | Ups        | 0.0007313 | Prss34     | protease%2C serine 34 [MGI:2681414]                                       |

| No  | log2FoldChange       | Regulation | pvalue    | GeneSymbol | Description                                                                   |
|-----|----------------------|------------|-----------|------------|-------------------------------------------------------------------------------|
| 539 | -113,258,492,297,175 | Down       | 1.09E+04  | Ptdss2     | phosphatidylserine synthase 2 [MGI:1351664]                                   |
| 540 | -143,612,542,340,299 | Down       | 2.87E-05  | Ptp4a3     | protein tyrosine phosphatase 4a3 [MGI:1277098]                                |
| 541 | -19,380,923,233,513  | Down       | 2.93E-13  | Rab3il1    | RAB3A interacting protein (rabin3)-like 1 [MGI:1922010]                       |
| 542 | -190,842,912,053,619 | Down       | 4.75E-20  | Rad23a     | RAD23 homolog A%2C nucleotide excision repair protein [MGI:105126]            |
| 543 | -157,880,208,250,406 | Down       | 1.06E+07  | Rad51      | RAD51 recombinase [MGI:97890]                                                 |
| 544 | -142,348,721,712,068 | Down       | 0.0008486 | Rad51ap1   | RAD51 associated protein 1 [MGI:1098224]                                      |
| 545 | -15,294,397,934,353  | Down       | 0.0002489 | Rad54l     | RAD54 like ( <i>S. cerevisiae</i> ) [MGI:894697]                              |
| 546 | -187,055,461,686,305 | Down       | 1.09E-22  | Ranbp10    | RAN binding protein 10 [MGI:1921584]                                          |
| 547 | -112,198,673,482,816 | Down       | 8.21E+08  | Rarres1    | retinoic acid receptor responder (tazarotene induced) 1 [MGI:1924461]         |
| 548 | -229,015,300,712,318 | Down       | 4.13E-19  | Rbm38      | RNA binding motif protein 38 [MGI:1889294]                                    |
| 549 | -241,266,364,742,726 | Down       | 0.0030583 | Recql4     | RecQ protein-like 4 [MGI:1931028]                                             |
| 550 | -113,331,029,232,726 | Down       | 0.0001828 | Reep4      | receptor accessory protein 4 [MGI:1919799]                                    |
| 551 | -943,823,832,888,101 | Down       | 0.000741  | Reg3a      | regenerating islet-derived 3 alpha [MGI:109408]                               |
| 552 | -118,953,511,401,736 | Down       | 0.003701  | Retnlg     | resistin like gamma [MGI:2667763]                                             |
| 553 | -130,872,795,112,319 | Down       | 1.19E+08  | Rfc4       | replication factor C (activator 1) 4 [MGI:2146571]                            |
| 554 | -217,789,024,843,323 | Down       | 8.74E+04  | Rfx2       | regulatory factor X%2C 2 (influences HLA class II expression) [MGI:106583]    |
| 555 | -115,211,431,863,784 | Down       | 7.14E+09  | Rgs12      | regulator of G-protein signaling 12 [MGI:1918979]                             |
| 556 | -410,506,600,678,075 | Down       | 1.47E+05  | Rhag       | Rhesus blood group-associated A glycoprotein [MGI:1202713]                    |
| 557 | -54,182,571,062,468  | Down       | 1.29E+05  | Rhd        | Rh blood group%2C D antigen [MGI:1202882]                                     |
| 558 | -110,444,912,259,562 | Down       | 2.23E+04  | Rnf123     | ring finger protein 123 [MGI:2148796]                                         |
| 559 | -380,686,254,609,759 | Down       | 5.13E+09  | Rnf212     | ring finger protein 212 [MGI:3645767]                                         |
| 560 | -144,000,192,023,664 | Down       | 4.71E+06  | Rnf24      | ring finger protein 24 [MGI:1261771]                                          |
| 561 | -173,222,591,805,489 | Down       | 0.0025895 | Rpl10a-ps4 | ribosomal protein L10A%2C pseudogene 4 [MGI:3652221]                          |
| 562 | 348,393,704,895,491  | Ups        | 3.07E+02  | Rps24-ps3  | ribosomal protein S24%2C pseudogene 3 [MGI:3644407]                           |
| 563 | -611,133,982,388,721 | Down       | 2.25E-10  | Rps3a3     | ribosomal protein S3A3 [MGI:3643406]                                          |
| 564 | -156,241,340,525,208 | Down       | 3.68E+00  | Rrm1       | ribonucleotide reductase M1 [MGI:98180]                                       |
| 565 | -255,767,937,548,605 | Down       | 2.65E-21  | Rrm2       | ribonucleotide reductase M2 [MGI:98181]                                       |
| 566 | -316,912,043,287,825 | Down       | 1.15E-67  | Rsad2      | radical S-adenosyl methionine domain containing 2 [MGI:1929628]               |
| 567 | 305,974,693,616,435  | Ups        | 7.04E+09  | Saa2       | serum amyloid A 2 [MGI:98222]                                                 |
| 568 | 222,139,048,360,841  | Ups        | 3.93E+09  | Saa3       | serum amyloid A 3 [MGI:98223]                                                 |
| 569 | -117,141,628,631,457 | Down       | 4.45E+06  | Samd1      | sterile alpha motif domain containing 1 [MGI:2142433]                         |
| 570 | -436,637,884,958,386 | Down       | 3.48E+00  | Samd11     | sterile alpha motif domain containing 11 [MGI:2446220]                        |
| 571 | -184,040,821,773,928 | Down       | 8.38E+02  | Samd14     | sterile alpha motif domain containing 14 [MGI:2384945]                        |
| 572 | 204,717,866,052,733  | Ups        | 0.003733  | Serpina3c  | serine (or cysteine) peptidase inhibitor%2C clade A%2C member 3C [MGI:102848] |
| 573 | 110,097,643,081,289  | Ups        | 7.37E+09  | Serpina3n  | serine (or cysteine) peptidase inhibitor%2C clade A%2C member 3N [MGI:105045] |
| 574 | -243,050,063,964,413 | Down       | 2.64E+04  | Sgo1       | shugoshin 1 [MGI:1919665]                                                     |
| 575 | -102,113,878,178,909 | Down       | 0.000503  | Siva1      | SIVA1%2C apoptosis-inducing factor [MGI:1353606]                              |
| 576 | -241,908,068,597,165 | Down       | 1.17E+06  | Ska1       | spindle and kinetochore associated complex subunit 1 [MGI:1913718]            |
| 577 | -114,794,150,524,665 | Down       | 0.0020226 | Ska2       | spindle and kinetochore associated complex subunit 2 [MGI:1913390]            |
| 578 | -149,852,445,394,316 | Down       | 0.0015839 | Ska3       | spindle and kinetochore associated complex subunit 3 [MGI:3041235]            |

| No  | log2FoldChange       | Regulation | pvalue    | GeneSymbol | Description                                                                                      |
|-----|----------------------|------------|-----------|------------|--------------------------------------------------------------------------------------------------|
| 579 | -126,875,865,040,769 | Down       | 1.84E+05  | Slbp       | stem-loop binding protein [MGI:108402]                                                           |
| 580 | -168,460,793,554,664 | Down       | 3.84E+01  | Slc14a1    | solute carrier family 14 (urea transporter)%2C member 1 [MGI:1351654]                            |
| 581 | -14,098,009,920,707  | Down       | 1.07E-04  | Slc16a1    | solute carrier family 16 (monocarboxylic acid transporters)%2C member 1 [MGI:106013]             |
| 582 | -13,887,970,115,991  | Down       | 6.95E+07  | Slc16a6    | solute carrier family 16 (monocarboxylic acid transporters)%2C member 6 [MGI:2144585]            |
| 583 | -106,332,182,050,856 | Down       | 0.000506  | Slc25a21   | solute carrier family 25 (mitochondrial oxodicarboxylate carrier)%2C member 21 [MGI:2445059]     |
| 584 | -372,338,424,295,826 | Down       | 1.07E-82  | Slc25a37   | solute carrier family 25%2C member 37 [MGI:1914962]                                              |
| 585 | -163,953,030,999,418 | Down       | 7.84E+00  | Slc25a38   | solute carrier family 25%2C member 38 [MGI:2384782]                                              |
| 586 | -359,307,856,820,929 | Down       | 1.84E-18  | Slc38a5    | solute carrier family 38%2C member 5 [MGI:2148066]                                               |
| 587 | -325,621,839,510,778 | Down       | 1.06E-36  | Slc43a1    | solute carrier family 43%2C member 1 [MGI:1931352]                                               |
| 588 | -478,286,732,117,893 | Down       | 8.27E-51  | Slc4a1     | solute carrier family 4 (anion exchanger)%2C member 1 [MGI:109393]                               |
| 589 | -130,715,145,483,562 | Down       | 1.25E+07  | Slc6a9     | solute carrier family 6 (neurotransmitter transporter%2C glycine)%2C member 9 [MGI:95760]        |
| 590 | -374,182,960,414,886 | Down       | 3.35E-11  | Slfn14     | schlafen 14 [MGI:2684866]                                                                        |
| 591 | 14,243,290,941,868   | Ups        | 0.002319  | Slfn4      | schlafen 4 [MGI:1329010]                                                                         |
| 592 | -152,194,653,314,024 | Down       | 5.01E+03  | Smc2       | structural maintenance of chromosomes 2 [MGI:106067]                                             |
| 593 | -120,944,694,952,447 | Down       | 2.57E-01  | Smc4       | structural maintenance of chromosomes 4 [MGI:1917349]                                            |
| 594 | -282,458,031,163,433 | Down       | 4.76E-12  | Smox       | spermine oxidase [MGI:2445356]                                                                   |
| 595 | -331,359,775,148,167 | Down       | 4.01E-36  | SncA       | synuclein%2C alpha [MGI:1277151]                                                                 |
| 596 | -135,126,865,118,837 | Down       | 1.57E+06  | Snrnp25    | small nuclear ribonucleoprotein 25 (U11/U12) [MGI:1925622]                                       |
| 597 | -116,319,878,051,147 | Down       | 7.33E+08  | Snx15      | sorting nexin 15 [MGI:1916274]                                                                   |
| 598 | -343,718,365,533,452 | Down       | 4.51E+01  | Snx22      | sorting nexin 22 [MGI:2685966]                                                                   |
| 599 | -36,273,862,864,062  | Down       | 9.60E-06  | Sowaha     | sosondawah ankyrin repeat domain family member A [MGI:2687280]                                   |
| 600 | -148,464,388,852,889 | Down       | 3.42E-04  | Sox6       | SRY (sex determining region Y)-box 6 [MGI:98368]                                                 |
| 601 | -20,064,500,985,242  | Down       | 4.21E+04  | Spag5      | sperm associated antigen 5 [MGI:1927470]                                                         |
| 602 | -196,899,107,604,472 | Down       | 1.04E-12  | Specc1     | sperm antigen with calponin homology and coiled-coil domains 1 [MGI:2442356]                     |
| 603 | -115,803,984,906,765 | Down       | 0.001207  | Sphk1      | sphingosine kinase 1 [MGI:1316649]                                                               |
| 604 | -150,636,081,552,833 | Down       | 4.58E-02  | Spire1     | spire type actin nucleation factor 1 [MGI:1915416]                                               |
| 605 | -120,181,964,832,544 | Down       | 4.07E+06  | Sppl2b     | signal peptide peptidase like 2B [MGI:1920468]                                                   |
| 606 | -438,544,262,390,164 | Down       | 5.76E-07  | Sptal1     | spectrin alpha%2C erythrocytic 1 [MGI:98385]                                                     |
| 607 | -392,062,295,801,732 | Down       | 2.14E-04  | Sptb       | spectrin beta%2C erythrocytic [MGI:98387]                                                        |
| 608 | 115,580,697,839,885  | Ups        | 1.94E+08  | Steap4     | STEAP family member 4 [MGI:1923560]                                                              |
| 609 | -161,969,704,208,448 | Down       | 5.23E+09  | Stil       | Scf/Tal1 interrupting locus [MGI:107477]                                                         |
| 610 | -19,106,387,774,254  | Down       | 1.41E-07  | Stom       | stomatin [MGI:95403]                                                                             |
| 611 | 230,571,066,005,568  | Ups        | 4.01E+07  | Stra6      | stimulated by retinoic acid gene 6 [MGI:107742]                                                  |
| 612 | -141,004,656,326,803 | Down       | 8.64E+03  | Stx2       | syntaxin 2 [MGI:108059]                                                                          |
| 613 | -131,851,731,315,034 | Down       | 0.0011666 | Sult2a8    | sulfotransferase family 2A%2C dehydroepiandrosterone (DHEA)-preferring%2C member 8 [MGI:1924221] |
| 614 | -261,931,832,272,963 | Down       | 0.0007953 | Sult5a1    | sulfotransferase family 5A%2C member 1 [MGI:1931463]                                             |
| 615 | -14,190,324,205,154  | Down       | 2.46E+07  | Tacc3      | transforming%2C acidic coiled-coil containing protein 3 [MGI:1341163]                            |
| 616 | 503,623,170,106,161  | Ups        | 0.0002119 | Tafa2      | Tafa chemokine like family member 2 [MGI:2143691]                                                |
| 617 | -325,086,069,145,495 | Down       | 8.62E+05  | Tal1       | T cell acute lymphocytic leukemia 1 [MGI:98480]                                                  |
| 618 | -210,995,098,023,278 | Down       | 0.0002529 | Tbx10      | T-box 10 [MGI:1261436]                                                                           |

| No  | log2FoldChange       | Regulation | pvalue    | GeneSymbol | Description                                                                               |
|-----|----------------------|------------|-----------|------------|-------------------------------------------------------------------------------------------|
| 619 | -159,471,333,866,159 | Down       | 6.68E+07  | Tcf19      | transcription factor 19 [MGI:103180]                                                      |
| 620 | -248,896,660,669,509 | Down       | 1.68E-30  | Tent5c     | terminal nucleotidyltransferase 5C [MGI:1921895]                                          |
| 621 | -170,642,849,940,041 | Down       | 6.83E-11  | Tfdp2      | transcription factor Dp 2 [MGI:107167]                                                    |
| 622 | -358,566,486,448,122 | Down       | 1.56E+06  | Tff3       | trefoil factor 3%2C intestinal [MGI:104638]                                               |
| 623 | -230,606,655,703,201 | Down       | 0.000300  | Tiaf2      | TGF-beta1-induced anti-apoptotic factor 2 [MGI:2651383]                                   |
| 624 | 121,678,929,611,201  | Ups        | 8.70E+05  | Ticam2     | toll-like receptor adaptor molecule 2 [MGI:3040056]                                       |
| 625 | -17,466,672,340,227  | Down       | 4.26E+08  | Ticrr      | TOPBP1-interacting checkpoint and replication regulator [MGI:1924261]                     |
| 626 | 143,704,416,113,953  | Ups        | 5.38E+09  | Tifab      | TRAF-interacting protein with forkhead-associated domain%2C family member B [MGI:2385852] |
| 627 | -118,774,787,973,333 | Down       | 2.33E+08  | Tipin      | timeless interacting protein [MGI:1921571]                                                |
| 628 | -133,281,424,818,044 | Down       | 4.29E+05  | Tk1        | thymidine kinase 1 [MGI:98763]                                                            |
| 629 | -136,345,896,551,049 | Down       | 1.09E+07  | Tlcd2      | TLC domain containing 2 [MGI:1917141]                                                     |
| 630 | -465,699,628,759,296 | Down       | 9.31E-90  | Tmcc2      | transmembrane and coiled-coil domains 2 [MGI:1916125]                                     |
| 631 | -192,960,105,500,944 | Down       | 1.15E+08  | Tmem120b   | transmembrane protein 120B [MGI:3603158]                                                  |
| 632 | -411,430,459,234,418 | Down       | 5.80E-09  | Tmod1      | tropomodulin 1 [MGI:98775]                                                                |
| 633 | 148,687,301,380,935  | Ups        | 1.67E+08  | Tnfaip8l3  | tumor necrosis factor%2C alpha-induced protein 8-like 3 [MGI:2685363]                     |
| 634 | 169,436,520,457,026  | Ups        | 0.016550  | Tnip3      | TNFAIP3 interacting protein 3 [MGI:3041165]                                               |
| 635 | -138,388,896,993,875 | Down       | 5.80E-02  | Top2a      | topoisomerase (DNA) II alpha [MGI:98790]                                                  |
| 636 | -169,690,657,396,511 | Down       | 2.47E-01  | Tpx2       | TPX2%2C microtubule-associated [MGI:1919369]                                              |
| 637 | -126,434,600,160,647 | Down       | 2.70E-06  | Trak2      | trafficking protein%2C kinesin binding 2 [MGI:1918077]                                    |
| 638 | -576,628,164,768,095 | Down       | 2.12E-04  | Trim10     | tripartite motif-containing 10 [MGI:1338757]                                              |
| 639 | -42,834,272,518,085  | Down       | 1.02E-03  | Trim58     | tripartite motif-containing 58 [MGI:2684862]                                              |
| 640 | -221,169,706,295,654 | Down       | 1.84E-13  | Trim59     | tripartite motif-containing 59 [MGI:1914199]                                              |
| 641 | -126,651,330,473,817 | Down       | 0.001919  | Trmo       | tRNA methyltransferase O [MGI:1922003]                                                    |
| 642 | -237,957,976,739,466 | Down       | 0.0007837 | Troap      | trophinin associated protein [MGI:1925983]                                                |
| 643 | -220,821,382,406,845 | Down       | 5.00E-13  | Tspan33    | tetraspanin 33 [MGI:1919012]                                                              |
| 644 | -376,237,395,848,837 | Down       | 1.39E+03  | Tspo2      | translocator protein 2 [MGI:1917276]                                                      |
| 645 | -187,698,275,323,523 | Down       | 0.00018   | Ttk        | Ttk protein kinase [MGI:1194921]                                                          |
| 646 | -112,612,864,708,692 | Down       | 3.69E+06  | Txnrd2     | thioredoxin reductase 2 [MGI:1347023]                                                     |
| 647 | -148,908,660,646,242 | Down       | 2.41E+06  | Tyms       | thymidylate synthase [MGI:98878]                                                          |
| 648 | -118,163,444,196,841 | Down       | 0.00015   | Tyw3       | tRNA-yW synthesizing protein 3 homolog (S. cerevisiae) [MGI:2445040]                      |
| 649 | -215,276,792,522,191 | Down       | 2.20E-14  | Ubac1      | ubiquitin associated domain containing 1 [MGI:1920995]                                    |
| 650 | -246,261,782,626,932 | Down       | 8.75E-30  | Ube2c      | ubiquitin-conjugating enzyme E2C [MGI:1915862]                                            |
| 651 | -159,084,424,542,164 | Down       | 0.0005830 | Ube2l6     | ubiquitin-conjugating enzyme E2L 6 [MGI:1914500]                                          |
| 652 | -238,547,078,039,476 | Down       | 2.30E-22  | Ube2o      | ubiquitin-conjugating enzyme E2O [MGI:2444266]                                            |
| 653 | -116,147,202,945,734 | Down       | 1.81E+05  | Ube2s      | ubiquitin-conjugating enzyme E2S [MGI:1925141]                                            |
| 654 | -130,875,317,488,035 | Down       | 1.64E-01  | Ucp2       | uncoupling protein 2 (mitochondrial%2C proton carrier) [MGI:109354]                       |
| 655 | -174,727,432,181,203 | Down       | 2.26E-03  | Uhrf1      | ubiquitin-like%2C containing PHD and RING finger domains%2C 1 [MGI:1338889]               |
| 656 | -139,266,542,376,965 | Down       | 4.17E-06  | Urod       | uroporphyrinogen decarboxylase [MGI:98916]                                                |
| 657 | -265,529,372,240,203 | Down       | 7.31E-15  | Uros       | uroporphyrinogen III synthase [MGI:98917]                                                 |
| 658 | -184,979,512,375,868 | Down       | 9.17E-02  | Vopp1      | vesicular%2C overexpressed in cancer%2C prosurvival protein 1 [MGI:2141658]               |

| No  | log2FoldChange       | Regulation | pvalue   | GeneSymbol | Description                                               |
|-----|----------------------|------------|----------|------------|-----------------------------------------------------------|
| 659 | -185,043,083,843,207 | Down       | 2.15E+04 | Wdhd1      | WD repeat and HMG-box DNA binding protein 1 [MGI:2443514] |
| 660 | -174,863,785,236,771 | Down       | 2.31E+06 | Xk         | X-linked Kx blood group [MGI:103569]                      |
| 661 | -17,940,655,608,949  | Down       | 2.62E-16 | Xpo7       | exportin 7 [MGI:1929705]                                  |
| 662 | -796,568,528,538,149 | Down       | 4.51E+03 | Ypel4      | yippee like 4 [MGI:3605071]                               |
| 663 | 122,983,874,261,716  | Ups        | 0.00011  | Zbtb16     | zinc finger and BTB domain containing 16 [MGI:103222]     |
| 664 | -121,754,966,844,225 | Down       | 7.84E+07 | Zfp367     | zinc finger protein 367 [MGI:2442266]                     |
| 665 | -198,505,344,246,177 | Down       | 1.23E-08 | Zfpm1      | zinc finger protein%2C multitype 1 [MGI:1095400]          |

## Supplementary Table S2B

| No | GeneSymbol | log2FoldChange       | Regulation | pvalue               | Description                                          |
|----|------------|----------------------|------------|----------------------|------------------------------------------------------|
| 1  | Arrb1      | -126,682,184,625,746 | Down       | 3.85E+09             | arrestin%2C beta 1 [MGI:99473]                       |
| 2  | Ccr8       | -249,257,209,704,091 | Down       | 0.00541197569589675  | chemokine (C-C motif) receptor 8 [MGI:1201402]       |
| 3  | Ccl1       | -224,763,623,519,066 | Down       | 0.0161466172851243   | chemokine (C-C motif) ligand 1 [MGI:98258]           |
| 4  | Ccl7       | -166,827,998,525,313 | Down       | 1.03E+08             | chemokine (C-C motif) ligand 7 [MGI:99512]           |
| 5  | Cxcl5      | -112,385,380,828,418 | Down       | 0.0361351883780983   | chemokine (C-X-C motif) ligand 5 [MGI:1096868]       |
| 6  | Ccr11      | -102,916,558,903,242 | Down       | 4.70E+09             | chemokine (C-C motif) receptor 1-like 1 [MGI:104617] |
| 7  | Ccl22      | -100,925,309,458,525 | Down       | 0.00190796071483424  | chemokine (C-C motif) ligand 22 [MGI:1306779]        |
| 8  | Ccr5       | 101,506,248,042,418  | Ups        | 0.00912425126402945  | chemokine (C-C motif) receptor 5 [MGI:107182]        |
| 9  | Cxcl10     | 130,353,423,350,035  | Ups        | 1.17E+04             | chemokine (C-X-C motif) ligand 10 [MGI:1352450]      |
| 10 | Cxcl11     | 134,485,427,847,557  | Ups        | 7.78E+03             | chemokine (C-X-C motif) ligand 11 [MGI:1860203]      |
| 11 | Cxcl3      | 169,873,919,381,099  | Ups        | 0.0240709820180269   | chemokine (C-X-C motif) ligand 3 [MGI:3037818]       |
| 12 | Ccl28      | 183,296,823,489,948  | Ups        | 0.00087067527861451  | chemokine (C-C motif) ligand 28 [MGI:1861731]        |
| 13 | Ccl3       | 208,633,154,195,104  | Ups        | 1.06E+07             | chemokine (C-C motif) ligand 3 [MGI:98260]           |
| 14 | Cxcl17     | 212,172,944,315,682  | Ups        | 1.97E+08             | chemokine (C-X-C motif) ligand 17 [MGI:2387642]      |
| 15 | Cxcl9      | 298,151,415,515,268  | Ups        | 2.79E-47             | chemokine (C-X-C motif) ligand 9 [MGI:1352449]       |
| 16 | Ccl8       | 357,811,639,287,199  | Ups        | 4.50E+00             | chemokine (C-C motif) ligand 8 [MGI:101878]          |
| 17 | Cd163      | 118,992,373,626,094  | Ups        | 7.29E+05             | CD163 antigen [MGI:2135946]                          |
| 18 | Cd1d2      | 189,534,233,475,896  | Ups        | 0.0341798732138818   | CD1d2 antigen [MGI:107675]                           |
| 19 | Cd200r2    | 173,987,013,393,556  | Ups        | 4.41E+06             | CD200 receptor 2 [MGI:3042847]                       |
| 20 | Cd200r4    | 164,226,301,098,143  | Ups        | 0.0123288404931076   | CD200 receptor 4 [MGI:3036289]                       |
| 21 | Cd207      | 278,228,146,955,687  | Ups        | 3.58E-18             | CD207 antigen [MGI:2180021]                          |
| 22 | Cd209a     | -115,736,055,826,259 | Down       | 0.000112962857041857 | CD209a antigen [MGI:2157942]                         |
| 23 | Cd209f     | -234,546,065,964,854 | Down       | 1.60E-06             | CD209f antigen [MGI:1916392]                         |
| 24 | Cd24a      | -206,637,804,322,302 | Down       | 2.53E+09             | CD24a antigen [MGI:88323]                            |
| 25 | Cd24a      | -206,637,804,322,302 | Down       | 0.00481493938423419  | CD24a antigen [MGI:88323]                            |
| 26 | Cd274      | 125,903,451,185,579  | Ups        | 0.0474080845076971   | CD274 antigen [MGI:1926446]                          |



| No | GeneSymbol | log2FoldChange       | Regulation | pvalue               | Description                                                                |
|----|------------|----------------------|------------|----------------------|----------------------------------------------------------------------------|
| 27 | Cd300c     | 141,814,574,091,256  | Ups        | 0.0102459369324697   | CD300C molecule [MGI:3032626]                                              |
| 28 | Cd300e     | 129,037,636,815,681  | Ups        | 1.66E-03             | CD300E molecule [MGI:2387602]                                              |
| 29 | Cd300lb    | 110,785,446,487,232  | Ups        | 0.0335544764585564   | CD300 molecule like family member B [MGI:2685099]                          |
| 30 | Cd300ld    | 146,838,087,156,572  | Ups        | 0.00269449651645808  | CD300 molecule like family member d [MGI:2442358]                          |
| 31 | Cd300ld2   | -102,916,558,903,242 | Down       | 0.000190917126226982 | CD300 molecule like family member D2 [MGI:3649405]                         |
| 32 | Cd300ld3   | -245,102,221,764,792 | Down       | 2.16E-07             | CD300 molecule like family member D3 [MGI:2687214]                         |
| 33 | Cd46       | 261,718,379,132,325  | Ups        | 1.56E+08             | CD46 antigen%2C complement regulatory protein [MGI:1203290]                |
| 34 | Cd55b      | -102,916,558,903,242 | Down       | 0.000948545222144646 | CD55 molecule%2C decay accelerating factor for complement B [MGI:104849]   |
| 35 | Cd69       | 105,306,531,517,425  | Ups        | 0.00144538210611988  | CD69 antigen [MGI:88343]                                                   |
| 36 | Cdc25b     | -194,937,025,723,248 | Down       | 1.31E+09             | cell division cycle 25B [MGI:99701]                                        |
| 37 | Ifi202b    | 154,567,207,683,445  | Ups        | 0.026993199868927    | interferon activated gene 202B [MGI:1347083]                               |
| 38 | Ifi203-ps  | 132,684,938,869,629  | Ups        | 3.72E+07             | interferon activated gene 203%2C pseudogene [MGI:3840117]                  |
| 39 | Ifi204     | 174,234,517,155,698  | Ups        | 0.00901579846684296  | interferon activated gene 204 [MGI:96429]                                  |
| 40 | Ifi205     | 113,653,847,374,474  | Ups        | 1.53E+01             | interferon activated gene 205 [MGI:101847]                                 |
| 41 | Ifi206     | 124,368,945,457,769  | Ups        | 0.049835850714925    | interferon activated gene 206 [MGI:3646410]                                |
| 42 | Ifi207     | 110,084,160,991,092  | Ups        | 0.0347682995950831   | interferon activated gene 207 [MGI:2138302]                                |
| 43 | Ifi211     | 228,570,129,943,568  | Ups        | 0.0343555049888864   | interferon activated gene 211 [MGI:3041120]                                |
| 44 | Ifi213     | 113,762,277,569,128  | Ups        | 0.00720094925434131  | interferon activated gene 213 [MGI:3695276]                                |
| 45 | Ifi2712b   | 172,226,380,355,558  | Ups        | 0.00134672923325406  | interferon%2C alpha-inducible protein 27 like 2B [MGI:1916390]             |
| 46 | Ifi44      | 123,003,622,906,065  | Ups        | 0.00579863342357507  | interferon-induced protein 44 [MGI:2443016]                                |
| 47 | Ifi44l     | -484,050,411,850,084 | Down       | 3.41E+06             | interferon-induced protein 44 like [MGI:95975]                             |
| 48 | Ifit2      | 12,612,286,259,366   | Ups        | 0.0106584206143329   | interferon-induced protein with tetratricopeptide repeats 2 [MGI:99449]    |
| 49 | Ifit3      | 162,697,947,386,414  | Ups        | 0.000257312127273739 | interferon-induced protein with tetratricopeptide repeats 3 [MGI:1101055]  |
| 50 | Ifit3      | 162,697,947,386,414  | Ups        | 7.57E+09             | interferon-induced protein with tetratricopeptide repeats 3 [MGI:1101055]  |
| 51 | Ifit3b     | 114,372,273,423,023  | Ups        | 0.000236956507679813 | interferon-induced protein with tetratricopeptide repeats 3B [MGI:3698419] |
| 52 | Ifitm5     | -242,152,647,283,567 | Down       | 0.000174473229762461 | interferon induced transmembrane protein 5 [MGI:1934923]                   |
| 53 | Ifitm7     | 127,863,067,845,322  | Ups        | 0.000180657104134611 | interferon induced transmembrane protein 7 [MGI:1921732]                   |
| 54 | Ifng       | 346,349,453,681,797  | Ups        | 0.00205732852765172  | interferon gamma [MGI:107656]                                              |
| 55 | Iglc1      | -207,555,589,316,475 | Down       | 5.38E+08             | immunoglobulin lambda constant 1 [MGI:99546]                               |
| 56 | Il11       | 245,294,076,014,196  | Ups        | 0.00168515114195359  | interleukin 11 [MGI:107613]                                                |
| 57 | Il12rb1    | 107,459,431,393,926  | Ups        | 0.0106343630983416   | interleukin 12 receptor%2C beta 1 [MGI:104579]                             |
| 58 | Il13ra2    | -115,230,703,194,707 | Down       | 3.35E+07             | interleukin 13 receptor%2C alpha 2 [MGI:1277954]                           |
| 59 | Il17c      | 246,132,411,893,887  | Ups        | 1.31E-34             | interleukin 17C [MGI:2446486]                                              |
| 60 | Il17f      | 103,989,380,545,395  | Ups        | 0.0393350272109223   | interleukin 17F [MGI:2676631]                                              |
| 61 | Il18bp     | 182,819,544,535,121  | Ups        | 0.0193064993864519   | interleukin 18 binding protein [MGI:1333800]                               |
| 62 | Il1b       | 12,103,177,756,933   | Ups        | 0.00297030828312564  | interleukin 1 beta [MGI:96543]                                             |
| 63 | Il1bos     | -102,916,558,903,242 | Down       | 0.0494950401221928   | interleukin 1 beta%2C opposite strand [MGI:3650458]                        |
| 64 | Il1rl1     | -175,102,360,589,306 | Down       | 0.0166372331393263   | interleukin 1 receptor-like 1 [MGI:98427]                                  |
| 65 | Il1rn      | 155,307,427,802,513  | Ups        | 6.72E+09             | interleukin 1 receptor antagonist [MGI:96547]                              |
| 66 | Il20rb     | -104,987,544,153,665 | Down       | 5.15E+09             | interleukin 20 receptor beta [MGI:2143266]                                 |

| No  | GeneSymbol | log2FoldChange       | Regulation | pvalue               | Description                                                                              |
|-----|------------|----------------------|------------|----------------------|------------------------------------------------------------------------------------------|
| 67  | Il21       | -180,585,568,839,724 | Down       | 1.61E-01             | interleukin 21 [MGI:1890474]                                                             |
| 68  | Il22ra1    | 117,660,927,200,449  | Ups        | 0.00458709777878779  | interleukin 22 receptor%2C alpha 1 [MGI:2663588]                                         |
| 69  | Il22ra2    | 136,722,159,334,693  | Ups        | 0.000114223794106449 | interleukin 22 receptor%2C alpha 2 [MGI:2665114]                                         |
| 70  | Il24       | -102,916,558,903,242 | Down       | 0.000492740545165748 | interleukin 24 [MGI:2135548]                                                             |
| 71  | Il31ra     | 169,873,919,381,099  | Ups        | 1.68E+03             | interleukin 31 receptor A [MGI:2180511]                                                  |
| 72  | Il36rn     | -107,151,736,343,667 | Down       | 0.00116538584440261  | interleukin 36 receptor antagonist [MGI:1859325]                                         |
| 73  | Il4        | -122,610,758,200,174 | Down       | 0.000366298038534149 | interleukin 4 [MGI:96556]                                                                |
| 74  | Il9r       | -203,511,687,385,823 | Down       | 2.41E+09             | interleukin 9 receptor [MGI:96564]                                                       |
| 75  | Irf7       | 102,038,181,523,038  | Ups        | 0.00348237516559394  | interferon regulatory factor 7 [MGI:1859212]                                             |
| 76  | Isg20      | -182,251,684,952,779 | Down       | 0.00160010702552367  | interferon-stimulated protein [MGI:1928895]                                              |
| 77  | Stmn1      | -11,484,271,190,037  | Down       | 0.000243917427893787 | stathmin 1 [MGI:96739]                                                                   |
| 78  | Tfrc       | -175,894,654,770,922 | Down       | 0.000146188260043436 | transferrin receptor [MGI:98822]                                                         |
| 79  | Tgif2-ps2  | -275,226,346,620,121 | Down       | 1.01E+04             | TGFB-induced factor homeobox 2%2C pseudogene 2 [MGI:3805950]                             |
| 80  | Tlr6       | 128,859,176,462,586  | Ups        | 7.51E+03             | toll-like receptor 6 [MGI:1341296]                                                       |
| 81  | Tlr8       | 123,215,009,396,601  | Ups        | 8.73E+04             | toll-like receptor 8 [MGI:2176887]                                                       |
| 82  | Tnfa       | 103,259,031,945,545  | Ups        | 0.0126044106243899   | tumor necrosis factor [MGI:104798]                                                       |
| 83  | Tnfrsf11a  | 110,203,941,880,374  | Ups        | 0.0056012613460807   | tumor necrosis factor receptor superfamily%2C member 11a%2C NFKB activator [MGI:1314891] |
| 84  | Tnfrsf18   | -113,450,306,048,663 | Down       | 6.24E-13             | tumor necrosis factor receptor superfamily%2C member 18 [MGI:894675]                     |
| 85  | Tnfsf11    | -226,140,185,009,885 | Down       | 0.035959516083427    | tumor necrosis factor (ligand) superfamily%2C member 11 [MGI:1100089]                    |
| 86  | Tnfsf15    | 129,789,562,497,796  | Ups        | 0.00135939643248276  | tumor necrosis factor (ligand) superfamily%2C member 15 [MGI:2180140]                    |
| 87  | Tnfsf18    | -259,266,617,951,788 | Down       | 6.77E+04             | tumor necrosis factor (ligand) superfamily%2C member 18 [MGI:2673064]                    |
| 88  | Tnfsfm13   | 153,967,727,082,311  | Ups        | 0.00140840138193554  | tumor necrosis factor (ligand) superfamily%2C membrane-bound member 13 [MGI:3845075]     |
| 89  | Tnfsf13os  | 196,705,766,442,873  | Ups        | 0.0002905955302781   | tumor necrosis factor (ligand) superfamily%2C member 13%2C opposite strand [MGI:1919587] |
| 90  | Abcb10     | -151,158,669,656,812 | Down       | 0.000197939373804585 | ATP-binding cassette%2C sub-family B (MDR/TAP)%2C member 10 [MGI:1860508]                |
| 91  | Alas2      | -255,908,950,261,728 | Down       | 4.78E+08             | aminolevulinic acid synthase 2%2C erythroid [MGI:87990]                                  |
| 92  | Asb1       | -165,676,744,053,143 | Down       | 5.14E+07             | ankyrin repeat and SOCS box-containing 1 [MGI:1929735]                                   |
| 93  | Banp       | -131,750,890,870,626 | Down       | 0.000163539227756584 | BTG3 associated nuclear protein [MGI:1889023]                                            |
| 94  | Bpgm       | -181,507,237,334,295 | Down       | 1.63E-02             | 2%2C3-bisphosphoglycerate mutase [MGI:1098242]                                           |
| 95  | Brcal      | -199,567,149,808,251 | Down       | 0.00032951834485325  | breast cancer 1%2C early onset [MGI:104537]                                              |
| 96  | Brpf3      | -148,923,393,954,232 | Down       | 1.34E+09             | bromodomain and PHD finger containing%2C 3 [MGI:2146836]                                 |
| 97  | Cdr2       | -108,936,006,968,375 | Down       | 0.00019639460475687  | cerebellar degeneration-related 2 [MGI:1100885]                                          |
| 98  | Ceacam2    | 184,383,470,257,881  | Ups        | 1.74E+07             | carcinoembryonic antigen-related cell adhesion molecule 2 [MGI:1347246]                  |
| 99  | Cfd        | 146,801,400,458,385  | Ups        | 0.000112130960120849 | complement factor D (adipsin) [MGI:87931]                                                |
| 100 | Chac2      | -100,973,559,023,206 | Down       | 0.000199635055492286 | ChaC%2C cation transport regulator 2 [MGI:1915294]                                       |
| 101 | Cit        | -123,044,873,821,842 | Down       | 0.000280086616871463 | citron [MGI:105313]                                                                      |
| 102 | Cmas       | -109,839,778,757,217 | Down       | 3.40E+08             | cytidine monophospho-N-acetylneuraminic acid synthetase [MGI:1337124]                    |
| 103 | Cmklr1     | 112,060,460,534,972  | Ups        | 0.00197449987609723  | chemokine-like receptor 1 [MGI:109603]                                                   |
| 104 | Cracd      | -188,841,277,213,941 | Down       | 2.95E+09             | capping protein inhibiting regulator of actin [MGI:2444817]                              |
| 105 | Cyp39a1    | 209,690,143,373,153  | Ups        | 3.61E+09             | cytochrome P450%2C family 39%2C subfamily a%2C polypeptide 1 [MGI:1927096]               |
| 106 | Depp1      | -153,476,805,938,576 | Down       | 1.97E+09             | DEPPI autophagy regulator [MGI:1918730]                                                  |

| No  | GeneSymbol    | log2FoldChange       | Regulation | pvalue               | Description                                                                      |
|-----|---------------|----------------------|------------|----------------------|----------------------------------------------------------------------------------|
| 107 | Dhrs11        | -165,301,872,733,256 | Down       | 7.81E+04             | dehydrogenase/reductase (SDR family) member 11 [MGI:2652816]                     |
| 108 | Diaph3        | -192,093,286,713,031 | Down       | 7.54E+09             | diaphanous related formin 3 [MGI:1927222]                                        |
| 109 | Dmtn          | -105,336,401,684,778 | Down       | 1.88E+07             | dematin actin binding protein [MGI:99670]                                        |
| 110 | Dnaja4        | -187,052,554,979,088 | Down       | 2.27E+09             | DnaJ heat shock protein family (Hsp40) member A4 [MGI:1927638]                   |
| 111 | E2f2          | -226,320,264,678,766 | Down       | 4.78E+09             | E2F transcription factor 2 [MGI:1096341]                                         |
| 112 | Ect2          | -164,729,789,835,403 | Down       | 9.62E+09             | ect2 oncogene [MGI:95281]                                                        |
| 113 | Esco2         | -216,428,235,064,309 | Down       | 9.46E+08             | establishment of sister chromatid cohesion N-acetyltransferase 2 [MGI:1919238]   |
| 114 | Ezh2          | -119,707,875,709,064 | Down       | 0.000369242291563766 | enhancer of zeste 2 polycomb repressive complex 2 subunit [MGI:107940]           |
| 115 | F930017D23Rik | -287,637,784,160,574 | Down       | 6.25E+08             | RIKEN cDNA F930017D23 gene [MGI:3822538]                                         |
| 116 | Fam214b       | -101,024,863,230,622 | Down       | 0.00020429704229819  | family with sequence similarity 214%2C member B [MGI:2441854]                    |
| 117 | Fcna          | -112,222,368,805,879 | Down       | 2.09E+07             | ficolin A [MGI:1340905]                                                          |
| 118 | Fech          | -140,101,405,927,984 | Down       | 4.92E+06             | ferrochelatase [MGI:95513]                                                       |
| 119 | Fhdc1         | -266,729,930,182,991 | Down       | 3.77E+08             | FH2 domain containing 1 [MGI:2684972]                                            |
| 120 | Fn3k          | -103,660,395,594,078 | Down       | 0.000165946323452658 | fructosamine 3 kinase [MGI:1926834]                                              |
| 121 | Gch1          | -117,227,867,360,931 | Down       | 3.75E+09             | GTP cyclohydrolase 1 [MGI:95675]                                                 |
| 122 | Gm11427       | -239,120,976,554,843 | Down       | 3.66E+09             | predicted gene 11427 [MGI:3651774]                                               |
| 123 | Gm20161       | -277,637,692,614,016 | Down       | 8.74E+09             | predicted gene%2C 20161 [MGI:5012346]                                            |
| 124 | Gm867         | -389,758,792,708,744 | Down       | 1.06E+07             | predicted gene 867 [MGI:2685713]                                                 |
| 125 | Gypc          | -16,250,739,677,354  | Down       | 0.000339433101808242 | glycophorin C [MGI:1098566]                                                      |
| 126 | H1f3          | -290,150,019,841,134 | Down       | 1.38E+08             | H1.3 linker histone%2C cluster member [MGI:107502]                               |
| 127 | H1f4          | -143,311,521,505,936 | Down       | 2.11E+09             | H1.4 linker histone%2C cluster member [MGI:1931527]                              |
| 128 | H2ac8         | -234,950,681,647,874 | Down       | 7.57E+09             | H2A clustered histone 8 [MGI:2448290]                                            |
| 129 | H2bc13        | -245,804,616,303,077 | Down       | 0.000243396307915977 | H2B clustered histone 13 [MGI:2448403]                                           |
| 130 | H4c14         | -213,050,386,183,532 | Down       | 3.02E+07             | H4 clustered histone 14 [MGI:2140113]                                            |
| 131 | H4f16         | -209,887,531,675,618 | Down       | 4.06E+06             | H4 histone 16 [MGI:2448443]                                                      |
| 132 | Hba-a1        | -267,884,178,180,584 | Down       | 1.31E+09             | hemoglobin alpha%2C adult chain 1 [MGI:96015]                                    |
| 133 | Hbb-bs        | -279,135,020,983,027 | Down       | 1.38E+09             | hemoglobin%2C beta adult s chain [MGI:5474852]                                   |
| 134 | Hbb-bt        | -321,276,121,897,613 | Down       | 8.34E+05             | hemoglobin%2C beta adult t chain [MGI:5474850]                                   |
| 135 | Hbq1b         | -30,574,579,257,002  | Down       | 1.18E+06             | hemoglobin%2C theta 1B [MGI:3613460]                                             |
| 136 | Hectd4        | -112,783,421,896,365 | Down       | 2.22E+09             | HECT domain E3 ubiquitin protein ligase 4 [MGI:3647820]                          |
| 137 | Hmbs          | -186,315,112,480,729 | Down       | 1.78E+08             | hydroxymethylbilane synthase [MGI:96112]                                         |
| 138 | Iba57         | -107,666,213,410,803 | Down       | 2.56E+09             | IBA57 homolog%2C iron-sulfur cluster assembly [MGI:3041174]                      |
| 139 | Josd2         | -174,310,313,685,955 | Down       | 1.40E+09             | Josephin domain containing 2 [MGI:1913374]                                       |
| 140 | Kifc1         | -230,598,628,942,981 | Down       | 0.000104248225750566 | kinesin family member C1 [MGI:109596]                                            |
| 141 | Klhl12        | -101,963,022,558,765 | Down       | 2.64E+09             | kelch-like 12 [MGI:2385619]                                                      |
| 142 | Marchf2       | -105,857,480,018,057 | Down       | 6.71E+05             | membrane associated ring-CH-type finger 2 [MGI:1925915]                          |
| 143 | Mcm10         | -15,050,540,986,812  | Down       | 3.41E+09             | minichromosome maintenance 10 replication initiation factor [MGI:1917274]        |
| 144 | Mdk           | -114,391,102,477,014 | Down       | 1.67E+09             | midkine [MGI:96949]                                                              |
| 145 | Mkrn1         | -134,962,160,758,435 | Down       | 1.57E+06             | makorin%2C ring finger protein%2C 1 [MGI:1859353]                                |
| 146 | Mpp2          | -15,438,218,291,112  | Down       | 0.000184377176911007 | membrane protein%2C palmitoylated 2 (MAGUK p55 subfamily member 2) [MGI:1858257] |

| No  | GeneSymbol | log2FoldChange       | Regulation | pvalue               | Description                                                                          |
|-----|------------|----------------------|------------|----------------------|--------------------------------------------------------------------------------------|
| 147 | Ms4a4c     | 151,679,701,115,015  | Ups        | 0.000271429537532449 | membrane-spanning 4-domains%2C subfamily A%2C member 4C [MGI:1927656]                |
| 148 | Mup18      | -584,767,789,803,362 | Down       | 2.20E+09             | major urinary protein 18 [MGI:3705220]                                               |
| 149 | Mup7       | -415,437,795,458,272 | Down       | 4.88E+09             | major urinary protein 7 [MGI:3709615]                                                |
| 150 | Nipa1      | -184,216,440,132,837 | Down       | 9.92E+09             | non imprinted in Prader-Willi/Angelman syndrome 1 homolog (human) [MGI:2442058]      |
| 151 | Pheta2     | -392,182,940,314,767 | Down       | 4.07E+07             | PH domain containing endocytic trafficking adaptor 2 [MGI:2443609]                   |
| 152 | Ppp1r15a   | -189,474,263,455,583 | Down       | 9.19E+09             | protein phosphatase 1%2C regulatory subunit 15A [MGI:1927072]                        |
| 153 | Prdx2      | -123,612,529,446,679 | Down       | 1.87E+09             | peroxiredoxin 2 [MGI:109486]                                                         |
| 154 | Ptp4a3     | -138,618,346,262,555 | Down       | 3.47E+05             | protein tyrosine phosphatase 4a3 [MGI:1277098]                                       |
| 155 | Rab3il1    | -163,612,577,902,575 | Down       | 2.19E+09             | RAB3A interacting protein (rabin3)-like 1 [MGI:1922010]                              |
| 156 | Rad23a     | -105,061,434,573,689 | Down       | 0.000353609488111458 | RAD23 homolog A%2C nucleotide excision repair protein [MGI:105126]                   |
| 157 | Ranbp10    | -134,235,117,272,509 | Down       | 0.000116734686085385 | RAN binding protein 10 [MGI:1921584]                                                 |
| 158 | Rbm38      | -206,052,229,077,216 | Down       | 2.84E+09             | RNA binding motif protein 38 [MGI:1889294]                                           |
| 159 | Samd11     | -416,947,987,952,591 | Down       | 2.30E+05             | sterile alpha motif domain containing 11 [MGI:2446220]                               |
| 160 | Sh3tc2     | -111,777,638,433,933 | Down       | 0.00010175420688751  | SH3 domain and tetratricopeptide repeats 2 [MGI:2444417]                             |
| 161 | Slbp       | -137,591,157,180,683 | Down       | 0.000155801861354244 | stem-loop binding protein [MGI:108402]                                               |
| 162 | Slc16a1    | -135,759,929,239,972 | Down       | 0.000187808708316891 | solute carrier family 16 (monocarboxylic acid transporters)%2C member 1 [MGI:106013] |
| 163 | Slc25a37   | -263,122,263,355,257 | Down       | 1.79E+09             | solute carrier family 25%2C member 37 [MGI:1914962]                                  |
| 164 | Slc25a38   | -137,107,539,582,326 | Down       | 0.000136581102464859 | solute carrier family 25%2C member 38 [MGI:2384782]                                  |
| 165 | Slc2a5     | 183,453,373,166,667  | Ups        | 5.57E+09             | solute carrier family 2 (facilitated glucose transporter)%2C member 5 [MGI:1928369]  |
| 166 | Slc38a5    | -235,424,341,955,901 | Down       | 4.77E+09             | solute carrier family 38%2C member 5 [MGI:2148066]                                   |
| 167 | Slc43a1    | -237,794,952,539,596 | Down       | 2.59E+07             | solute carrier family 43%2C member 1 [MGI:1931352]                                   |
| 168 | Slc4a1     | -271,251,801,095,975 | Down       | 0.000327712797160983 | solute carrier family 4 (anion exchanger)%2C member 1 [MGI:109393]                   |
| 169 | Snca       | -272,506,463,328,835 | Down       | 4.13E+05             | synuclein%2C alpha [MGI:1277151]                                                     |
| 170 | Snx15      | -118,199,937,243,131 | Down       | 0.000214603130769184 | sorting nexin 15 [MGI:1916274]                                                       |
| 171 | Sowaha     | -268,399,304,079,044 | Down       | 1.85E+07             | sosondowah ankyrin repeat domain family member A [MGI:2687280]                       |
| 172 | Specc1     | -151,184,828,876,871 | Down       | 1.99E+09             | sperm antigen with calponin homology and coiled-coil domains 1 [MGI:2442356]         |
| 173 | Spib       | -104,866,311,790,946 | Down       | 0.000374440892897851 | Spi-B transcription factor (Spi-1/PU.1 related) [MGI:892986]                         |
| 174 | Tac2       | -603,970,397,604,497 | Down       | 1.83E+09             | tachykinin 2 [MGI:98476]                                                             |
| 175 | Tent5c     | -230,846,642,651,683 | Down       | 1.92E+08             | terminal nucleotidyltransferase 5C [MGI:1921895]                                     |
| 176 | Tfdp2      | -105,901,890,592,997 | Down       | 9.99E+08             | transcription factor Dp 2 [MGI:107167]                                               |
| 177 | Tiaf2      | -235,305,234,027,899 | Down       | 0.00164157499277649  | TGF-beta1-induced anti-apoptotic factor 2 [MGI:2651383]                              |
| 178 | Tk1        | -114,131,526,037,939 | Down       | 3.10E+08             | thymidine kinase 1 [MGI:98763]                                                       |
| 179 | Tmod1      | -276,435,507,144,781 | Down       | 5.39E+08             | tropomodulin 1 [MGI:98775]                                                           |
| 180 | Tnip3      | 157,581,358,248,107  | Ups        | 2.51E+08             | TNFAIP3 interacting protein 3 [MGI:3041165]                                          |
| 181 | Tspan33    | -166,427,700,400,266 | Down       | 3.35E+08             | tetraspanin 33 [MGI:1919012]                                                         |
| 182 | Tyms       | -105,617,628,077,643 | Down       | 0.000361468660674234 | thymidylate synthase [MGI:98878]                                                     |
| 183 | Ubac1      | -177,579,501,330,778 | Down       | 4.08E+07             | ubiquitin associated domain containing 1 [MGI:1920995]                               |
| 184 | Ube2o      | -198,262,972,823,706 | Down       | 4.38E+08             | ubiquitin-conjugating enzyme E2O [MGI:2444266]                                       |
| 185 | Vopp1      | -183,845,687,267,396 | Down       | 7.85E+08             | vesicular%2C overexpressed in cancer%2C prosurvival protein 1 [MGI:2141658]          |
| 186 | Xpo7       | -143,470,132,975,091 | Down       | 8.67E+06             | exportin 7 [MGI:1929705]                                                             |

## Supplementary Table S2C

| No | GeneSymbol | log2FoldChange       | pvalue               | Regulation | Description                                                                 |
|----|------------|----------------------|----------------------|------------|-----------------------------------------------------------------------------|
| 1  | Spib       | -132,748,072,708,051 | 5.11E+05             | Down       | Spi-B transcription factor (Spi-1/PU.1 related) [MGI:892986]                |
| 2  | Dio1       | 133,710,370,397,247  | 2.68E+06             | Ups        | deiodinase%2C iodothyronine%2C type I [MGI:94896]                           |
| 3  | Ighv1-22   | -420,957,495,813,907 | 3.82E+06             | Down       | immunoglobulin heavy variable 1-22 [MGI:4439784]                            |
| 4  | Mdk        | -118,806,261,910,511 | 5.94E+06             | Down       | midkine [MGI:96949]                                                         |
| 5  | Hmgb1-ps7  | -412,141,912,021,063 | 1.91E+07             | Down       | high-mobility group high mobility group box 1%2C pseudogene 7 [MGI:3648695] |
| 6  | Mup20      | 18,868,604,389,756   | 6.64E+07             | Ups        | major urinary protein 20 [MGI:3651981]                                      |
| 7  | Fdps       | 12,372,114,797,374   | 8.21E+07             | Ups        | farnesyl diphosphate synthetase [MGI:104888]                                |
| 8  | Npy        | 602,272,959,705,064  | 3.49E+08             | Ups        | neuropeptide Y [MGI:97374]                                                  |
| 9  | Epx        | -45,156,554,518,351  | 3.66E+08             | Down       | eosinophil peroxidase [MGI:107569]                                          |
| 10 | Pou2af1    | -103,540,080,509,055 | 1.25E+09             | Down       | POU domain%2C class 2%2C associating factor 1 [MGI:105086]                  |
| 11 | Ubb-ps     | 133,181,522,544,976  | 1.95E+09             | Ups        | ubiquitin B%2C pseudogene [MGI:3037679]                                     |
| 12 | Fabp5      | 178,237,781,158,555  | 3.42E+09             | Ups        | fatty acid binding protein 5%2C epidermal [MGI:101790]                      |
| 13 | Kcnt2      | -255,960,668,721,962 | 3.75E+09             | Down       | potassium channel%2C subfamily T%2C member 2 [MGI:3036273]                  |
| 14 | Ceacam2    | 132,469,872,046,449  | 3.99E+09             | Ups        | carcinoembryonic antigen-related cell adhesion molecule 2 [MGI:1347246]     |
| 15 | Cd300ld4   | -409,992,462,243,739 | 1.85E+00             | Down       | CD300 molecule like family member D4 [MGI:3702658]                          |
| 16 | Il21       | -278,132,231,991,798 | 2.10E+09             | Down       | interleukin 21 [MGI:1890474]                                                |
| 17 | Cd209e     | -275,156,098,462,265 | 0.00335308854523479  | Down       | CD209e antigen [MGI:2157948]                                                |
| 18 | Tgif2-ps2  | -258,559,071,286,171 | 0.000300691960238157 | Down       | TGFB-induced factor homeobox 2%2C pseudogene 2 [MGI:3805950]                |
| 19 | Il13ra2    | -185,023,661,987,733 | 8.49E-29             | Down       | interleukin 13 receptor%2C alpha 2 [MGI:1277954]                            |
| 20 | Il4        | -176,771,043,178,717 | 0.00587373036912097  | Down       | interleukin 4 [MGI:96556]                                                   |
| 21 | Ccr1l1     | -167,556,359,352,467 | 4.75E+07             | Down       | chemokine (C-C motif) receptor 1-like 1 [MGI:104617]                        |
| 22 | Ccl22      | -152,192,513,662,698 | 0.000405311671056544 | Down       | chemokine (C-C motif) ligand 22 [MGI:1306779]                               |
| 23 | Ccr6       | -149,131,418,741,072 | 3.37E+04             | Down       | chemokine (C-C motif) receptor 6 [MGI:1333797]                              |
| 24 | Tnfrsf8    | -143,600,061,613,556 | 1.01E+09             | Down       | tumor necrosis factor receptor superfamily%2C member 8 [MGI:99908]          |
| 25 | Il23r      | -137,075,627,434,067 | 0.00660521731683372  | Down       | interleukin 23 receptor [MGI:2181693]                                       |
| 26 | Tnfrsf9    | -129,353,417,056,352 | 0.0107731970294349   | Down       | tumor necrosis factor receptor superfamily%2C member 9 [MGI:1101059]        |
| 27 | Tnfsf8     | -109,496,690,026,791 | 2.56E+09             | Down       | tumor necrosis factor (ligand) superfamily%2C member 8 [MGI:88328]          |
| 28 | Tnfrsf19   | -102,516,971,073,293 | 2.37E+07             | Down       | tumor necrosis factor receptor superfamily%2C member 19 [MGI:1352474]       |
| 29 | Cd209a     | -22,384,928,030,418  | 2.20E-58             | Down       | CD209a antigen [MGI:2157942]                                                |
| 30 | Ccl24      | -14,243,966,528,479  | 0.000382346343649331 | Down       | chemokine (C-C motif) ligand 24 [MGI:1928953]                               |
| 31 | Tlr2       | 101,307,952,521,908  | 1.86E+07             | Ups        | toll-like receptor 2 [MGI:1346060]                                          |
| 32 | Tnfaip2    | 102,192,162,448,255  | 0.0232894217011961   | Ups        | tumor necrosis factor%2C alpha-induced protein 2 [MGI:104960]               |
| 33 | Ifi204     | 104,632,502,092,079  | 0.0307452258855603   | Ups        | interferon activated gene 204 [MGI:96429]                                   |
| 34 | Irf7       | 104,744,836,673,836  | 2.33E+00             | Ups        | interferon regulatory factor 7 [MGI:1859212]                                |



| No | GeneSymbol | log2FoldChange      | pvalue               | Regulation | Description                                                                              |
|----|------------|---------------------|----------------------|------------|------------------------------------------------------------------------------------------|
| 35 | Ifi205     | 104,860,323,791,077 | 0.000175037308649503 | Ups        | interferon activated gene 205 [MGI:101847]                                               |
| 36 | Cd59b      | 105,788,880,034,178 | 7.10E+09             | Ups        | CD59b antigen [MGI:1888996]                                                              |
| 37 | Tlr8       | 106,872,911,519,219 | 7.26E+00             | Ups        | toll-like receptor 8 [MGI:2176887]                                                       |
| 38 | Cd209g     | 107,464,930,628,652 | 0.0269895576128606   | Ups        | CD209g antigen [MGI:1917442]                                                             |
| 39 | Cd300ld5   | 107,464,930,628,652 | 5.99E+09             | Ups        | CD300 molecule like family member D5 [MGI:3702661]                                       |
| 40 | Cxcl2      | 107,464,930,628,652 | 1.16E-38             | Ups        | chemokine (C-X-C motif) ligand 2 [MGI:1340094]                                           |
| 41 | Ifi44l     | 107,464,930,628,652 | 1.63E+02             | Ups        | interferon-induced protein 44 like [MGI:95975]                                           |
| 42 | Il1rapl1   | 107,464,930,628,652 | 2.09E+05             | Ups        | interleukin 1 receptor accessory protein-like 1 [MGI:2687319]                            |
| 43 | Il1ira2    | 107,464,930,628,652 | 0.000492740545165748 | Ups        | interleukin 11 receptor%2C alpha chain 2 [MGI:109123]                                    |
| 44 | Tnfsf4     | 107,464,930,628,652 | 0.000435017875268627 | Ups        | tumor necrosis factor (ligand) superfamily%2C member 4 [MGI:104511]                      |
| 45 | Tnfaip6    | 107,464,930,628,652 | 0.000928373184333609 | Ups        | tumor necrosis factor alpha induced protein 6 [MGI:1195266]                              |
| 46 | Il12b      | 107,665,581,283,575 | 0.00874689609902386  | Ups        | interleukin 12b [MGI:96540]                                                              |
| 47 | Ccl8       | 108,005,364,655,727 | 2.58E-03             | Ups        | chemokine (C-C motif) ligand 8 [MGI:101878]                                              |
| 48 | Tlr6       | 110,473,157,865,015 | 9.46E+09             | Ups        | toll-like receptor 6 [MGI:1341296]                                                       |
| 49 | Tnfrsf23   | 111,507,117,297,136 | 1.08E+00             | Ups        | tumor necrosis factor receptor superfamily%2C member 23 [MGI:1930269]                    |
| 50 | Tnfsf13os  | 113,219,294,110,661 | 0.0156911201266431   | Ups        | tumor necrosis factor (ligand) superfamily%2C member 13%2C opposite strand [MGI:1919587] |
| 51 | Tlr13      | 115,547,341,421,694 | 1.05E+08             | Ups        | toll-like receptor 13 [MGI:3045213]                                                      |
| 52 | Cd300e     | 116,142,686,461,352 | 0.00272713485805022  | Ups        | CD300E molecule [MGI:2387602]                                                            |
| 53 | Ifi44      | 116,621,788,027,778 | 3.52E+04             | Ups        | interferon-induced protein 44 [MGI:2443016]                                              |
| 54 | Ifit1bl1   | 118,674,903,809,899 | 2.95E+08             | Ups        | interferon induced protein with tetratricopeptide repeats 1B like 1 [MGI:3650685]        |
| 55 | Ifit2      | 118,785,956,463,145 | 8.70E+05             | Ups        | interferon-induced protein with tetratricopeptide repeats 2 [MGI:99449]                  |
| 56 | Il9r       | 119,277,456,645,938 | 3.43E+09             | Ups        | interleukin 9 receptor [MGI:96564]                                                       |
| 57 | Ifit1      | 120,926,818,238,388 | 4.45E+00             | Ups        | interferon-induced protein with tetratricopeptide repeats 1 [MGI:99450]                  |
| 58 | Il18bp     | 121,778,142,923,443 | 0.0321899239374584   | Ups        | interleukin 18 binding protein [MGI:1333800]                                             |
| 59 | Ifi211     | 122,826,655,903,682 | 7.81E+07             | Ups        | interferon activated gene 211 [MGI:3041120]                                              |
| 60 | Ifi202b    | 124,045,377,940,071 | 2.90E+04             | Ups        | interferon activated gene 202B [MGI:1347083]                                             |
| 61 | Ifi2712b   | 125,657,187,311,355 | 0.000103171301877075 | Ups        | interferon%2C alpha-inducible protein 27 like 2B [MGI:1916390]                           |
| 62 | Ifit3      | 130,305,503,452,759 | 0.0025536018126923   | Ups        | interferon-induced protein with tetratricopeptide repeats 3 [MGI:1101055]                |
| 63 | Cxcl9      | 131,528,690,326,603 | 2.36E+08             | Ups        | chemokine (C-X-C motif) ligand 9 [MGI:1352449]                                           |
| 64 | Il22ra2    | 154,359,794,387,995 | 0.0162435650732066   | Ups        | interleukin 22 receptor%2C alpha 2 [MGI:2665114]                                         |
| 65 | Il12rb2    | 175,400,760,761,824 | 1.04E-06             | Ups        | interleukin 12 receptor%2C beta 2 [MGI:1270861]                                          |
| 66 | Cd207      | 178,061,945,229,975 | 5.13E+04             | Ups        | CD207 antigen [MGI:2180021]                                                              |
| 67 | Il10       | 183,995,911,848,254 | 1.15E+03             | Ups        | interleukin 10 [MGI:96537]                                                               |
| 68 | Cxcl3      | 187,324,215,869,305 | 7.61E+01             | Ups        | chemokine (C-X-C motif) ligand 3 [MGI:3037818]                                           |
| 69 | Tnip3      | 187,434,628,829,558 | 1.65E-08             | Ups        | TNFAIP3 interacting protein 3 [MGI:3041165]                                              |
| 70 | Cd200r2    | 191,817,943,613,238 | 2.84E+06             | Ups        | Cd200 receptor 2 [MGI:3042847]                                                           |
