# Supplementary material for: Identification of immune-associated genes with altered expression in the spleen of mice enriched with probiotic Lactobacillus species using RNA-seq profiling
Source: PubMed Central journal article supplement (PMC11725755; doi:10.5713/ab.24.0280), 2024-08-26
Supplement: ab-24-0280-Supplementary-Table-3.pdf [file ab-24-0280-Supplementary-Table-3.pdf]

| No | GeneSymbol | log2FoldChange      | pvalue               | Regulation | Description                                              |
|----|------------|---------------------|----------------------|------------|----------------------------------------------------------|
| 71 | Il4i1      | 191,817,943,613,238 | 0.000237475369019883 | Ups        | interleukin 4 induced 1 [MGI:109552]                     |
| 72 | Cd14       | 202,641,041,714,651 | 9.37E+02             | Ups        | CD14 antigen [MGI:88318]                                 |
| 73 | Cd1d2      | 203,405,396,653,538 | 0.00832009748099911  | Ups        | CD1d2 antigen [MGI:107675]                               |
| 74 | Il1rn      | 209,036,679,328,658 | 5.41E+08             | Ups        | interleukin 1 receptor antagonist [MGI:96547]            |
| 75 | Il12rb1    | 214,328,629,045,949 | 1.67E+08             | Ups        | interleukin 12 receptor%2C beta 1 [MGI:104579]           |
| 76 | Cxcl17     | 230,065,376,966,381 | 1.37E+09             | Ups        | chemokine (C-X-C motif) ligand 17 [MGI:2387642]          |
| 77 | Ifnk       | 234,286,306,906,596 | 0.142881181304276    | Ups        | interferon kappa [MGI:2683287]                           |
| 78 | Ifitm7     | 240,523,715,532,405 | 0.548094718159512    | Ups        | interferon induced transmembrane protein 7 [MGI:1921732] |
| 79 | Il11       | 263,539,363,972,229 | 0.174428187317255    | Ups        | interleukin 11 [MGI:107613]                              |
| 80 | Cd163      | 307,964,851,730,233 | 0.00964409848365247  | Ups        | CD163 antigen [MGI:2135946]                              |
| 81 | Ccl28      | 326,910,508,634,092 | 0.0496813409682616   | Ups        | chemokine (C-C motif) ligand 28 [MGI:1861731]            |
| 82 | Cd200r4    | 461,113,034,685,918 | 0.240453497829044    | Ups        | CD200 receptor 4 [MGI:3036289]                           |

### Supplementary Table S3A

| No | GeneSymbol | log2FoldChange       | pvalue               | Description                                                           |
|----|------------|----------------------|----------------------|-----------------------------------------------------------------------|
| 1  | Ifi441     | -467,208,678,222,942 | 0.0250325998880863   | interferon-induced protein 44 like [MGI:95975]                        |
| 2  | Ifitm7     | -352,441,339,801,377 | 0.038499424806822    | interferon induced transmembrane protein 7 [MGI:1921732]              |
| 3  | Isg20      | -299,399,426,802,496 | 1.13E+06             | interferon-stimulated protein [MGI:1928895]                           |
| 4  | Cd24a      | -287,549,502,780,372 | 1.85E+00             | CD24a antigen [MGI:88323]                                             |
| 5  | Cd163      | -263,796,676,794,267 | 2.10E+09             | CD163 antigen [MGI:2135946]                                           |
| 6  | Ccl28      | -241,922,854,405,425 | 0.00335308854523479  | chemokine (C-C motif) ligand 28 [MGI:1861731]                         |
| 7  | Tiaf2      | -230,606,655,703,201 | 0.000300691960238157 | TGF-beta1-induced anti-apoptotic factor 2 [MGI:2651383]               |
| 8  | Ccl1       | -214,632,537,480,107 | 8.49E-29             | chemokine (C-C motif) ligand 1 [MGI:98258]                            |
| 9  | Il1rl1     | -188,637,578,938,601 | 0.00587373036912097  | interleukin 1 receptor-like 1 [MGI:98427]                             |
| 10 | Cd209f     | -187,465,718,291,774 | 4.75E+07             | CD209f antigen [MGI:1916392]                                          |
| 11 | Cd59b      | -177,786,408,180,693 | 0.000405311671056544 | CD59b antigen [MGI:1888996]                                           |
| 12 | Tnfsf11    | -124,549,286,001,411 | 3.37E+04             | tumor necrosis factor (ligand) superfamily%2C member 11 [MGI:1100089] |
| 13 | Cd1d2      | -116,963,989,627,878 | 1.01E+09             | CD1d2 antigen [MGI:107675]                                            |
| 14 | Cd200r4    | -112,781,139,803,128 | 0.00660521731683372  | CD200 receptor 4 [MGI:3036289]                                        |
| 15 | Cd209g     | -112,781,139,803,128 | 0.0107731970294349   | CD209g antigen [MGI:1917442]                                          |
| 16 | Cd300ld5   | -112,781,139,803,128 | 2.56E+09             | CD300 molecule like family member D5 [MGI:3702661]                    |
| 17 | Cxcl2      | -112,781,139,803,128 | 2.37E+07             | chemokine (C-X-C motif) ligand 2 [MGI:1340094]                        |
| 18 | Il1Ira2    | -112,781,139,803,128 | 2.20E-58             | interleukin 11 receptor%2C alpha chain 2 [MGI:109123]                 |
| 19 | Tnfsf4     | -112,781,139,803,128 | 0.000382346343649331 | tumor necrosis factor (ligand) superfamily%2C member 4 [MGI:104511]   |
| 20 | Il9r       | -111,699,687,487,171 | 1.86E+07             | interleukin 9 receptor [MGI:96564]                                    |
| 21 | Tlr5       | -110,926,096,539,279 | 0.0232894217011961   | toll-like receptor 5 [MGI:1858171]                                    |

| No | GeneSymbol | log2FoldChange       | pvalue               | Description                                                                                        |
|----|------------|----------------------|----------------------|----------------------------------------------------------------------------------------------------|
| 22 | Il17d      | -107,338,639,321,485 | 0.0307452258855603   | interleukin 17D [MGI:2446510]                                                                      |
| 23 | Ifrd2      | -105,344,449,381,285 | 2.33E+00             | interferon-related developmental regulator 2 [MGI:1316708]                                         |
| 24 | Il36rn     | -20,476,862,561,024  | 0.000175037308649503 | interleukin 36 receptor antagonist [MGI:1859325]                                                   |
| 25 | Tnfrsf14   | -12,835,308,350,574  | 7.10E+09             | tumor necrosis factor receptor superfamily%2C member 14 (herpesvirus entry mediator) [MGI:2675303] |
| 26 | Iigp1      | 11,642,690,128,155   | 7.26E+00             | interferon inducible GTPase 1 [MGI:1926259]                                                        |
| 27 | Cxcl5      | 13,450,487,601,445   | 0.0269895576128606   | chemokine (C-X-C motif) ligand 5 [MGI:1096868]                                                     |
| 28 | Ccl24      | 20,382,068,070,276   | 5.99E+09             | chemokine (C-C motif) ligand 24 [MGI:1928953]                                                      |
| 29 | Ifi204     | 106,550,898,066,082  | 1.16E-38             | interferon activated gene 204 [MGI:96429]                                                          |
| 30 | Cd8a       | 111,441,055,724,983  | 1.63E+02             | CD8 antigen%2C alpha chain [MGI:88346]                                                             |
| 31 | Tnfrsf19   | 111,907,388,148,338  | 2.09E+05             | tumor necrosis factor receptor superfamily%2C member 19 [MGI:1352474]                              |
| 32 | Cd3e       | 112,232,171,827,061  | 0.000492740545165748 | CD3 antigen%2C epsilon polypeptide [MGI:88332]                                                     |
| 33 | Ccl19      | 113,220,977,396,178  | 0.000435017875268627 | chemokine (C-C motif) ligand 19 [MGI:1346316]                                                      |
| 34 | Ifi211     | 113,686,099,434,364  | 0.000928373184333609 | interferon activated gene 211 [MGI:3041120]                                                        |
| 35 | Cd177      | 113,999,749,539,974  | 0.00874689609902386  | CD177 antigen [MGI:1916141]                                                                        |
| 36 | Cxcr6      | 115,043,957,321,004  | 2.58E-03             | chemokine (C-X-C motif) receptor 6 [MGI:1934582]                                                   |
| 37 | Ifi208     | 116,233,763,451,878  | 9.46E+09             | interferon activated gene 208 [MGI:2442822]                                                        |
| 38 | Xcl1       | 116,400,312,581,627  | 1.08E+00             | chemokine (C motif) ligand 1 [MGI:104593]                                                          |
| 39 | Ccl17      | 116,847,167,025,075  | 0.0156911201266431   | chemokine (C-C motif) ligand 17 [MGI:1329039]                                                      |
| 40 | Ccl5       | 117,613,726,547,613  | 1.05E+08             | chemokine (C-C motif) ligand 5 [MGI:98262]                                                         |
| 41 | Cd22       | 119,758,325,880,075  | 0.00272713485805022  | CD22 antigen [MGI:88322]                                                                           |
| 42 | Il18rap    | 120,258,689,091,241  | 3.52E+04             | interleukin 18 receptor accessory protein [MGI:1338888]                                            |
| 43 | Cd69       | 121,317,090,676,902  | 2.95E+08             | CD69 antigen [MGI:88343]                                                                           |
| 44 | Ticam2     | 121,678,929,611,201  | 8.70E+05             | toll-like receptor adaptor molecule 2 [MGI:3040056]                                                |
| 45 | Cxcl11     | 122,876,839,245,862  | 3.43E+09             | chemokine (C-X-C motif) ligand 11 [MGI:1860203]                                                    |
| 46 | Il1a       | 122,899,081,969,256  | 4.45E+00             | interleukin 1 alpha [MGI:96542]                                                                    |
| 47 | Ifi205     | 122,982,285,788,749  | 0.0321899239374584   | interferon activated gene 205 [MGI:101847]                                                         |
| 48 | Cxcl10     | 124,406,146,179,967  | 7.81E+07             | chemokine (C-X-C motif) ligand 10 [MGI:1352450]                                                    |
| 49 | Ccl7       | 125,177,214,306,982  | 2.90E+04             | chemokine (C-C motif) ligand 7 [MGI:99512]                                                         |
| 50 | Cd8b1      | 125,198,326,895,244  | 0.000103171301877075 | CD8 antigen%2C beta chain 1 [MGI:88347]                                                            |
| 51 | Tnfrsf4    | 126,360,264,547,992  | 0.0025536018126923   | tumor necrosis factor receptor superfamily%2C member 4 [MGI:104512]                                |
| 52 | Il18r1     | 126,642,230,201,673  | 2.36E+08             | interleukin 18 receptor 1 [MGI:105383]                                                             |
| 53 | Tgif2-ps2  | 127,345,586,880,791  | 0.0162435650732066   | TGFB-induced factor homeobox 2%2C pseudogene 2 [MGI:3805950]                                       |
| 54 | Cd300lf    | 128,952,839,438,254  | 1.04E-06             | CD300 molecule like family member F [MGI:2442359]                                                  |
| 55 | Il7        | 130,036,094,444,114  | 5.13E+04             | interleukin 7 [MGI:96561]                                                                          |
| 56 | Il36g      | 130,453,096,106,341  | 1.15E+03             | interleukin 36G [MGI:2449929]                                                                      |
| 57 | Ifi213     | 131,499,813,677,011  | 7.61E+01             | interferon activated gene 213 [MGI:3695276]                                                        |
| 58 | Ifi206     | 133,873,252,853,677  | 1.65E-08             | interferon activated gene 206 [MGI:3646410]                                                        |
| 59 | Il10       | 134,251,419,581,982  | 2.84E+06             | interleukin 10 [MGI:96537]                                                                         |
| 60 | Cd200r3    | 134,757,345,757,161  | 0.000237475369019883 | CD200 receptor 3 [MGI:1921853]                                                                     |
| 61 | Tnfrsf26   | 138,654,913,882,774  | 9.37E+02             | tumor necrosis factor receptor superfamily%2C member 26 [MGI:2651928]                              |

| No  | GeneSymbol | log2FoldChange       | pvalue               | Description                                                            |
|-----|------------|----------------------|----------------------|------------------------------------------------------------------------|
| 62  | Tnfrsf8    | 140,756,226,052,026  | 0.00832009748099911  | tumor necrosis factor receptor superfamily%2C member 8 [MGI:99908]     |
| 63  | Cd274      | 143,210,544,215,653  | 5.41E+08             | CD274 antigen [MGI:1926446]                                            |
| 64  | Tnfaip8l3  | 148,687,301,380,935  | 1.67E+08             | tumor necrosis factor%2C alpha-induced protein 8-like 3 [MGI:2685363]  |
| 65  | Ccl4       | 148,822,594,240,585  | 1.37E+09             | chemokine (C-C motif) ligand 4 [MGI:98261]                             |
| 66  | Ccr5       | 150,841,866,476,315  | 0.0189967506500919   | chemokine (C-C motif) receptor 5 [MGI:107182]                          |
| 67  | Cxcl9      | 156,939,248,347,876  | 0.00324762495805923  | chemokine (C-X-C motif) ligand 9 [MGI:1352449]                         |
| 68  | Ccr1l1     | 162,786,819,626,243  | 0.0020351074049379   | chemokine (C-C motif) receptor 1-like 1 [MGI:104617]                   |
| 69  | Cxcr1      | 162,786,819,626,243  | 7.73E-16             | chemokine (C-X-C motif) receptor 1 [MGI:2448715]                       |
| 70  | Tnfsf9     | 167,968,548,512,929  | 1.48E+02             | tumor necrosis factor (ligand) superfamily%2C member 9 [MGI:1101058]   |
| 71  | Ifnk       | 168,109,598,074,735  | 0.00391146708484     | interferon kappa [MGI:2683287]                                         |
| 72  | Tnip3      | 169,436,520,457,026  | 0.016550983947835    | TNFAIP3 interacting protein 3 [MGI:3041165]                            |
| 73  | Ccr4       | 170,789,845,406,505  | 2.89E+07             | chemokine (C-C motif) receptor 4 [MGI:107824]                          |
| 74  | Il21       | 176,485,807,999,696  | 0.00301030709618037  | interleukin 21 [MGI:1890474]                                           |
| 75  | Tnf        | 177,345,566,054,297  | 1.32E-06             | tumor necrosis factor [MGI:104798]                                     |
| 76  | Cd207      | 188,047,703,676,007  | 8.08E+05             | CD207 antigen [MGI:2180021]                                            |
| 77  | Tnfrsf9    | 201,992,426,611,829  | 1.83E-01             | tumor necrosis factor receptor superfamily%2C member 9 [MGI:1101059]   |
| 78  | Cxcl1      | 208,591,742,387,313  | 6.77E+09             | chemokine (C-X-C motif) ligand 1 [MGI:108068]                          |
| 79  | Il31ra     | 230,066,482,602,652  | 7.27E+02             | interleukin 31 receptor A [MGI:2180511]                                |
| 80  | Cd209e     | 269,341,761,322,336  | 5.60E-03             | CD209e antigen [MGI:2157948]                                           |
| 81  | Ccr10      | 273,564,247,573,611  | 0.00579863342357507  | chemokine (C-C motif) receptor 10 [MGI:1096320]                        |
| 82  | Il27       | 290,226,373,798,985  | 3.27E+08             | interleukin 27 [MGI:2384409]                                           |
| 83  | Cd300c     | 303,442,553,022,332  | 0.000193374985166703 | CD300C molecule [MGI:3032626]                                          |
| 84  | Cd3eap     | -0.00262089806457713 | 0.991332037454473    | CD3E antigen%2C epsilon polypeptide associated protein [MGI:1917583]   |
| 85  | Cd1d1      | -0.00619633600936429 | 0.976614420461485    | CD1d1 antigen [MGI:107674]                                             |
| 86  | Trap1      | -0.00846184716646613 | 0.953671786618487    | TNF receptor-associated protein 1 [MGI:1915265]                        |
| 87  | Tnfrsf12a  | -0.00925238412591791 | 0.977018660168316    | tumor necrosis factor receptor superfamily%2C member 12a [MGI:1351484] |
| 88  | Traf5      | -0.0126519064498539  | 0.965838205200276    | TNF receptor-associated factor 5 [MGI:107548]                          |
| 89  | Cxcl13     | -0.0140123739583393  | 0.949941871527495    | chemokine (C-X-C motif) ligand 13 [MGI:1888499]                        |
| 90  | Cklf       | -0.0185708272101903  | 0.971623117484487    | chemokine-like factor [MGI:1922708]                                    |
| 91  | Tab2       | -0.0253328414724077  | 0.86152115551637     | TGF-beta activated kinase 1/MAP3K7 binding protein 2 [MGI:1915902]     |
| 92  | Tlr2       | -0.0302363669344413  | 0.932851690666907    | toll-like receptor 2 [MGI:1346060]                                     |
| 93  | Il1rap     | -0.0361556684447257  | 0.831354566766087    | interleukin 1 receptor accessory protein [MGI:104975]                  |
| 94  | Cd46       | -0.0384902425299949  | 0.957985648443707    | CD46 antigen%2C complement regulatory protein [MGI:1203290]            |
| 95  | Cxcr4      | -0.0396150663657473  | 0.84656279928723     | chemokine (C-X-C motif) receptor 4 [MGI:109563]                        |
| 96  | Ifi2712a   | -0.046149681041222   | 0.831374233118246    | interferon%2C alpha-inducible protein 27 like 2A [MGI:1924183]         |
| 97  | Cd151      | -0.0578317523866776  | 0.729767623705224    | CD151 antigen [MGI:1096360]                                            |
| 98  | Cd93       | -0.0582431492956896  | 0.782845333661468    | CD93 antigen [MGI:106664]                                              |
| 99  | Il11ra1    | -0.0608153891863879  | 0.772410743680677    | interleukin 11 receptor%2C alpha chain 1 [MGI:107426]                  |
| 100 | Ifnar1     | -0.0613802660674209  | 0.759489773427156    | interferon (alpha and beta) receptor 1 [MGI:107658]                    |
| 101 | Ccl11      | -0.0621951984525066  | 0.960515525944714    | chemokine (C-C motif) ligand 11 [MGI:103576]                           |

| No  | GeneSymbol | log2FoldChange      | pvalue             | Description                                                                              |
|-----|------------|---------------------|--------------------|------------------------------------------------------------------------------------------|
| 102 | Traf7      | -0.0762018539447005 | 0.697470525564974  | TNF receptor-associated factor 7 [MGI:3042141]                                           |
| 103 | Cd300lg    | -0.0801275154884809 | 0.757465061066638  | CD300 molecule like family member G [MGI:1289168]                                        |
| 104 | Ccl3       | -0.0941071943622083 | 0.948508143810055  | chemokine (C-C motif) ligand 3 [MGI:98260]                                               |
| 105 | Cd300c2    | -0.101059902577016  | 0.74293270157257   | CD300C molecule 2 [MGI:2153249]                                                          |
| 106 | Ifnar2     | -0.102920997919415  | 0.566208679723252  | interferon (alpha and beta) receptor 2 [MGI:1098243]                                     |
| 107 | Tnfsf14    | -0.105258351757071  | 0.843708968230058  | tumor necrosis factor (ligand) superfamily%2C member 14 [MGI:1355317]                    |
| 108 | Irf7       | -0.109260756784701  | 0.778640020658634  | interferon regulatory factor 7 [MGI:1859212]                                             |
| 109 | Irf3       | -0.11073813354296   | 0.546016345404074  | interferon regulatory factor 3 [MGI:1859179]                                             |
| 110 | Ifnlr1     | -0.118381414245394  | 0.870408475771248  | interferon lambda receptor 1 [MGI:2429859]                                               |
| 111 | Traf2      | -0.133627553302836  | 0.583244219505314  | TNF receptor-associated factor 2 [MGI:101835]                                            |
| 112 | Cd63       | -0.142505918491446  | 0.475047267908515  | CD63 antigen [MGI:99529]                                                                 |
| 113 | Cd2        | -0.144492400320381  | 0.692192432964136  | CD2 antigen [MGI:88320]                                                                  |
| 114 | Cd99l2     | -0.15201955393517   | 0.409865738189925  | CD99 antigen-like 2 [MGI:2177151]                                                        |
| 115 | Irak4      | -0.156865865556092  | 0.600204967388373  | interleukin-1 receptor-associated kinase 4 [MGI:2182474]                                 |
| 116 | Ifitm5     | -0.166030718602419  | 0.967543761014425  | interferon induced transmembrane protein 5 [MGI:1934923]                                 |
| 117 | Il17b      | -0.166030718602419  | 0.967543761014425  | interleukin 17B [MGI:1928397]                                                            |
| 118 | Il2        | -0.166030718602419  | 0.967543761014425  | interleukin 2 [MGI:96548]                                                                |
| 119 | Il22ra2    | -0.166030718602419  | 0.967543761014425  | interleukin 22 receptor%2C alpha 2 [MGI:2665114]                                         |
| 120 | Ifitm10    | -0.171348496814841  | 0.798364362740487  | interferon induced transmembrane protein 10 [MGI:2444776]                                |
| 121 | Cd59a      | -0.17498586057669   | 0.424239720311483  | CD59a antigen [MGI:109177]                                                               |
| 122 | Cd63-ps    | -0.179247864588779  | 0.376320403031747  | CD63 antigen%2C pseudogene [MGI:105972]                                                  |
| 123 | Ccl12      | -0.18993698658792   | 0.920563026382899  | chemokine (C-C motif) ligand 12 [MGI:108224]                                             |
| 124 | Cd34       | -0.190627831923156  | 0.479093502184157  | CD34 antigen [MGI:88329]                                                                 |
| 125 | Cd7        | -0.1921551502642    | 0.642516172302029  | CD7 antigen [MGI:88344]                                                                  |
| 126 | Cd5l       | -0.196401576458325  | 0.380876783756348  | CD5 antigen-like [MGI:1334419]                                                           |
| 127 | Cd81       | -0.19812577997359   | 0.249178183376981  | CD81 antigen [MGI:1096398]                                                               |
| 128 | Tnfrsf11a  | -0.217550868134337  | 0.59945360055784   | tumor necrosis factor receptor superfamily%2C member 11a%2C NFKB activator [MGI:1314891] |
| 129 | Tnfrsf23   | -0.236071494728239  | 0.760046811426956  | tumor necrosis factor receptor superfamily%2C member 23 [MGI:1930269]                    |
| 130 | Traf4      | -0.27905371563932   | 0.14319395567051   | TNF receptor associated factor 4 [MGI:1202880]                                           |
| 131 | Ccr3       | -0.281656739915279  | 0.347426081474393  | chemokine (C-C motif) receptor 3 [MGI:104616]                                            |
| 132 | Cd82       | -0.288872163234644  | 0.0439961508075757 | CD82 antigen [MGI:104651]                                                                |
| 133 | Irak1      | -0.305869436114942  | 0.0363014153504541 | interleukin-1 receptor-associated kinase 1 [MGI:107420]                                  |
| 134 | Ifit1      | -0.312286661382303  | 0.425747770855162  | interferon-induced protein with tetratricopeptide repeats 1 [MGI:99450]                  |
| 135 | Tradd      | -0.32084418319158   | 0.278902182416941  | TNFRSF1A-associated via death domain [MGI:109200]                                        |
| 136 | Cd109      | -0.358104629938749  | 0.745508358824141  | CD109 antigen [MGI:2445221]                                                              |
| 137 | Il12rb2    | -0.383878764950175  | 0.746929799831355  | interleukin 12 receptor%2C beta 2 [MGI:1270861]                                          |
| 138 | Irf6       | -0.428169906557162  | 0.108744610527716  | interferon regulatory factor 6 [MGI:1859211]                                             |
| 139 | Il23r      | -0.440425466724552  | 0.831086014133864  | interleukin 23 receptor [MGI:2181693]                                                    |
| 140 | Ifi27      | -0.447231251319332  | 0.041460446116183  | interferon%2C alpha-inducible protein 27 [MGI:1277180]                                   |
| 141 | Cd320      | -0.459428918086463  | 0.0636900255722184 | CD320 antigen [MGI:1860083]                                                              |

| No  | GeneSymbol | log2FoldChange      | pvalue               | Description                                                                              |
|-----|------------|---------------------|----------------------|------------------------------------------------------------------------------------------|
| 142 | Cd47       | -0.491028547007987  | 0.00531923417079533  | CD47 antigen (Rh-related antigen%2C integrin-associated signal transducer) [MGI:96617]   |
| 143 | Il12b      | -0.492416373035835  | 0.824904907360906    | interleukin 12b [MGI:96540]                                                              |
| 144 | Tnfrsf22   | -0.495120144135035  | 0.523536279657579    | tumor necrosis factor receptor superfamily%2C member 22 [MGI:1930270]                    |
| 145 | Tab1       | -0.521103362069085  | 0.077328950388393    | TGF-beta activated kinase 1/MAP3K7 binding protein 1 [MGI:1913763]                       |
| 146 | Tnfsf15    | -0.521400568599564  | 0.339253828524011    | tumor necrosis factor (ligand) superfamily%2C member 15 [MGI:2180140]                    |
| 147 | Il5ra      | -0.551261011170715  | 0.393641958983789    | interleukin 5 receptor%2C alpha [MGI:96558]                                              |
| 148 | Ccr9       | -0.567195082782     | 0.419583623003574    | chemokine (C-C motif) receptor 9 [MGI:1341902]                                           |
| 149 | Tnfrsf17   | -0.619169651463248  | 0.727280101298829    | tumor necrosis factor receptor superfamily%2C member 17 [MGI:1343050]                    |
| 150 | Cd36       | -0.633591974469062  | 0.00491284423549008  | CD36 molecule [MGI:107899]                                                               |
| 151 | Ccr12      | -0.682958015456919  | 0.0723671883780414   | chemokine (C-C motif) receptor-like 2 [MGI:1920904]                                      |
| 152 | Cd276      | -0.69303052016331   | 0.164651744179628    | CD276 antigen [MGI:2183926]                                                              |
| 153 | Il34       | -0.729289410143117  | 0.0772264665344376   | interleukin 34 [MGI:1923777]                                                             |
| 154 | Cxcl14     | -0.731018774539997  | 0.0367566196281666   | chemokine (C-X-C motif) ligand 14 [MGI:1888514]                                          |
| 155 | Cd101      | -0.751461888912382  | 0.580966647610969    | CD101 antigen [MGI:2685862]                                                              |
| 156 | Tab3       | -0.751892440678     | 0.000658642078124466 | TGF-beta activated kinase 1/MAP3K7 binding protein 3 [MGI:1913974]                       |
| 157 | Cd164l2    | -0.789286342584549  | 0.290331722899568    | CD164 sialomucin-like 2 [MGI:1916905]                                                    |
| 158 | Tnfaip2    | -0.813354828952169  | 2.56E+09             | tumor necrosis factor%2C alpha-induced protein 2 [MGI:104960]                            |
| 159 | Ccr8       | -0.836351016506273  | 0.827928642888937    | chemokine (C-C motif) receptor 8 [MGI:1201402]                                           |
| 160 | Tnfaip8l1  | -0.851482091279983  | 0.024296157655913    | tumor necrosis factor%2C alpha-induced protein 8-like 1 [MGI:1913693]                    |
| 161 | Ccl27a     | -0.899256964009961  | 0.179736175590395    | chemokine (C-C motif) ligand 27A [MGI:1343459]                                           |
| 162 | Irf9       | 0.00578129580675873 | 0.971158860904259    | interferon regulatory factor 9 [MGI:107587]                                              |
| 163 | Tgif1      | 0.0078571917397229  | 0.976290648676561    | TGFB-induced factor homeobox 1 [MGI:1194497]                                             |
| 164 | Il12a      | 0.00800953944136572 | 0.993310395019588    | interleukin 12a [MGI:96539]                                                              |
| 165 | Ifrd1      | 0.0100593475575256  | 0.97283682725776     | interferon-related developmental regulator 1 [MGI:1316717]                               |
| 166 | Tlr12      | 0.0199029546257431  | 0.968797101890282    | toll-like receptor 12 [MGI:3045221]                                                      |
| 167 | Il17ra     | 0.0217756898963605  | 0.913141631770644    | interleukin 17 receptor A [MGI:107399]                                                   |
| 168 | Tlr6       | 0.0328116779623929  | 0.973225885879667    | toll-like receptor 6 [MGI:1341296]                                                       |
| 169 | Il18       | 0.0357724627932457  | 0.897020380319818    | interleukin 18 [MGI:107936]                                                              |
| 170 | Cd2bp2     | 0.0458398108531906  | 0.819039788597307    | CD2 cytoplasmic tail binding protein 2 [MGI:1917483]                                     |
| 171 | Tnfaip8    | 0.0483327950074373  | 0.774699246540361    | tumor necrosis factor%2C alpha-induced protein 8 [MGI:2147191]                           |
| 172 | Tnfsf13os  | 0.0516247136939314  | 0.980314827981839    | tumor necrosis factor (ligand) superfamily%2C member 13%2C opposite strand [MGI:1919587] |
| 173 | Cd68       | 0.0539403258353834  | 0.798912083013518    | CD68 antigen [MGI:88342]                                                                 |
| 174 | Tlr8       | 0.0541136621182674  | 0.926818415965238    | toll-like receptor 8 [MGI:2176887]                                                       |
| 175 | Irak2      | 0.0566807490615935  | 0.790486764154397    | interleukin-1 receptor-associated kinase 2 [MGI:2429603]                                 |
| 176 | Tnfrsf25   | 0.0581771357945654  | 0.948853502808462    | tumor necrosis factor receptor superfamily%2C member 25 [MGI:1934667]                    |
| 177 | Irak1bp1   | 0.0632242855281988  | 0.886066641861696    | interleukin-1 receptor-associated kinase 1 binding protein 1 [MGI:1929475]               |
| 178 | Il17rc     | 0.0713916328161358  | 0.826940559242956    | interleukin 17 receptor C [MGI:2159336]                                                  |
| 179 | Cd55       | 0.0973200597254049  | 0.741833131168513    | CD55 molecule%2C decay accelerating factor for complement [MGI:104850]                   |
| 180 | Cd300ld4   | 0.102312397026384   | 0.939944294541932    | CD300 molecule like family member D4 [MGI:3702658]                                       |
| 181 | Il1b       | 0.11666501999121    | 0.849589182486489    | interleukin 1 beta [MGI:96543]                                                           |

| No  | GeneSymbol | log2FoldChange    | pvalue             | Description                                                                             |
|-----|------------|-------------------|--------------------|-----------------------------------------------------------------------------------------|
| 182 | Tnfaip1    | 0.120519793083749 | 0.484878709400778  | tumor necrosis factor%2C alpha-induced protein 1 (endothelial) [MGI:104961]             |
| 183 | Cd55os     | 0.122420591753774 | 0.913292075452116  | CD55 molecule%2C opposite strand sequence [MGI:3783116]                                 |
| 184 | Ilf2       | 0.131721339231805 | 0.532707105175246  | interleukin enhancer binding factor 2 [MGI:1915031]                                     |
| 185 | Il3ra      | 0.135094984150729 | 0.802368952392734  | interleukin 3 receptor%2C alpha chain [MGI:96553]                                       |
| 186 | Cd164      | 0.135274463324251 | 0.374850489058394  | CD164 antigen [MGI:1859568]                                                             |
| 187 | Tnfsfm13   | 0.1362115869742   | 0.810843380875184  | tumor necrosis factor (ligand) superfamily%2C membrane-bound member 13 [MGI:3845075]    |
| 188 | Il20rb     | 0.139736995709714 | 0.952099196144495  | interleukin 20 receptor beta [MGI:2143266]                                              |
| 189 | Ifngr2     | 0.140328400504836 | 0.490671531071914  | interferon gamma receptor 2 [MGI:107654]                                                |
| 190 | Il15       | 0.147052804314778 | 0.707063790410625  | interleukin 15 [MGI:103014]                                                             |
| 191 | Tnfrsf10b  | 0.148759127381646 | 0.837409721499781  | tumor necrosis factor receptor superfamily%2C member 10b [MGI:1341090]                  |
| 192 | Ticam1     | 0.149015628252634 | 0.541499683238755  | toll-like receptor adaptor molecule 1 [MGI:2147032]                                     |
| 193 | Il33       | 0.155686805402557 | 0.656889333014612  | interleukin 33 [MGI:1924375]                                                            |
| 194 | Ifit1bl1   | 0.157399841767243 | 0.70495420187187   | interferon induced protein with tetratricopeptide repeats 1B like 1 [MGI:3650685]       |
| 195 | Irf2bp2    | 0.163207052582951 | 0.255816463023966  | interferon regulatory factor 2 binding protein 2 [MGI:2443921]                          |
| 196 | Ccl9       | 0.169833557908595 | 0.418930776655877  | chemokine (C-C motif) ligand 9 [MGI:104533]                                             |
| 197 | Ifi30      | 0.171346654587207 | 0.253951212296436  | interferon gamma inducible protein 30 [MGI:2137648]                                     |
| 198 | Irf2bp1    | 0.171969081381717 | 0.417878973681996  | interferon regulatory factor 2 binding protein 1 [MGI:2442159]                          |
| 199 | Ccl25      | 0.173940025582159 | 0.704575226931074  | chemokine (C-C motif) ligand 25 [MGI:1099448]                                           |
| 200 | Il15ra     | 0.185353859360625 | 0.504805871708158  | interleukin 15 receptor%2C alpha chain [MGI:104644]                                     |
| 201 | Ifih1      | 0.198847034938949 | 0.325883747171355  | interferon induced with helicase C domain 1 [MGI:1918836]                               |
| 202 | Tnfrsf11b  | 0.204560390222012 | 0.715772080153654  | tumor necrosis factor receptor superfamily%2C member 11b (osteoprotegerin) [MGI:109587] |
| 203 | Cxcl16     | 0.211120547627169 | 0.322489962102074  | chemokine (C-X-C motif) ligand 16 [MGI:1932682]                                         |
| 204 | Ccl22      | 0.219307400097519 | 0.752750090130745  | chemokine (C-C motif) ligand 22 [MGI:1306779]                                           |
| 205 | Il17f      | 0.222187994632948 | 0.906629352628846  | interleukin 17F [MGI:2676631]                                                           |
| 206 | Il17re     | 0.225903465632429 | 0.669837852411572  | interleukin 17 receptor E [MGI:1889371]                                                 |
| 207 | Cx3cr1     | 0.234927905142528 | 0.583789260154121  | chemokine (C-X3-C motif) receptor 1 [MGI:1333815]                                       |
| 208 | Traf3      | 0.237195416990574 | 0.407806211016947  | TNF receptor-associated factor 3 [MGI:108041]                                           |
| 209 | Il17rd     | 0.240605717898909 | 0.584651823494223  | interleukin 17 receptor D [MGI:2159727]                                                 |
| 210 | Cx3cl1     | 0.241846044798438 | 0.320439256069755  | chemokine (C-X3-C motif) ligand 1 [MGI:1097153]                                         |
| 211 | Ccl19-ps3  | 0.246422764009725 | 0.92129214115864   | chemokine (C-C motif) ligand 19%2C pseudogene 3 [MGI:1891391]                           |
| 212 | Ifit1bl2   | 0.258141488667347 | 0.679195045825905  | interferon induced protein with tetratricopeptide repeats 1B like 2 [MGI:2148249]       |
| 213 | Tnfrsf21   | 0.269802829311968 | 0.188868662745486  | tumor necrosis factor receptor superfamily%2C member 21 [MGI:2151075]                   |
| 214 | Cd248      | 0.276255287972712 | 0.46788532869847   | CD248 antigen%2C endosialin [MGI:1917695]                                               |
| 215 | Il10rb     | 0.277632200316675 | 0.185765188633765  | interleukin 10 receptor%2C beta [MGI:109380]                                            |
| 216 | Cd44       | 0.278436637529509 | 0.0816991261541565 | CD44 antigen [MGI:88338]                                                                |
| 217 | Il4ra      | 0.278673910210636 | 0.226695040687524  | interleukin 4 receptor%2C alpha [MGI:105367]                                            |
| 218 | Ifitm2     | 0.28155299351991  | 0.0518562182742356 | interferon induced transmembrane protein 2 [MGI:1933382]                                |
| 219 | Ifitm3     | 0.284052306820555 | 0.151495144257277  | interferon induced transmembrane protein 3 [MGI:1913391]                                |
| 220 | Ifitm1     | 0.285869071018815 | 0.183058310401998  | interferon induced transmembrane protein 1 [MGI:1915963]                                |
| 221 | Cd52       | 0.286126719788438 | 0.123721781445766  | CD52 antigen [MGI:1346088]                                                              |

| No  | GeneSymbol | log2FoldChange    | pvalue              | Description                                                               |
|-----|------------|-------------------|---------------------|---------------------------------------------------------------------------|
| 222 | Il13ra1    | 0.287625727742269 | 0.113086776264654   | interleukin 13 receptor%2C alpha 1 [MGI:105052]                           |
| 223 | Ilf3       | 0.289842650277837 | 0.137526102020061   | interleukin enhancer binding factor 3 [MGI:1339973]                       |
| 224 | Il7r       | 0.295885538234105 | 0.443324935078424   | interleukin 7 receptor [MGI:96562]                                        |
| 225 | Ccr7       | 0.298539109973693 | 0.427001910970691   | chemokine (C-C motif) receptor 7 [MGI:103011]                             |
| 226 | Cd200      | 0.300050777218861 | 0.183788615413839   | CD200 antigen [MGI:1196990]                                               |
| 227 | Cd2ap      | 0.302564648150759 | 0.0629944511950471  | CD2-associated protein [MGI:1330281]                                      |
| 228 | Cd84       | 0.30261684604872  | 0.235854335728596   | CD84 antigen [MGI:1336885]                                                |
| 229 | Tnip1      | 0.303100464479111 | 0.100260577411036   | TNFAIP3 interacting protein 1 [MGI:1926194]                               |
| 230 | Il27ra     | 0.303254191499219 | 0.41640259561368    | interleukin 27 receptor%2C alpha [MGI:1355318]                            |
| 231 | Il10ra     | 0.306110691680129 | 0.262934810380336   | interleukin 10 receptor%2C alpha [MGI:96538]                              |
| 232 | Ccl8       | 0.308417593486029 | 0.832893591234898   | chemokine (C-C motif) ligand 8 [MGI:101878]                               |
| 233 | Cd9        | 0.30956038962614  | 0.0732039987392036  | CD9 antigen [MGI:88348]                                                   |
| 234 | Ifit2      | 0.312363410961508 | 0.581592890060422   | interferon-induced protein with tetratricopeptide repeats 2 [MGI:99449]   |
| 235 | Tlr11      | 0.318154398174146 | 0.598777278201427   | toll-like receptor 11 [MGI:3045226]                                       |
| 236 | Ifngr1     | 0.325760726511796 | 0.0954568966714441  | interferon gamma receptor 1 [MGI:107655]                                  |
| 237 | Irf2bpl    | 0.329905132240616 | 0.0600060633626642  | interferon regulatory factor 2 binding protein-like [MGI:2442463]         |
| 238 | Cd96       | 0.335206298844372 | 0.524470126909059   | CD96 antigen [MGI:1934368]                                                |
| 239 | Cd40lg     | 0.338460331425115 | 0.686015409202497   | CD40 ligand [MGI:88337]                                                   |
| 240 | Il6st      | 0.350926435789585 | 0.0123179059689625  | interleukin 6 signal transducer [MGI:96560]                               |
| 241 | Irf2       | 0.353297853088101 | 0.0475117080556533  | interferon regulatory factor 2 [MGI:96591]                                |
| 242 | Cd200r1    | 0.360866267081491 | 0.604257244948017   | CD200 receptor 1 [MGI:1889024]                                            |
| 243 | Il4        | 0.361012280532992 | 0.707998880866982   | interleukin 4 [MGI:96556]                                                 |
| 244 | Tnip2      | 0.361786268541343 | 0.374758596010122   | TNFAIP3 interacting protein 2 [MGI:2386643]                               |
| 245 | Isg20l2    | 0.362339612067662 | 0.135197469947919   | interferon stimulated exonuclease gene 20-like 2 [MGI:2140076]            |
| 246 | Il1rn      | 0.362816603090356 | 0.447144462670158   | interleukin 1 receptor antagonist [MGI:96547]                             |
| 247 | Cd300lb    | 0.370484261708807 | 0.545677463736596   | CD300 molecule like family member B [MGI:2685099]                         |
| 248 | Ifi35      | 0.382212563689015 | 0.125112041034184   | interferon-induced protein 35 [MGI:1917360]                               |
| 249 | Cd37       | 0.390350955481076 | 0.0735484983212959  | CD37 antigen [MGI:88330]                                                  |
| 250 | Il12rb1    | 0.391975061330469 | 0.673185903519082   | interleukin 12 receptor%2C beta 1 [MGI:104579]                            |
| 251 | Cd302      | 0.399478961570796 | 0.00525976115575836 | CD302 antigen [MGI:1913455]                                               |
| 252 | Traf6      | 0.400177540021195 | 0.0465748235446407  | TNF receptor-associated factor 6 [MGI:108072]                             |
| 253 | Ifit3      | 0.400498849422531 | 0.579809997848773   | interferon-induced protein with tetratricopeptide repeats 3 [MGI:1101055] |
| 254 | Ifi214     | 0.404757580933885 | 0.388448663685583   | interferon activated gene 214 [MGI:3584522]                               |
| 255 | Cd79b      | 0.406345554211332 | 0.0526700847937988  | CD79B antigen [MGI:96431]                                                 |
| 256 | Cd209b     | 0.406967284214564 | 0.516167423629291   | CD209b antigen [MGI:1916415]                                              |
| 257 | Traf1      | 0.408575039005231 | 0.286749210913634   | TNF receptor-associated factor 1 [MGI:101836]                             |
| 258 | Irf4       | 0.412691189353366 | 0.274935864689247   | interferon regulatory factor 4 [MGI:1096873]                              |
| 259 | Tlr7       | 0.416701084665449 | 0.14659783562647    | toll-like receptor 7 [MGI:2176882]                                        |
| 260 | Tnfaip8l2  | 0.418117826063772 | 0.238942464908366   | tumor necrosis factor%2C alpha-induced protein 8-like 2 [MGI:1917019]     |
| 261 | Cd160      | 0.438008339817651 | 0.589499747759476   | CD160 antigen [MGI:1860383]                                               |

| No  | GeneSymbol | log2FoldChange    | pvalue               | Description                                                                                                         |
|-----|------------|-------------------|----------------------|---------------------------------------------------------------------------------------------------------------------|
| 262 | Cd83       | 0.439323778072355 | 0.115022591202222    | CD83 antigen [MGI:1328316]                                                                                          |
| 263 | Cd180      | 0.446213810611807 | 0.0767026097841315   | CD180 antigen [MGI:1194924]                                                                                         |
| 264 | Cd27       | 0.447062877049395 | 0.390775453333307    | CD27 antigen [MGI:88326]                                                                                            |
| 265 | Cd80       | 0.451130141529966 | 0.552967109660943    | CD80 antigen [MGI:101775]                                                                                           |
| 266 | Il22ra1    | 0.452030462980702 | 0.49215470451408     | interleukin 22 receptor%2C alpha 1 [MGI:2663588]                                                                    |
| 267 | Ifi2712b   | 0.457902377052753 | 0.345945470886309    | interferon%2C alpha-inducible protein 27 like 2B [MGI:1916390]                                                      |
| 268 | Tlr13      | 0.458943881899901 | 0.140577303803213    | toll-like receptor 13 [MGI:3045213]                                                                                 |
| 269 | Il2ra      | 0.470293492891564 | 0.368411860707167    | interleukin 2 receptor%2C alpha chain [MGI:96549]                                                                   |
| 270 | Tnfsf12    | 0.470519992178027 | 0.182643593257936    | tumor necrosis factor (ligand) superfamily%2C member 12 [MGI:1196259]                                               |
| 271 | Cd28       | 0.481779316549017 | 0.235195443118841    | CD28 antigen [MGI:88327]                                                                                            |
| 272 | Il21r      | 0.481866976603221 | 0.109919325989967    | interleukin 21 receptor [MGI:1890475]                                                                               |
| 273 | Cd300a     | 0.485017580724152 | 0.0676574688060003   | CD300A molecule [MGI:2443411]                                                                                       |
| 274 | Il1r12     | 0.487670618077008 | 0.627775880128114    | interleukin 1 receptor-like 2 [MGI:1913107]                                                                         |
| 275 | Ifi202b    | 0.493439585157298 | 0.128408240461472    | interferon activated gene 202B [MGI:1347083]                                                                        |
| 276 | Ccr6       | 0.500387193255969 | 0.593849218922839    | chemokine (C-C motif) receptor 6 [MGI:1333797]                                                                      |
| 277 | Cd19       | 0.503283160719574 | 0.0534139607651807   | CD19 antigen [MGI:88319]                                                                                            |
| 278 | Tnfrsf1a   | 0.505749176745495 | 0.00299045911604082  | tumor necrosis factor receptor superfamily%2C member 1a [MGI:1314884]                                               |
| 279 | Cd53       | 0.515837379640613 | 0.0117913875661492   | CD53 antigen [MGI:88341]                                                                                            |
| 280 | Tlr4       | 0.521961684360146 | 0.170971295513889    | toll-like receptor 4 [MGI:96824]                                                                                    |
| 281 | Cd79a      | 0.522728497899787 | 0.265114290335539    | CD79A antigen (immunoglobulin-associated alpha) [MGI:101774]                                                        |
| 282 | Cxc112     | 0.525992759736716 | 0.000259552574958741 | chemokine (C-X-C motif) ligand 12 [MGI:103556]                                                                      |
| 283 | Il13ra2    | 0.533817072380013 | 0.550174457658057    | interleukin 13 receptor%2C alpha 2 [MGI:1277954]                                                                    |
| 284 | Ifi44      | 0.533846290140054 | 0.0316870595370626   | interferon-induced protein 44 [MGI:2443016]                                                                         |
| 285 | Cd72       | 0.534006558076675 | 0.1526178443517      | CD72 antigen [MGI:88345]                                                                                            |
| 286 | Cd48       | 0.535767015101577 | 0.0230293099051064   | CD48 antigen [MGI:88339]                                                                                            |
| 287 | Irf8       | 0.536853164584016 | 0.00148361989343686  | interferon regulatory factor 8 [MGI:96395]                                                                          |
| 288 | Il2rg      | 0.538253141746562 | 0.051792348201692    | interleukin 2 receptor%2C gamma chain [MGI:96551]                                                                   |
| 289 | Cd209d     | 0.546107262084666 | 0.636995577542673    | CD209d antigen [MGI:2157947]                                                                                        |
| 290 | Cd226      | 0.546392951973788 | 0.121403527765362    | CD226 antigen [MGI:3039602]                                                                                         |
| 291 | Cd247      | 0.558469431605847 | 0.23918555678342     | CD247 antigen [MGI:88334]                                                                                           |
| 292 | Cd74       | 0.571936825164035 | 0.0100249349757588   | CD74 antigen (invariant polypeptide of major histocompatibility complex%2C class II antigen-associated) [MGI:96534] |
| 293 | Ifi203     | 0.582764082925234 | 0.011066263737456    | interferon activated gene 203 [MGI:96428]                                                                           |
| 294 | Ccl21a     | 0.584366981579454 | 0.0319029605365772   | chemokine (C-C motif) ligand 21A (serine) [MGI:1349183]                                                             |
| 295 | Tlr1       | 0.593702163030924 | 0.143056785778838    | toll-like receptor 1 [MGI:1341295]                                                                                  |
| 296 | Cd38       | 0.595644041864618 | 0.00674699389742657  | CD38 antigen [MGI:107474]                                                                                           |
| 297 | Cd86       | 0.603683034557796 | 0.0469762594738896   | CD86 antigen [MGI:101773]                                                                                           |
| 298 | Tnfrsf1b   | 0.606611616981598 | 0.00290956546035809  | tumor necrosis factor receptor superfamily%2C member 1b [MGI:1314883]                                               |
| 299 | Cd3g       | 0.609923477508849 | 0.114846942572303    | CD3 antigen%2C gamma polypeptide [MGI:88333]                                                                        |
| 300 | Il17rb     | 0.624549092427731 | 0.0822593937165307   | interleukin 17 receptor B [MGI:1355292]                                                                             |
| 301 | Cd300ld    | 0.62651751199306  | 0.147014437119913    | CD300 molecule like family member d [MGI:2442358]                                                                   |



| No  | GeneSymbol | log2FoldChange    | pvalue               | Description                                                                |
|-----|------------|-------------------|----------------------|----------------------------------------------------------------------------|
| 302 | Il6ra      | 0.62745662204919  | 0.000681174675524113 | interleukin 6 receptor%2C alpha [MGI:105304]                               |
| 303 | Tnfsf13    | 0.629420644028745 | 0.533743569652573    | tumor necrosis factor (ligand) superfamily%2C member 13 [MGI:1916833]      |
| 304 | Cxcr3      | 0.63099611437337  | 0.169258570948703    | chemokine (C-X-C motif) receptor 3 [MGI:1277207]                           |
| 305 | Cd6        | 0.639549874329568 | 0.0991506099179415   | CD6 antigen [MGI:103566]                                                   |
| 306 | Xcr1       | 0.640570076664002 | 0.106016960264015    | chemokine (C motif) receptor 1 [MGI:1346338]                               |
| 307 | Cd3d       | 0.646919833301991 | 0.115736458574076    | CD3 antigen%2C delta polypeptide [MGI:88331]                               |
| 308 | Il17c      | 0.667259996841466 | 0.861592352302551    | interleukin 17C [MGI:2446486]                                              |
| 309 | Irf5       | 0.672033355003061 | 0.00604460221835361  | interferon regulatory factor 5 [MGI:1350924]                               |
| 310 | Ifitm6     | 0.68188010042084  | 0.338875107910184    | interferon induced transmembrane protein 6 [MGI:2686976]                   |
| 311 | Tnfrsf13c  | 0.69783769658362  | 0.0218976757977497   | tumor necrosis factor receptor superfamily%2C member 13c [MGI:1919299]     |
| 312 | Cd209a     | 0.698893250065596 | 0.306370897173838    | CD209a antigen [MGI:2157942]                                               |
| 313 | Tnfsf13b   | 0.700879325634683 | 0.223013742006234    | tumor necrosis factor (ligand) superfamily%2C member 13b [MGI:1344376]     |
| 314 | Tnfrsf18   | 0.704469468118433 | 0.238390413277454    | tumor necrosis factor receptor superfamily%2C member 18 [MGI:894675]       |
| 315 | Ccl2       | 0.714287694168747 | 0.463025475282119    | chemokine (C-C motif) ligand 2 [MGI:98259]                                 |
| 316 | Cd14       | 0.714771319953072 | 0.0353409118752642   | CD14 antigen [MGI:88318]                                                   |
| 317 | Tlr9       | 0.721228649560435 | 0.0242121459409123   | toll-like receptor 9 [MGI:1932389]                                         |
| 318 | Il16       | 0.722850602827847 | 0.00309414116077347  | interleukin 16 [MGI:1270855]                                               |
| 319 | Cxcr2      | 0.752092240879032 | 0.448199005495829    | chemokine (C-X-C motif) receptor 2 [MGI:105303]                            |
| 320 | Ifi203-ps  | 0.770292226826671 | 0.315213973645857    | interferon activated gene 203%2C pseudogene [MGI:3840117]                  |
| 321 | Tnfsf10    | 0.771286278672198 | 0.181020826326392    | tumor necrosis factor (ligand) superfamily%2C member 10 [MGI:107414]       |
| 322 | Ccr1       | 0.77470738561189  | 0.160248083844902    | chemokine (C-C motif) receptor 1 [MGI:104618]                              |
| 323 | Tlr3       | 0.778277151960211 | 0.0215435095885121   | toll-like receptor 3 [MGI:2156367]                                         |
| 324 | Igtp       | 0.789314396976879 | 0.356495740840447    | interferon gamma induced GTPase [MGI:107729]                               |
| 325 | Ifit3b     | 0.791296652637032 | 0.0095310273031995   | interferon-induced protein with tetratricopeptide repeats 3B [MGI:3698419] |
| 326 | Cxcr5      | 0.792983360322817 | 0.0140572225560079   | chemokine (C-X-C motif) receptor 5 [MGI:103567]                            |
| 327 | Cxcl17     | 0.795741953611212 | 0.845383403523719    | chemokine (C-X-C motif) ligand 17 [MGI:2387642]                            |
| 328 | Il13       | 0.795741953611212 | 0.845383403523719    | interleukin 13 [MGI:96541]                                                 |
| 329 | Il5        | 0.795741953611212 | 0.845383403523719    | interleukin 5 [MGI:96557]                                                  |
| 330 | Cd300ld3   | 0.795741953611213 | 0.845383403523719    | CD300 molecule like family member D3 [MGI:2687214]                         |
| 331 | Il11       | 0.795741953611213 | 0.845383403523719    | interleukin 11 [MGI:107613]                                                |
| 332 | Il6        | 0.795741953611213 | 0.845383403523719    | interleukin 6 [MGI:96559]                                                  |
| 333 | Cd5        | 0.796461147491995 | 0.0497530530681747   | CD5 antigen [MGI:88340]                                                    |
| 334 | Cd40       | 0.797237518225806 | 0.107811063032872    | CD40 antigen [MGI:88336]                                                   |
| 335 | Tnfaip3    | 0.799652030105652 | 0.0115563469347853   | tumor necrosis factor%2C alpha-induced protein 3 [MGI:1196377]             |
| 336 | Ifi47      | 0.821606644253156 | 0.229445027029568    | interferon gamma inducible protein 47 [MGI:99448]                          |
| 337 | Irak3      | 0.823742973890325 | 0.0733313535720141   | interleukin-1 receptor-associated kinase 3 [MGI:1921164]                   |
| 338 | Il2rb      | 0.828317095444588 | 0.000132595912680144 | interleukin 2 receptor%2C beta chain [MGI:96550]                           |
| 339 | Ccl6       | 0.830449781595352 | 0.0044527744697818   | chemokine (C-C motif) ligand 6 [MGI:98263]                                 |
| 340 | Tnfsf8     | 0.833698958856261 | 0.249549146314776    | tumor necrosis factor (ligand) superfamily%2C member 8 [MGI:88328]         |
| 341 | Ifng       | 0.838094825889796 | 0.574783831600906    | interferon gamma [MGI:107656]                                              |

| No  | GeneSymbol | log2FoldChange    | pvalue               | Description                                                              |
|-----|------------|-------------------|----------------------|--------------------------------------------------------------------------|
| 342 | Cd33       | 0.876413322247743 | 0.0354573023568116   | CD33 antigen [MGI:99440]                                                 |
| 343 | Ifi207     | 0.878535350614814 | 0.00544209624302547  | interferon activated gene 207 [MGI:2138302]                              |
| 344 | Cd4        | 0.946038620355342 | 0.000271557003981623 | CD4 antigen [MGI:88335]                                                  |
| 345 | Il18bp     | 0.956570843727043 | 0.0498410686680807   | interleukin 18 binding protein [MGI:1333800]                             |
| 346 | Irf1       | 0.965993590376363 | 0.0750485214668104   | interferon regulatory factor 1 [MGI:96590]                               |
| 347 | Il1r1      | 0.96669390579034  | 0.00101148013019242  | interleukin 1 receptor%2C type I [MGI:96545]                             |
| 348 | Tnfrsf13b  | 0.968066000458808 | 0.0035258051754074   | tumor necrosis factor receptor superfamily%2C member 13b [MGI:1889411]   |
| 349 | Ifi209     | 0.972959177442438 | 0.0757701294025109   | interferon activated gene 209 [MGI:2138243]                              |
| 350 | Cd300e     | 0.976789250331802 | 0.046327934140017    | CD300E molecule [MGI:2387602]                                            |
| 351 | Cd244a     | 0.980513867948435 | 0.137159882877012    | CD244 molecule A [MGI:109294]                                            |
| 352 | Ccr2       | 0.99280427409108  | 0.000109489595297875 | chemokine (C-C motif) receptor 2 [MGI:106185]                            |
| 353 | Il1r2      | 0.993179435749462 | 0.243372833738953    | interleukin 1 receptor%2C type II [MGI:96546]                            |
| 354 | Cd200r2    | NA                | NA                   | Cd200 receptor 2 [MGI:3042847]                                           |
| 355 | Cd209c     | NA                | NA                   | CD209c antigen [MGI:2157945]                                             |
| 356 | Cd300ld2   | NA                | NA                   | CD300 molecule like family member D2 [MGI:3649405]                       |
| 357 | Cd55b      | NA                | NA                   | CD55 molecule%2C decay accelerating factor for complement B [MGI:104849] |
| 358 | Cd70       | NA                | NA                   | CD70 antigen [MGI:1195273]                                               |
| 359 | Cd9-ps     | NA                | NA                   | Cd9 antigen%2C pseudogene [MGI:3645134]                                  |
| 360 | Ccl19-ps1  | NA                | NA                   | chemokine (C-C motif) ligand 19%2C pseudogene 1 [MGI:1891387]            |
| 361 | Ccl20      | NA                | NA                   | chemokine (C-C motif) ligand 20 [MGI:1329031]                            |
| 362 | Ccl21b     | NA                | NA                   | chemokine (C-C motif) ligand 21B (leucine) [MGI:1349182]                 |
| 363 | Ccl21d     | NA                | NA                   | chemokine (C-C motif) ligand 21D [MGI:5434896]                           |
| 364 | Ccl26      | NA                | NA                   | chemokine (C-C motif) ligand 26 [MGI:3589281]                            |
| 365 | Ccl27b     | NA                | NA                   | chemokine (C-C motif) ligand 27b [MGI:1891389]                           |
| 366 | Cxcl15     | NA                | NA                   | chemokine (C-X-C motif) ligand 15 [MGI:1339941]                          |
| 367 | Cxcl3      | NA                | NA                   | chemokine (C-X-C motif) ligand 3 [MGI:3037818]                           |
| 368 | Ifna1      | NA                | NA                   | interferon alpha 1 [MGI:107668]                                          |
| 369 | Ifna11     | NA                | NA                   | interferon alpha 11 [MGI:109210]                                         |
| 370 | Ifna12     | NA                | NA                   | interferon alpha 12 [MGI:2676324]                                        |
| 371 | Ifna13     | NA                | NA                   | interferon alpha 13 [MGI:2667155]                                        |
| 372 | Ifna14     | NA                | NA                   | interferon alpha 14 [MGI:3641425]                                        |
| 373 | Ifna15     | NA                | NA                   | interferon alpha 15 [MGI:3649418]                                        |
| 374 | Ifna16     | NA                | NA                   | interferon alpha 16 [MGI:3649260]                                        |
| 375 | Ifna2      | NA                | NA                   | interferon alpha 2 [MGI:107666]                                          |
| 376 | Ifna4      | NA                | NA                   | interferon alpha 4 [MGI:107664]                                          |
| 377 | Ifna5      | NA                | NA                   | interferon alpha 5 [MGI:107663]                                          |
| 378 | Ifna6      | NA                | NA                   | interferon alpha 6 [MGI:107662]                                          |
| 379 | Ifna7      | NA                | NA                   | interferon alpha 7 [MGI:107661]                                          |
| 380 | Ifna9      | NA                | NA                   | interferon alpha 9 [MGI:107659]                                          |
| 381 | Ifnab      | NA                | NA                   | interferon alpha B [MGI:1097683]                                         |

| No  | GeneSymbol | log2FoldChange | pvalue | Description                                                           |
|-----|------------|----------------|--------|-----------------------------------------------------------------------|
| 382 | Ifna-ps1   | NA             | NA     | interferon alpha gene%2C pseudogene 1 [MGI:107669]                    |
| 383 | Ifnb1      | NA             | NA     | interferon beta 1%2C fibroblast [MGI:107657]                          |
| 384 | Ifne       | NA             | NA     | interferon epsilon [MGI:2667156]                                      |
| 385 | Ifnl2      | NA             | NA     | interferon lambda 2 [MGI:3647279]                                     |
| 386 | Ifnl3      | NA             | NA     | interferon lambda 3 [MGI:2450574]                                     |
| 387 | Ifnz       | NA             | NA     | interferon zeta [MGI:2448469]                                         |
| 388 | Il1bos     | NA             | NA     | interleukin 1 beta%2C opposite strand [MGI:3650458]                   |
| 389 | Il1f10     | NA             | NA     | interleukin 1 family%2C member 10 [MGI:2652548]                       |
| 390 | Il1rap1l   | NA             | NA     | interleukin 1 receptor accessory protein-like 1 [MGI:2687319]         |
| 391 | Il1rap12   | NA             | NA     | interleukin 1 receptor accessory protein-like 2 [MGI:1913106]         |
| 392 | Il17a      | NA             | NA     | interleukin 17A [MGI:107364]                                          |
| 393 | Il19       | NA             | NA     | interleukin 19 [MGI:1890472]                                          |
| 394 | Il20       | NA             | NA     | interleukin 20 [MGI:1890473]                                          |
| 395 | Il20ra     | NA             | NA     | interleukin 20 receptor%2C alpha [MGI:3605069]                        |
| 396 | Il22       | NA             | NA     | interleukin 22 [MGI:1355307]                                          |
| 397 | Il22b      | NA             | NA     | interleukin 22B [MGI:2151139]                                         |
| 398 | Il23a      | NA             | NA     | interleukin 23%2C alpha subunit p19 [MGI:1932410]                     |
| 399 | Il24       | NA             | NA     | interleukin 24 [MGI:2135548]                                          |
| 400 | Il25       | NA             | NA     | interleukin 25 [MGI:2155888]                                          |
| 401 | Il3        | NA             | NA     | interleukin 3 [MGI:96552]                                             |
| 402 | Il31       | NA             | NA     | interleukin 31 [MGI:1923649]                                          |
| 403 | Il36a      | NA             | NA     | interleukin 36A [MGI:1859324]                                         |
| 404 | Il36b      | NA             | NA     | interleukin 36B [MGI:1916927]                                         |
| 405 | Il4i1      | NA             | NA     | interleukin 4 induced 1 [MGI:109552]                                  |
| 406 | Il9        | NA             | NA     | interleukin 9 [MGI:96563]                                             |
| 407 | Tnfsf18    | NA             | NA     | tumor necrosis factor (ligand) superfamily%2C member 18 [MGI:2673064] |
| 408 | Tnfaip6    | NA             | NA     | tumor necrosis factor alpha induced protein 6 [MGI:1195266]           |
| 409 | Tgif1-ps   | NA             | NA     | TGFB-induced factor homeobox 1%2C pseudogene [MGI:3779880]            |
| 410 | Tgif2      | NA             | NA     | TGFB-induced factor homeobox 2 [MGI:1915299]                          |
| 411 | Tgif2lx1   | NA             | NA     | TGFB-induced factor homeobox 2-like%2C X-linked 1 [MGI:2387796]       |
| 412 | Tgif2lx2   | NA             | NA     | TGFB-induced factor homeobox 2-like%2C X-linked 2 [MGI:3800824]       |
| 413 | Tgif2-ps1  | NA             | NA     | TGFB-induced factor homeobox 2%2C pseudogene 1 [MGI:3649223]          |

### Supplementary Table S3B

| No | GeneSymbol | log2FoldChange       | pvalue   | Description                                    |
|----|------------|----------------------|----------|------------------------------------------------|
| 1  | Ifi44l     | -484.050,411.850,084 | 3.41E+06 | interferon-induced protein 44 like [MGI:95975] |

| No | GeneSymbol | log2FoldChange       | pvalue               | Description                                                                              |
|----|------------|----------------------|----------------------|------------------------------------------------------------------------------------------|
| 2  | Tgif2-ps2  | -275,226,346,620,121 | 1.01E+04             | TGFB-induced factor homeobox 2%2C pseudogene 2 [MGI:3805950]                             |
| 3  | Tnfsf18    | -259,266,617,951,788 | 6.77E+04             | tumor necrosis factor (ligand) superfamily%2C member 18 [MGI:2673064]                    |
| 4  | Ccr8       | -249,257,209,704,091 | 0.00541197569589675  | chemokine (C-C motif) receptor 8 [MGI:1201402]                                           |
| 5  | Cd300ld3   | -245,102,221,764,792 | 2.16E-07             | CD300 molecule like family member D3 [MGI:2687214]                                       |
| 6  | Ifitm5     | -242,152,647,283,567 | 0.000174473229762461 | interferon induced transmembrane protein 5 [MGI:1934923]                                 |
| 7  | Tiaf2      | -235,305,234,027,899 | 0.00164157499277649  | TGF-beta1-induced anti-apoptotic factor 2 [MGI:2651383]                                  |
| 8  | Cd209f     | -234,546,065,964,854 | 1.60E-06             | CD209f antigen [MGI:1916392]                                                             |
| 9  | Tnfsf11    | -226,140,185,009,885 | 0.035959516083427    | tumor necrosis factor (ligand) superfamily%2C member 11 [MGI:1100089]                    |
| 10 | Ccl1       | -224,763,623,519,066 | 0.0161466172851243   | chemokine (C-C motif) ligand 1 [MGI:98258]                                               |
| 11 | Cd24a      | -206,637,804,322,302 | 0.00481493938423419  | CD24a antigen [MGI:88323]                                                                |
| 12 | Il9r       | -203,511,687,385,823 | 2.41E+09             | interleukin 9 receptor [MGI:96564]                                                       |
| 13 | Isg20      | -182,251,684,952,779 | 0.00160010702552367  | interferon-stimulated protein [MGI:1928895]                                              |
| 14 | Il21       | -180,585,568,839,724 | 1.61E-01             | interleukin 21 [MGI:1890474]                                                             |
| 15 | Il1rl1     | -175,102,360,589,306 | 0.0166372331393263   | interleukin 1 receptor-like 1 [MGI:98427]                                                |
| 16 | Ccl7       | -166,827,998,525,313 | 1.03E+08             | chemokine (C-C motif) ligand 7 [MGI:99512]                                               |
| 17 | Il4        | -122,610,758,200,174 | 0.000366298038534149 | interleukin 4 [MGI:96556]                                                                |
| 18 | Cd209a     | -115,736,055,826,259 | 0.000112962857041857 | CD209a antigen [MGI:2157942]                                                             |
| 19 | Il13ra2    | -115,230,703,194,707 | 3.35E+07             | interleukin 13 receptor%2C alpha 2 [MGI:1277954]                                         |
| 20 | Tnfrsf18   | -113,450,306,048,663 | 6.24E-13             | tumor necrosis factor receptor superfamily%2C member 18 [MGI:894675]                     |
| 21 | Cxcl5      | -112,385,380,828,418 | 0.0361351883780983   | chemokine (C-X-C motif) ligand 5 [MGI:1096868]                                           |
| 22 | Il36rn     | -107,151,736,343,667 | 0.00116538584440261  | interleukin 36 receptor antagonist [MGI:1859325]                                         |
| 23 | Il20rb     | -104,987,544,153,665 | 5.15E+09             | interleukin 20 receptor beta [MGI:2143266]                                               |
| 24 | Cd300ld2   | -102,916,558,903,242 | 0.000190917126226982 | CD300 molecule like family member D2 [MGI:3649405]                                       |
| 25 | Cd55b      | -102,916,558,903,242 | 0.000948545222144646 | CD55 molecule%2C decay accelerating factor for complement B [MGI:104849]                 |
| 26 | Ccr1ll     | -102,916,558,903,242 | 4.70E+09             | chemokine (C-C motif) receptor 1-like 1 [MGI:104617]                                     |
| 27 | Il1bos     | -102,916,558,903,242 | 0.0494950401221928   | interleukin 1 beta%2C opposite strand [MGI:3650458]                                      |
| 28 | Il24       | -102,916,558,903,242 | 0.000492740545165748 | interleukin 24 [MGI:2135548]                                                             |
| 29 | Ccl22      | -100,925,309,458,525 | 0.00190796071483424  | chemokine (C-C motif) ligand 22 [MGI:1306779]                                            |
| 30 | Il1b       | 12,103,177,756,933   | 0.00297030828312564  | interleukin 1 beta [MGI:96543]                                                           |
| 31 | Ifit2      | 12,612,286,259,366   | 0.0106584206143329   | interferon-induced protein with tetratricopeptide repeats 2 [MGI:99449]                  |
| 32 | Ccr5       | 101,506,248,042,418  | 0.00912425126402945  | chemokine (C-C motif) receptor 5 [MGI:107182]                                            |
| 33 | Irf7       | 102,038,181,523,038  | 0.00348237516559394  | interferon regulatory factor 7 [MGI:1859212]                                             |
| 34 | Tnf        | 103,259,031,945,545  | 0.0126044106243899   | tumor necrosis factor [MGI:104798]                                                       |
| 35 | Il17f      | 103,989,380,545,395  | 0.0393350272109223   | interleukin 17F [MGI:2676631]                                                            |
| 36 | Cd69       | 105,306,531,517,425  | 0.00144538210611988  | CD69 antigen [MGI:88343]                                                                 |
| 37 | Il12rb1    | 107,459,431,393,926  | 0.0106343630983416   | interleukin 12 receptor%2C beta 1 [MGI:104579]                                           |
| 38 | Ifi207     | 110,084,160,991,092  | 0.0347682995950831   | interferon activated gene 207 [MGI:2138302]                                              |
| 39 | Tnfrsf11a  | 110,203,941,880,374  | 0.0056012613460807   | tumor necrosis factor receptor superfamily%2C member 11a%2C NFKB activator [MGI:1314891] |
| 40 | Cd300lb    | 110,785,446,487,232  | 0.0335544764585564   | CD300 molecule like family member B [MGI:2685099]                                        |
| 41 | Cmklr1     | 112,060,460,534,972  | 0.00197449987609723  | chemokine-like receptor 1 [MGI:109603]                                                   |

| No | GeneSymbol | log2FoldChange      | pvalue               | Description                                                                              |
|----|------------|---------------------|----------------------|------------------------------------------------------------------------------------------|
| 42 | Ifi205     | 113,653,847,374,474 | 1.53E+01             | interferon activated gene 205 [MGI:101847]                                               |
| 43 | Ifi213     | 113,762,277,569,128 | 0.00720094925434131  | interferon activated gene 213 [MGI:3695276]                                              |
| 44 | Ifit3b     | 114,372,273,423,023 | 0.000236956507679813 | interferon-induced protein with tetratricopeptide repeats 3B [MGI:3698419]               |
| 45 | Il22ra1    | 117,660,927,200,449 | 0.00458709777878779  | interleukin 22 receptor%2C alpha 1 [MGI:2663588]                                         |
| 46 | Cd163      | 118,992,373,626,094 | 7.29E+05             | CD163 antigen [MGI:2135946]                                                              |
| 47 | Ifi44      | 123,003,622,906,065 | 0.00579863342357507  | interferon-induced protein 44 [MGI:2443016]                                              |
| 48 | Tlr8       | 123,215,009,396,601 | 8.73E+04             | toll-like receptor 8 [MGI:2176887]                                                       |
| 49 | Ifi206     | 124,368,945,457,769 | 0.049835850714925    | interferon activated gene 206 [MGI:3646410]                                              |
| 50 | Cd274      | 125,903,451,185,579 | 0.0474080845076971   | CD274 antigen [MGI:1926446]                                                              |
| 51 | Ifitm7     | 127,863,067,845,322 | 0.000180657104134611 | interferon induced transmembrane protein 7 [MGI:1921732]                                 |
| 52 | Tlr6       | 128,859,176,462,586 | 7.51E+03             | toll-like receptor 6 [MGI:1341296]                                                       |
| 53 | Cd300e     | 129,037,636,815,681 | 1.66E-03             | CD300E molecule [MGI:2387602]                                                            |
| 54 | Tnfsf15    | 129,789,562,497,796 | 0.00135939643248276  | tumor necrosis factor (ligand) superfamily%2C member 15 [MGI:2180140]                    |
| 55 | Cxcl10     | 130,353,423,350,035 | 1.17E+04             | chemokine (C-X-C motif) ligand 10 [MGI:1352450]                                          |
| 56 | Ifi203-ps  | 132,684,938,869,629 | 3.72E+07             | interferon activated gene 203%2C pseudogene [MGI:3840117]                                |
| 57 | Cxcl11     | 134,485,427,847,557 | 7.78E+03             | chemokine (C-X-C motif) ligand 11 [MGI:1860203]                                          |
| 58 | Il22ra2    | 136,722,159,334,693 | 0.000114223794106449 | interleukin 22 receptor%2C alpha 2 [MGI:2665114]                                         |
| 59 | Cd300c     | 141,814,574,091,256 | 0.0102459369324697   | CD300C molecule [MGI:3032626]                                                            |
| 60 | Cd300ld    | 146,838,087,156,572 | 0.00269449651645808  | CD300 molecule like family member d [MGI:2442358]                                        |
| 61 | Tnfsfm13   | 153,967,727,082,311 | 0.00140840138193554  | tumor necrosis factor (ligand) superfamily%2C membrane-bound member 13 [MGI:3845075]     |
| 62 | Ifi202b    | 154,567,207,683,445 | 0.0269931999868927   | interferon activated gene 202B [MGI:1347083]                                             |
| 63 | Il1rn      | 155,307,427,802,513 | 6.72E+09             | interleukin 1 receptor antagonist [MGI:96547]                                            |
| 64 | Tnip3      | 157,581,358,248,107 | 2.51E+08             | TNFAIP3 interacting protein 3 [MGI:3041165]                                              |
| 65 | Ifit3      | 162,697,947,386,414 | 7.57E+09             | interferon-induced protein with tetratricopeptide repeats 3 [MGI:1101055]                |
| 66 | Cd200r4    | 164,226,301,098,143 | 0.0123288404931076   | CD200 receptor 4 [MGI:3036289]                                                           |
| 67 | Cxcl3      | 169,873,919,381,099 | 0.0240709820180269   | chemokine (C-X-C motif) ligand 3 [MGI:3037818]                                           |
| 68 | Il31ra     | 169,873,919,381,099 | 1.68E+03             | interleukin 31 receptor A [MGI:2180511]                                                  |
| 69 | Ifi2712b   | 172,226,380,355,558 | 0.00134672923325406  | interferon%2C alpha-inducible protein 27 like 2B [MGI:1916390]                           |
| 70 | Cd200r2    | 173,987,013,393,556 | 4.41E+06             | CD200 receptor 2 [MGI:3042847]                                                           |
| 71 | Ifi204     | 174,234,517,155,698 | 0.00901579846684296  | interferon activated gene 204 [MGI:96429]                                                |
| 72 | Il18bp     | 182,819,544,535,121 | 0.0193064993864519   | interleukin 18 binding protein [MGI:1333800]                                             |
| 73 | Ccl28      | 183,296,823,489,948 | 0.00087067527861451  | chemokine (C-C motif) ligand 28 [MGI:1861731]                                            |
| 74 | Cd1d2      | 189,534,233,475,896 | 0.0341798732138818   | CD1d2 antigen [MGI:107675]                                                               |
| 75 | Tnfsf13os  | 196,705,766,442,873 | 0.0002905955302781   | tumor necrosis factor (ligand) superfamily%2C member 13%2C opposite strand [MGI:1919587] |
| 76 | Ccl3       | 208,633,154,195,104 | 1.06E+07             | chemokine (C-C motif) ligand 3 [MGI:98260]                                               |
| 77 | Cxcl17     | 212,172,944,315,682 | 1.97E+08             | chemokine (C-X-C motif) ligand 17 [MGI:2387642]                                          |
| 78 | Ifi211     | 228,570,129,943,568 | 0.0343555049888864   | interferon activated gene 211 [MGI:3041120]                                              |
| 79 | Il11       | 245,294,076,014,196 | 0.00168515114195359  | interleukin 11 [MGI:107613]                                                              |
| 80 | Il17c      | 246,132,411,893,887 | 1.31E-34             | interleukin 17C [MGI:2446486]                                                            |
| 81 | Cd46       | 261,718,379,132,325 | 1.56E+08             | CD46 antigen%2C complement regulatory protein [MGI:1203290]                              |

| No  | GeneSymbol | log2FoldChange       | pvalue              | Description                                                                            |
|-----|------------|----------------------|---------------------|----------------------------------------------------------------------------------------|
| 82  | Cd207      | 278,228,146,955,687  | 3.58E-18            | CD207 antigen [MGI:2180021]                                                            |
| 83  | Cxcl9      | 298,151,415,515,268  | 2.79E-47            | chemokine (C-X-C motif) ligand 9 [MGI:1352449]                                         |
| 84  | Ifng       | 346,349,453,681,797  | 0.00205732852765172 | interferon gamma [MGI:107656]                                                          |
| 85  | Ccl8       | 357,811,639,287,199  | 4.50E+00            | chemokine (C-C motif) ligand 8 [MGI:101878]                                            |
| 86  | Cd33       | -0.00206894340042602 | 4.85E+02            | CD33 antigen [MGI:99440]                                                               |
| 87  | Ticam1     | -0.00776199401549808 | 0.976860736957682   | toll-like receptor adaptor molecule 1 [MGI:2147032]                                    |
| 88  | Cd226      | -0.00793817960121456 | 0.986391712184033   | CD226 antigen [MGI:3039602]                                                            |
| 89  | Ccl6       | -0.0134644221181461  | 0.98000118980861    | chemokine (C-C motif) ligand 6 [MGI:98263]                                             |
| 90  | Cd2bp2     | -0.0209667208931064  | 0.922260756813839   | CD2 cytoplasmic tail binding protein 2 [MGI:1917483]                                   |
| 91  | Il18rap    | -0.0476326272446964  | 0.928613766304406   | interleukin 18 receptor accessory protein [MGI:1338888]                                |
| 92  | Cd28       | -0.0501520252648333  | 0.912648158680412   | CD28 antigen [MGI:88327]                                                               |
| 93  | Cxcl14     | -0.0582544223196329  | 0.902284860536707   | chemokine (C-X-C motif) ligand 14 [MGI:1888514]                                        |
| 94  | Cd53       | -0.0596368816991226  | 0.896089327456709   | CD53 antigen [MGI:88341]                                                               |
| 95  | Il7r       | -0.0596989949411239  | 0.900733494062685   | interleukin 7 receptor [MGI:96562]                                                     |
| 96  | Cxcl2      | -0.0673813451958187  | 0.98397949829283    | chemokine (C-X-C motif) ligand 2 [MGI:1340094]                                         |
| 97  | Tnfaip6    | -0.0673813451958187  | 0.98397949829283    | tumor necrosis factor alpha induced protein 6 [MGI:1195266]                            |
| 98  | Cd93       | -0.0725845789445186  | 0.81124398309121    | CD93 antigen [MGI:106664]                                                              |
| 99  | Tgfb1      | -0.0797241220552671  | 0.83181015106553    | TGF-beta-induced factor homeobox 1 [MGI:1194497]                                       |
| 100 | Cd40       | -0.0905646844356355  | 0.842882117596452   | CD40 antigen [MGI:88336]                                                               |
| 101 | Cd3d       | -0.0914454353228171  | 0.826250765857615   | CD3 antigen%2C delta polypeptide [MGI:88331]                                           |
| 102 | Ifngr2     | -0.0957451234525125  | 0.75022482368458    | interferon gamma receptor 2 [MGI:107654]                                               |
| 103 | Cxcr2      | -0.0959007774680071  | 0.930643779034199   | chemokine (C-X-C motif) receptor 2 [MGI:105303]                                        |
| 104 | Cd47       | -0.0975187144232861  | 0.770490727885801   | CD47 antigen (Rh-related antigen%2C integrin-associated signal transducer) [MGI:96617] |
| 105 | Tab2       | -0.105086053718113   | 0.654586871313516   | TGF-beta activated kinase 1/MAP3K7 binding protein 2 [MGI:1915902]                     |
| 106 | Cd81       | -0.111403596285922   | 0.688358787240081   | CD81 antigen [MGI:1096398]                                                             |
| 107 | Il17d      | -0.122028447133116   | 0.925272084903702   | interleukin 17D [MGI:2446510]                                                          |
| 108 | Cd83       | -0.131729279690585   | 0.741152742072415   | CD83 antigen [MGI:1328316]                                                             |
| 109 | Il6st      | -0.135878270719172   | 0.577731314903669   | interleukin 6 signal transducer [MGI:96560]                                            |
| 110 | Il2ra      | -0.1370753559063     | 0.810607574845762   | interleukin 2 receptor%2C alpha chain [MGI:96549]                                      |
| 111 | Irf3       | -0.138248485304541   | 0.503894243874256   | interferon regulatory factor 3 [MGI:1859179]                                           |
| 112 | Ifngr1     | -0.144552757218623   | 0.669204827144374   | interferon gamma receptor 1 [MGI:107655]                                               |
| 113 | Il17ra     | -0.147371475841095   | 0.608479472928764   | interleukin 17 receptor A [MGI:107399]                                                 |
| 114 | Cd82       | -0.151750644386617   | 0.558385430726052   | CD82 antigen [MGI:104651]                                                              |
| 115 | Tradd      | -0.153653573518962   | 0.648021234531297   | TNFRSF1A-associated via death domain [MGI:109200]                                      |
| 116 | Cd3eap     | -0.166334689903377   | 0.68311708465339    | CD3E antigen%2C epsilon polypeptide associated protein [MGI:1917583]                   |
| 117 | Irf2bp2    | -0.167307514840589   | 0.592628780573562   | interferon regulatory factor 2 binding protein 2 [MGI:2443921]                         |
| 118 | Cd3g       | -0.177530196021157   | 0.726062277838288   | CD3 antigen%2C gamma polypeptide [MGI:88333]                                           |
| 119 | Il33       | -0.199012392586926   | 0.581505622160395   | interleukin 33 [MGI:1924375]                                                           |
| 120 | Ifnar1     | -0.213043569833111   | 0.384604184793477   | interferon (alpha and beta) receptor 1 [MGI:107658]                                    |
| 121 | Irak1bp1   | -0.213534310299973   | 0.714765821455163   | interleukin-1 receptor-associated kinase 1 binding protein 1 [MGI:1929475]             |

| No  | GeneSymbol | log2FoldChange     | pvalue             | Description                                                                       |
|-----|------------|--------------------|--------------------|-----------------------------------------------------------------------------------|
| 122 | Tnfrsf13b  | -0.216987627030838 | 0.645870255206168  | tumor necrosis factor receptor superfamily%2C member 13b [MGI:1889411]            |
| 123 | Traf3      | -0.216991837960707 | 0.486040267012135  | TNF receptor-associated factor 3 [MGI:108041]                                     |
| 124 | Cd55       | -0.225588512763036 | 0.475021408683729  | CD55 molecule%2C decay accelerating factor for complement [MGI:104850]            |
| 125 | Traf1      | -0.226173856801173 | 0.574448905576599  | TNF receptor-associated factor 1 [MGI:101836]                                     |
| 126 | Cd27       | -0.226350120890811 | 0.638350564159356  | CD27 antigen [MGI:88326]                                                          |
| 127 | Cd37       | -0.240365773746762 | 0.28951599087779   | CD37 antigen [MGI:88330]                                                          |
| 128 | Il1r1      | -0.25035114885921  | 0.591269441850057  | interleukin 1 receptor%2C type I [MGI:96545]                                      |
| 129 | Ccl5       | -0.25326940542412  | 0.621116008319578  | chemokine (C-C motif) ligand 5 [MGI:98262]                                        |
| 130 | Cxcr3      | -0.267634869885066 | 0.626589026674859  | chemokine (C-X-C motif) receptor 3 [MGI:1277207]                                  |
| 131 | Irf2bp1    | -0.268662500678373 | 0.331080110285017  | interferon regulatory factor 2 binding protein 1 [MGI:2442159]                    |
| 132 | Tnfrsf17   | -0.273239831043352 | 0.842982877278942  | tumor necrosis factor receptor superfamily%2C member 17 [MGI:1343050]             |
| 133 | Il16       | -0.273379007342896 | 0.38485346253948   | interleukin 16 [MGI:1270855]                                                      |
| 134 | Cd34       | -0.274904490663729 | 0.354378480948817  | CD34 antigen [MGI:88329]                                                          |
| 135 | Irf2bpl    | -0.280811398278624 | 0.16862494138705   | interferon regulatory factor 2 binding protein-like [MGI:2442463]                 |
| 136 | Tnfsf8     | -0.284109358348299 | 0.744625779291833  | tumor necrosis factor (ligand) superfamily%2C member 8 [MGI:88328]                |
| 137 | Tab1       | -0.286082297640091 | 0.359004701665704  | TGF-beta activated kinase 1/MAP3K7 binding protein 1 [MGI:1913763]                |
| 138 | Ifrd1      | -0.288729875581826 | 0.31761880139314   | interferon-related developmental regulator 1 [MGI:1316717]                        |
| 139 | Il2rb      | -0.294170710276941 | 0.441821170195249  | interleukin 2 receptor%2C beta chain [MGI:96550]                                  |
| 140 | Ccr7       | -0.300189031845553 | 0.491621334891789  | chemokine (C-C motif) receptor 7 [MGI:103011]                                     |
| 141 | Ifit1bl2   | -0.306250914074943 | 0.644073063709782  | interferon induced protein with tetratricopeptide repeats 1B like 2 [MGI:2148249] |
| 142 | Cd248      | -0.30931603785065  | 0.488131035216912  | CD248 antigen%2C endosialin [MGI:1917695]                                         |
| 143 | Cxcr5      | -0.317744346291985 | 0.339781623758111  | chemokine (C-X-C motif) receptor 5 [MGI:103567]                                   |
| 144 | Tab3       | -0.340828430103192 | 0.167918387640697  | TGF-beta activated kinase 1/MAP3K7 binding protein 3 [MGI:1913974]                |
| 145 | Ifitm1     | -0.351504600462899 | 0.463703711758953  | interferon induced transmembrane protein 1 [MGI:1915963]                          |
| 146 | Tnfsf13    | -0.3531913219406   | 0.767969914136406  | tumor necrosis factor (ligand) superfamily%2C member 13 [MGI:1916833]             |
| 147 | Traf7      | -0.354404143207957 | 0.243962747393115  | TNF receptor-associated factor 7 [MGI:3042141]                                    |
| 148 | Traf4      | -0.354776233235841 | 0.145902788082106  | TNF receptor associated factor 4 [MGI:1202880]                                    |
| 149 | Cd5        | -0.366414672330472 | 0.509964398932403  | CD5 antigen [MGI:88340]                                                           |
| 150 | Cd164l2    | -0.368973121207851 | 0.665988574066049  | CD164 sialomucin-like 2 [MGI:1916905]                                             |
| 151 | Il11ra1    | -0.376571620031636 | 0.168780101485804  | interleukin 11 receptor%2C alpha chain 1 [MGI:107426]                             |
| 152 | Cd1d1      | -0.397541152094583 | 0.312988256973641  | CD1d1 antigen [MGI:107674]                                                        |
| 153 | Tnfaip8l1  | -0.404611043775157 | 0.418202224200525  | tumor necrosis factor%2C alpha-induced protein 8-like 1 [MGI:1913693]             |
| 154 | Traf2      | -0.420060597222382 | 0.282692536467707  | TNF receptor-associated factor 2 [MGI:101835]                                     |
| 155 | Cd19       | -0.422564567738813 | 0.154592928678183  | CD19 antigen [MGI:88319]                                                          |
| 156 | Cd7        | -0.447641556066532 | 0.448004285696185  | CD7 antigen [MGI:88344]                                                           |
| 157 | Tnfsf9     | -0.465066419371445 | 0.626775070550494  | tumor necrosis factor (ligand) superfamily%2C member 9 [MGI:1101058]              |
| 158 | Il27ra     | -0.466774524214885 | 0.433084162135974  | interleukin 27 receptor%2C alpha [MGI:1355318]                                    |
| 159 | Cd3e       | -0.4747505667399   | 0.125574139298367  | CD3 antigen%2C epsilon polypeptide [MGI:88332]                                    |
| 160 | Ifitm6     | -0.475270426065061 | 0.706240452331619  | interferon induced transmembrane protein 6 [MGI:2686976]                          |
| 161 | Isg20l2    | -0.477014631462374 | 0.0747837934208667 | interferon stimulated exonuclease gene 20-like 2 [MGI:2140076]                    |

| No  | GeneSymbol | log2FoldChange      | pvalue             | Description                                                                                        |
|-----|------------|---------------------|--------------------|----------------------------------------------------------------------------------------------------|
| 162 | Tnfrsf19   | -0.501001972834406  | 0.510127042847175  | tumor necrosis factor receptor superfamily%2C member 19 [MGI:1352474]                              |
| 163 | Cd276      | -0.510407044202686  | 0.411913693606737  | CD276 antigen [MGI:2183926]                                                                        |
| 164 | Il1rap     | -0.5132633372059    | 0.150009976554486  | interleukin 1 receptor accessory protein [MGI:104975]                                              |
| 165 | Cd22       | -0.515061306956517  | 0.0906300279093225 | CD22 antigen [MGI:88322]                                                                           |
| 166 | Cd72       | -0.550794885805171  | 0.205164487278066  | CD72 antigen [MGI:88345]                                                                           |
| 167 | Cd2        | -0.556721259658047  | 0.157304927935754  | CD2 antigen [MGI:88320]                                                                            |
| 168 | Cd79b      | -0.557460274514082  | 0.0449436408434704 | CD79B antigen [MGI:96431]                                                                          |
| 169 | Il12a      | -0.59935881869844   | 0.461121049267269  | interleukin 12a [MGI:96539]                                                                        |
| 170 | Ccl21a     | -0.62490063151664   | 0.0387577024391111 | chemokine (C-C motif) ligand 21A (serine) [MGI:1349183]                                            |
| 171 | Cxcr6      | -0.635423901019398  | 0.246146904526919  | chemokine (C-X-C motif) receptor 6 [MGI:1934582]                                                   |
| 172 | Cd177      | -0.642889486682101  | 0.567755011171611  | CD177 antigen [MGI:1916141]                                                                        |
| 173 | Cd79a      | -0.646303359307361  | 0.0285458769970964 | CD79A antigen (immunoglobulin-associated alpha) [MGI:101774]                                       |
| 174 | Tnfrsf13c  | -0.665721568393233  | 0.0720567059126173 | tumor necrosis factor receptor superfamily%2C member 13c [MGI:1919299]                             |
| 175 | Ccl27a     | -0.681707039535101  | 0.417509272608422  | chemokine (C-C motif) ligand 27A [MGI:1343459]                                                     |
| 176 | Ccl4       | -0.685727309573982  | 0.539753474640845  | chemokine (C-C motif) ligand 4 [MGI:98261]                                                         |
| 177 | Ccr6       | -0.694476215862164  | 0.619737079952256  | chemokine (C-C motif) receptor 6 [MGI:1333797]                                                     |
| 178 | Cxcl1      | -0.700942929627174  | 0.654887961143336  | chemokine (C-X-C motif) ligand 1 [MGI:108068]                                                      |
| 179 | Irf4       | -0.72205017982433   | 0.161565988847389  | interferon regulatory factor 4 [MGI:1096873]                                                       |
| 180 | Tnfrsf10b  | -0.734814660202982  | 0.28905673637562   | tumor necrosis factor receptor superfamily%2C member 10b [MGI:1341090]                             |
| 181 | Cxcr4      | -0.74329812575435   | 0.108228075451336  | chemokine (C-X-C motif) receptor 4 [MGI:109563]                                                    |
| 182 | Il34       | -0.747078147721499  | 0.191002075584726  | interleukin 34 [MGI:1923777]                                                                       |
| 183 | Cd6        | -0.76222624057118   | 0.0886634320280111 | CD6 antigen [MGI:103566]                                                                           |
| 184 | Ifrd2      | -0.774551363074548  | 0.002758188167617  | interferon-related developmental regulator 2 [MGI:1316708]                                         |
| 185 | Cd59b      | -0.774993782148913  | 0.412114269120931  | CD59b antigen [MGI:1888996]                                                                        |
| 186 | Ccl12      | -0.781351127148692  | 0.730692052657286  | chemokine (C-C motif) ligand 12 [MGI:108224]                                                       |
| 187 | Cd244a     | -0.792001778434895  | 0.254272884477441  | CD244 molecule A [MGI:109294]                                                                      |
| 188 | Tnfrsf4    | -0.813199125031461  | 0.329256467700555  | tumor necrosis factor receptor superfamily%2C member 4 [MGI:104512]                                |
| 189 | Ccl25      | -0.819852239000792  | 0.116609485135265  | chemokine (C-C motif) ligand 25 [MGI:1099448]                                                      |
| 190 | Thr5       | -0.822244665532003  | 0.278984012966968  | toll-like receptor 5 [MGI:1858171]                                                                 |
| 191 | Tnfrsf12a  | -0.834400169261613  | 0.0470276259055394 | tumor necrosis factor receptor superfamily%2C member 12a [MGI:1351484]                             |
| 192 | Cd101      | -0.843284005099002  | 0.56062108426356   | CD101 antigen [MGI:2685862]                                                                        |
| 193 | Ccl17      | -0.868375100052798  | 0.619456556363792  | chemokine (C-C motif) ligand 17 [MGI:1329039]                                                      |
| 194 | Tnfrsf8    | -0.90152624948967   | 0.595012668763502  | tumor necrosis factor receptor superfamily%2C member 8 [MGI:99908]                                 |
| 195 | Cd209b     | -0.929341041368995  | 0.295272710620381  | CD209b antigen [MGI:1916415]                                                                       |
| 196 | Tnfsf14    | -0.940562116761458  | 0.162221343437285  | tumor necrosis factor (ligand) superfamily%2C member 14 [MGI:1355317]                              |
| 197 | Tnfrsf14   | -0.943905408063596  | 0.138037923609183  | tumor necrosis factor receptor superfamily%2C member 14 (herpesvirus entry mediator) [MGI:2675303] |
| 198 | Ccr3       | -0.944648285264076  | 0.030108701797512  | chemokine (C-C motif) receptor 3 [MGI:104616]                                                      |
| 199 | Cd200r3    | -0.989252484834151  | 0.585518225819119  | CD200 receptor 3 [MGI:1921853]                                                                     |
| 200 | Il17rd     | 0.00513071661934416 | 0.99337633602419   | interleukin 17 receptor D [MGI:2159727]                                                            |
| 201 | Il4ra      | 0.00739254912889015 | 0.983169465739287  | interleukin 4 receptor%2C alpha [MGI:105367]                                                       |



| No  | GeneSymbol | log2FoldChange     | pvalue            | Description                                                                       |
|-----|------------|--------------------|-------------------|-----------------------------------------------------------------------------------|
| 202 | Cd59a      | 0.0102116284127143 | 0.976010104114609 | CD59a antigen [MGI:109177]                                                        |
| 203 | Ck1f       | 0.0238214701502909 | 0.960563076130916 | chemokine-like factor [MGI:1922708]                                               |
| 204 | Irak1      | 0.026486829481437  | 0.885228447087486 | interleukin-1 receptor-associated kinase 1 [MGI:107420]                           |
| 205 | Cx3cl1     | 0.0265295155270961 | 0.91849578472727  | chemokine (C-X3-C motif) ligand 1 [MGI:1097153]                                   |
| 206 | Cd9        | 0.027620133039154  | 0.88881182749348  | CD9 antigen [MGI:88348]                                                           |
| 207 | Ifnar2     | 0.0277789424426939 | 0.938050551044685 | interferon (alpha and beta) receptor 2 [MGI:1098243]                              |
| 208 | Irf9       | 0.0290158214364899 | 0.923173396286491 | interferon regulatory factor 9 [MGI:107587]                                       |
| 209 | Ilf3       | 0.0313177736732911 | 0.913577176347176 | interleukin enhancer binding factor 3 [MGI:1339973]                               |
| 210 | Cd44       | 0.0314990795108843 | 0.954901455287546 | CD44 antigen [MGI:88338]                                                          |
| 211 | Ilf2       | 0.0382480175469117 | 0.894506929752381 | interleukin enhancer binding factor 2 [MGI:1915031]                               |
| 212 | Tirap      | 0.0411132352722402 | 0.906414663139015 | toll-interleukin 1 receptor (TIR) domain-containing adaptor protein [MGI:2152213] |
| 213 | Irf2       | 0.0432815415110392 | 0.890236767135595 | interferon regulatory factor 2 [MGI:96591]                                        |
| 214 | Cx3cr1     | 0.0499006672647942 | 0.920875013226655 | chemokine (C-X3-C motif) receptor 1 [MGI:1333815]                                 |
| 215 | Cd99l2     | 0.0688619278449657 | 0.787982668090571 | CD99 antigen-like 2 [MGI:2177151]                                                 |
| 216 | Il21r      | 0.0768406839215812 | 0.824595483251099 | interleukin 21 receptor [MGI:1890475]                                             |
| 217 | Irf6       | 0.0862563907548403 | 0.772758533576259 | interferon regulatory factor 6 [MGI:1859211]                                      |
| 218 | Tnip1      | 0.0862973184078723 | 0.799608191306511 | TNFAIP3 interacting protein 1 [MGI:1926194]                                       |
| 219 | Cd8a       | 0.0863330732448746 | 0.83367861044911  | CD8 antigen%2C alpha chain [MGI:88346]                                            |
| 220 | Ifi208     | 0.101515088829744  | 0.875714752187647 | interferon activated gene 208 [MGI:2442822]                                       |
| 221 | Trap1      | 0.105804771037286  | 0.693273950926281 | TNF receptor-associated protein 1 [MGI:1915265]                                   |
| 222 | Traf5      | 0.107089160712184  | 0.787431233431759 | TNF receptor-associated factor 5 [MGI:107548]                                     |
| 223 | Cd52       | 0.109995915639926  | 0.788456525738831 | CD52 antigen [MGI:1346088]                                                        |
| 224 | Ifitm10    | 0.113447376555428  | 0.903940732331662 | interferon induced transmembrane protein 10 [MGI:2444776]                         |
| 225 | Cd302      | 0.113459950104681  | 0.764224809209977 | CD302 antigen [MGI:1913455]                                                       |
| 226 | Il10rb     | 0.113809125001997  | 0.667825422423451 | interleukin 10 receptor%2C beta [MGI:109380]                                      |
| 227 | Ccl9       | 0.12055548778658   | 0.808037266625029 | chemokine (C-C motif) ligand 9 [MGI:104533]                                       |
| 228 | Ifitm2     | 0.125432233233118  | 0.767097125344831 | interferon induced transmembrane protein 2 [MGI:1933382]                          |
| 229 | Il1r2      | 0.129088850568251  | 0.958651526042557 | interleukin 1 receptor%2C type II [MGI:96546]                                     |
| 230 | Cd40lg     | 0.129876739731585  | 0.898019102218526 | CD40 ligand [MGI:88337]                                                           |
| 231 | Cd200      | 0.130466769985956  | 0.717910457681922 | CD200 antigen [MGI:1196990]                                                       |
| 232 | Traf6      | 0.131736759795426  | 0.586205202123286 | TNF receptor-associated factor 6 [MGI:108072]                                     |
| 233 | Cxcl12     | 0.131897577372543  | 0.636476520310303 | chemokine (C-X-C motif) ligand 12 [MGI:103556]                                    |
| 234 | Tnip2      | 0.132249687238207  | 0.763415356735593 | TNFAIP3 interacting protein 2 [MGI:2386643]                                       |
| 235 | Cd8b1      | 0.135740657735474  | 0.770648048898817 | CD8 antigen%2C beta chain 1 [MGI:88347]                                           |
| 236 | Cd209d     | 0.138580723875371  | 0.903519791727598 | CD209d antigen [MGI:2157947]                                                      |
| 237 | Il13ra1    | 0.149009290423139  | 0.507221500009348 | interleukin 13 receptor%2C alpha 1 [MGI:105052]                                   |
| 238 | Cd96       | 0.152502446058657  | 0.776605127501405 | CD96 antigen [MGI:1934368]                                                        |
| 239 | Ccl2       | 0.153529336985823  | 0.893853227125985 | chemokine (C-C motif) ligand 2 [MGI:98259]                                        |
| 240 | Il6ra      | 0.156916638037613  | 0.70305767374047  | interleukin 6 receptor%2C alpha [MGI:105304]                                      |
| 241 | Cd151      | 0.158827464688539  | 0.52866558889635  | CD151 antigen [MGI:1096360]                                                       |

| No  | GeneSymbol | log2FoldChange    | pvalue            | Description                                                                             |
|-----|------------|-------------------|-------------------|-----------------------------------------------------------------------------------------|
| 242 | Cd84       | 0.160278477783832 | 0.717403377285146 | CD84 antigen [MGI:1336885]                                                              |
| 243 | Cd2ap      | 0.162294234715939 | 0.43564983956     | CD2-associated protein [MGI:1330281]                                                    |
| 244 | Tnfrsf22   | 0.186662763039352 | 0.790656451244977 | tumor necrosis factor receptor superfamily%2C member 22 [MGI:1930270]                   |
| 245 | Il1a       | 0.191026530637798 | 0.803032437723056 | interleukin 1 alpha [MGI:96542]                                                         |
| 246 | Il10       | 0.200036963874014 | 0.861349734901978 | interleukin 10 [MGI:96537]                                                              |
| 247 | Ifi2712a   | 0.202974100024806 | 0.604793311260638 | interferon%2C alpha-inducible protein 27 like 2A [MGI:1924183]                          |
| 248 | Ccr1       | 0.206756003253819 | 0.804433596149622 | chemokine (C-C motif) receptor 1 [MGI:104618]                                           |
| 249 | Tnfrsf1a   | 0.216758344197197 | 0.568820085273657 | tumor necrosis factor receptor superfamily%2C member 1a [MGI:1314884]                   |
| 250 | Cd320      | 0.216796824267618 | 0.441663905129712 | CD320 antigen [MGI:1860083]                                                             |
| 251 | Cd300lg    | 0.219165869267506 | 0.533750920504978 | CD300 molecule like family member G [MGI:1289168]                                       |
| 252 | Ccr9       | 0.226191808043606 | 0.740601009223195 | chemokine (C-C motif) receptor 9 [MGI:1341902]                                          |
| 253 | Tnfaip1    | 0.231173458162557 | 0.317045061246565 | tumor necrosis factor%2C alpha-induced protein 1 (endothelial) [MGI:104961]             |
| 254 | Tnfaip2    | 0.260127042564465 | 0.790594881335235 | tumor necrosis factor%2C alpha-induced protein 2 [MGI:104960]                           |
| 255 | Ifi35      | 0.264990192995765 | 0.468459597181812 | interferon-induced protein 35 [MGI:1917360]                                             |
| 256 | Ccr2       | 0.268780062209503 | 0.661049557026141 | chemokine (C-C motif) receptor-like 2 [MGI:1920904]                                     |
| 257 | Irf8       | 0.269125923434047 | 0.5164479892558   | interferon regulatory factor 8 [MGI:96395]                                              |
| 258 | Tnfrsf25   | 0.277689055569489 | 0.850778288101737 | tumor necrosis factor receptor superfamily%2C member 25 [MGI:1934667]                   |
| 259 | Cxcl13     | 0.278198213844974 | 0.461421348572156 | chemokine (C-X-C motif) ligand 13 [MGI:1888499]                                         |
| 260 | Ifi27      | 0.280439639903934 | 0.313441233522925 | interferon%2C alpha-inducible protein 27 [MGI:1277180]                                  |
| 261 | Cd63-ps    | 0.285090156040785 | 0.495174123252357 | CD63 antigen%2C pseudogene [MGI:105972]                                                 |
| 262 | Cd247      | 0.286518708570985 | 0.660736906784767 | CD247 antigen [MGI:88334]                                                               |
| 263 | Cd36       | 0.297039141349428 | 0.47347312405646  | CD36 molecule [MGI:107899]                                                              |
| 264 | Cd300a     | 0.30694788102953  | 0.738710329519867 | CD300A molecule [MGI:2443411]                                                           |
| 265 | Ifi209     | 0.307683769336104 | 0.534199412949758 | interferon activated gene 209 [MGI:2138243]                                             |
| 266 | Cd80       | 0.308807063363836 | 0.726412099052183 | CD80 antigen [MGI:101775]                                                               |
| 267 | Cd63       | 0.314169500463518 | 0.463002724859968 | CD63 antigen [MGI:99529]                                                                |
| 268 | Cd86       | 0.319277438806425 | 0.452098037383313 | CD86 antigen [MGI:101773]                                                               |
| 269 | Tnfrsf11b  | 0.320909783291323 | 0.618793761090844 | tumor necrosis factor receptor superfamily%2C member 11b (osteoprotegerin) [MGI:109587] |
| 270 | Irak2      | 0.32185951363442  | 0.168398294074297 | interleukin-1 receptor-associated kinase 2 [MGI:2429603]                                |
| 271 | Il2rg      | 0.323152175607058 | 0.522793973111981 | interleukin 2 receptor%2C gamma chain [MGI:96551]                                       |
| 272 | Ticam2     | 0.323168581569721 | 0.748766241641418 | toll-like receptor adaptor molecule 2 [MGI:3040056]                                     |
| 273 | Irak4      | 0.334858371752397 | 0.432925032431114 | interleukin-1 receptor-associated kinase 4 [MGI:2182474]                                |
| 274 | Il17rc     | 0.337011365860883 | 0.413663287657022 | interleukin 17 receptor C [MGI:2159336]                                                 |
| 275 | Irf5       | 0.341563089506558 | 0.431319270945566 | interferon regulatory factor 5 [MGI:1350924]                                            |
| 276 | Tlr9       | 0.359433225993958 | 0.438210116745059 | toll-like receptor 9 [MGI:1932389]                                                      |
| 277 | Cd4        | 0.360696778002721 | 0.342583745463306 | CD4 antigen [MGI:88335]                                                                 |
| 278 | Tlr11      | 0.36084038903355  | 0.729457808946374 | toll-like receptor 11 [MGI:3045226]                                                     |
| 279 | Cxcl16     | 0.360905208325492 | 0.409755719309216 | chemokine (C-X-C motif) ligand 16 [MGI:1932682]                                         |
| 280 | Il18       | 0.367461207668144 | 0.39996045817076  | interleukin 18 [MGI:107936]                                                             |
| 281 | Cd38       | 0.370302109808626 | 0.475387175559313 | CD38 antigen [MGI:107474]                                                               |

| No  | GeneSymbol | log2FoldChange    | pvalue             | Description                                                                       |
|-----|------------|-------------------|--------------------|-----------------------------------------------------------------------------------|
| 282 | Il18r1     | 0.370921546138932 | 0.564801939770483  | interleukin 18 receptor 1 [MGI:105383]                                            |
| 283 | Ccr10      | 0.371721899802993 | 0.842431419149447  | chemokine (C-C motif) receptor 10 [MGI:1096320]                                   |
| 284 | Ccl11      | 0.376497540726267 | 0.796991146135565  | chemokine (C-C motif) ligand 11 [MGI:103576]                                      |
| 285 | Il10ra     | 0.395846678564511 | 0.407341232648807  | interleukin 10 receptor%2C alpha [MGI:96538]                                      |
| 286 | Tlr4       | 0.414603570620502 | 0.513123315840282  | toll-like receptor 4 [MGI:96824]                                                  |
| 287 | Cd48       | 0.425811066224103 | 0.42661165173294   | CD48 antigen [MGI:88339]                                                          |
| 288 | Ccl24      | 0.44568136391711  | 0.546478513960056  | chemokine (C-C motif) ligand 24 [MGI:1928953]                                     |
| 289 | Il7        | 0.462283316068574 | 0.413779254495012  | interleukin 7 [MGI:96561]                                                         |
| 290 | Tnfaip8    | 0.476598114851813 | 0.159349977018754  | tumor necrosis factor%2C alpha-induced protein 8 [MGI:2147191]                    |
| 291 | Il3ra      | 0.480610921946447 | 0.588602239660802  | interleukin 3 receptor%2C alpha chain [MGI:96553]                                 |
| 292 | Tnfsf13b   | 0.486603326388042 | 0.442941196616557  | tumor necrosis factor (ligand) superfamily%2C member 13b [MGI:1344376]            |
| 293 | Cd160      | 0.495277421021092 | 0.540722679573255  | CD160 antigen [MGI:1860383]                                                       |
| 294 | Cd164      | 0.496710439218781 | 0.0396289326584156 | CD164 antigen [MGI:1859568]                                                       |
| 295 | Ifitm3     | 0.518051945601705 | 0.297214760905514  | interferon induced transmembrane protein 3 [MGI:1913391]                          |
| 296 | Cd300c2    | 0.518948611837484 | 0.334547395177006  | CD300C molecule 2 [MGI:2153249]                                                   |
| 297 | Xcr1       | 0.520060738149727 | 0.29462674065544   | chemokine (C motif) receptor 1 [MGI:1346338]                                      |
| 298 | Tnfrsf1b   | 0.526115663768481 | 0.339980450880836  | tumor necrosis factor receptor superfamily%2C member 1b [MGI:1314883]             |
| 299 | Il12b      | 0.534668232978742 | 0.739536989132326  | interleukin 12b [MGI:96540]                                                       |
| 300 | Tnfrsf9    | 0.54613525787547  | 0.585404282771568  | tumor necrosis factor receptor superfamily%2C member 9 [MGI:1101059]              |
| 301 | Ifi30      | 0.549309759634616 | 0.245151152483171  | interferon gamma inducible protein 30 [MGI:2137648]                               |
| 302 | Ifih1      | 0.568910147575179 | 0.230702956149094  | interferon induced with helicase C domain 1 [MGI:1918836]                         |
| 303 | Tlr1       | 0.577677252560117 | 0.212798127307888  | toll-like receptor 1 [MGI:1341295]                                                |
| 304 | Tnfaip8l2  | 0.581854332709144 | 0.301228893597883  | tumor necrosis factor%2C alpha-induced protein 8-like 2 [MGI:1917019]             |
| 305 | Tnfsf10    | 0.585075608646759 | 0.257240643433837  | tumor necrosis factor (ligand) superfamily%2C member 10 [MGI:107414]              |
| 306 | Il15ra     | 0.590515300125374 | 0.191111001889493  | interleukin 15 receptor%2C alpha chain [MGI:104644]                               |
| 307 | Ccl19-ps3  | 0.597266702594463 | 0.799583711791977  | chemokine (C-C motif) ligand 19%2C pseudogene 3 [MGI:1891391]                     |
| 308 | Ifi214     | 0.618898299245183 | 0.302582353901013  | interferon activated gene 214 [MGI:3584522]                                       |
| 309 | Cd55os     | 0.620989017005325 | 0.58468517665532   | CD55 molecule%2C opposite strand sequence [MGI:3783116]                           |
| 310 | Il36g      | 0.633849083375402 | 0.64362908428729   | interleukin 36G [MGI:2449929]                                                     |
| 311 | Tlr2       | 0.646228293480253 | 0.357737146314946  | toll-like receptor 2 [MGI:1346060]                                                |
| 312 | Cd5l       | 0.648623696747702 | 0.506838322648136  | CD5 antigen-like [MGI:1334419]                                                    |
| 313 | Tnfrsf23   | 0.658366047324219 | 0.347739378749646  | tumor necrosis factor receptor superfamily%2C member 23 [MGI:1930269]             |
| 314 | Ifit1bl1   | 0.673115921690766 | 0.178581693161335  | interferon induced protein with tetratricopeptide repeats 1B like 1 [MGI:3650685] |
| 315 | Il17re     | 0.687493646791673 | 0.262483225198142  | interleukin 17 receptor E [MGI:1889371]                                           |
| 316 | Il12rb2    | 0.694255752399446 | 0.553894650240591  | interleukin 12 receptor%2C beta 2 [MGI:1270861]                                   |
| 317 | Cd68       | 0.706012525921867 | 0.444077832266292  | CD68 antigen [MGI:88342]                                                          |
| 318 | Ifnk       | 0.707028552922134 | 0.610097711845782  | interferon kappa [MGI:2683287]                                                    |
| 319 | Tnfaip3    | 0.711678512791356 | 0.136503202427365  | tumor necrosis factor%2C alpha-induced protein 3 [MGI:1196377]                    |
| 320 | Xcl1       | 0.719149525032515 | 0.551658955809747  | chemokine (C motif) ligand 1 [MGI:104593]                                         |
| 321 | Il17rb     | 0.728733847545622 | 0.0823082183667041 | interleukin 17 receptor B [MGI:1355292]                                           |

| No  | GeneSymbol | log2FoldChange    | pvalue             | Description                                                                                                         |
|-----|------------|-------------------|--------------------|---------------------------------------------------------------------------------------------------------------------|
| 322 | Cd14       | 0.736580778818048 | NA                 | CD14 antigen [MGI:88318]                                                                                            |
| 323 | Irak3      | 0.748118738352667 | 0.259806063876885  | interleukin-1 receptor-associated kinase 3 [MGI:1921164]                                                            |
| 324 | Igtp       | 0.75257001294549  | 0.436244305875846  | interferon gamma induced GTPase [MGI:107729]                                                                        |
| 325 | Tlr12      | 0.75347685573786  | 0.406123994744634  | toll-like receptor 12 [MGI:3045221]                                                                                 |
| 326 | Il1rl2     | 0.761647538189894 | 0.396361836632167  | interleukin 1 receptor-like 2 [MGI:1913107]                                                                         |
| 327 | Cd200r1    | 0.761811704958546 | 0.404805524641853  | CD200 receptor 1 [MGI:1889024]                                                                                      |
| 328 | Ifit1      | 0.769293279682255 | 0.103999776048812  | interferon-induced protein with tetratricopeptide repeats 1 [MGI:99450]                                             |
| 329 | Tnfrsf26   | 0.773408487626486 | 0.194270828379941  | tumor necrosis factor receptor superfamily%2C member 26 [MGI:2651928]                                               |
| 330 | Il15       | 0.774435062438784 | 0.156612911563868  | interleukin 15 [MGI:103014]                                                                                         |
| 331 | Tnfrsf21   | 0.78388522183269  | 0.0556791543322346 | tumor necrosis factor receptor superfamily%2C member 21 [MGI:2151075]                                               |
| 332 | Il6        | 0.784088647651479 | 0.799601734734318  | interleukin 6 [MGI:96559]                                                                                           |
| 333 | Il4i1      | 0.78489690225911  | 0.793844874361501  | interleukin 4 induced 1 [MGI:109552]                                                                                |
| 334 | Ifi203     | 0.80892999165587  | 0.0154327206509506 | interferon activated gene 203 [MGI:96428]                                                                           |
| 335 | Tnfsf12    | 0.82275185157462  | 0.0141268931997885 | tumor necrosis factor (ligand) superfamily%2C member 12 [MGI:1196259]                                               |
| 336 | Irf1       | 0.823566729930969 | 0.336165961331771  | interferon regulatory factor 1 [MGI:96590]                                                                          |
| 337 | Ccl19      | 0.826239875686573 | 0.086863645609314  | chemokine (C-C motif) ligand 19 [MGI:1346316]                                                                       |
| 338 | Tlr13      | 0.83655053068026  | 0.405969683434862  | toll-like receptor 13 [MGI:3045213]                                                                                 |
| 339 | Tlr7       | 0.866985851711395 | 0.0348204488472539 | toll-like receptor 7 [MGI:2176882]                                                                                  |
| 340 | Cd180      | 0.870181479734588 | 0.0226654806444274 | CD180 antigen [MGI:1194924]                                                                                         |
| 341 | Cd300lf    | 0.876786396663099 | 0.29538710772403   | CD300 molecule like family member F [MGI:2442359]                                                                   |
| 342 | Ccr4       | 0.880698824367088 | 0.689411374475049  | chemokine (C-C motif) receptor 4 [MGI:107824]                                                                       |
| 343 | Cd209g     | 0.894387762610069 | 0.826504160611269  | CD209g antigen [MGI:1917442]                                                                                        |
| 344 | Cd300ld5   | 0.894387762610069 | 0.826504160611269  | CD300 molecule like family member D5 [MGI:3702661]                                                                  |
| 345 | Cxcr1      | 0.894387762610069 | 0.826504160611269  | chemokine (C-X-C motif) receptor 1 [MGI:2448715]                                                                    |
| 346 | Il1rap1l   | 0.894387762610069 | 0.826504160611269  | interleukin 1 receptor accessory protein-like 1 [MGI:2687319]                                                       |
| 347 | Il11ra2    | 0.894387762610069 | 0.826504160611269  | interleukin 11 receptor%2C alpha chain 2 [MGI:109123]                                                               |
| 348 | Il23r      | 0.894387762610069 | 0.826504160611269  | interleukin 23 receptor [MGI:2181693]                                                                               |
| 349 | Tnfsf4     | 0.894387762610069 | 0.826504160611269  | tumor necrosis factor (ligand) superfamily%2C member 4 [MGI:104511]                                                 |
| 350 | Il5ra      | 0.925051685831226 | 0.274124747115368  | interleukin 5 receptor%2C alpha [MGI:96558]                                                                         |
| 351 | Tnfaip8l3  | 0.936493574247947 | 0.317295567591398  | tumor necrosis factor%2C alpha-induced protein 8-like 3 [MGI:2685363]                                               |
| 352 | Cd109      | 0.946313848738431 | 0.512226569781659  | CD109 antigen [MGI:2445221]                                                                                         |
| 353 | Cd74       | 0.94768603089005  | 0.215407926020065  | CD74 antigen (invariant polypeptide of major histocompatibility complex%2C class II antigen-associated) [MGI:96534] |
| 354 | Iigp1      | 0.95105303830093  | 0.14068039412098   | interferon inducible GTPase 1 [MGI:1926259]                                                                         |
| 355 | Ccr2       | 0.962866303293283 | 0.383010006397212  | chemokine (C-C motif) receptor 2 [MGI:106185]                                                                       |
| 356 | Tlr3       | 0.978899620049289 | 0.0145708767837963 | toll-like receptor 3 [MGI:2156367]                                                                                  |
| 357 | Il27       | 0.979079743081561 | 0.505610430223945  | interleukin 27 [MGI:2384409]                                                                                        |
| 358 | Ifnlr1     | 0.986982264707977 | 0.23915438872705   | interferon lambda receptor 1 [MGI:2429859]                                                                          |
| 359 | Ifi47      | 0.988567758252489 | 0.299119205947221  | interferon gamma inducible protein 47 [MGI:99448]                                                                   |
| 360 | Cd209c     | NA                | NA                 | CD209c antigen [MGI:2157945]                                                                                        |
| 361 | Cd209e     | NA                | NA                 | CD209e antigen [MGI:2157948]                                                                                        |

| No  | GeneSymbol | log2FoldChange | pvalue | Description                                                   |
|-----|------------|----------------|--------|---------------------------------------------------------------|
| 362 | Cd300ld4   | NA             | NA     | CD300 molecule like family member D4 [MGI:3702658]            |
| 363 | Cd70       | NA             | NA     | CD70 antigen [MGI:1195273]                                    |
| 364 | Cd9-ps     | NA             | NA     | Cd9 antigen%2C pseudogene [MGI:3645134]                       |
| 365 | Ccl19-ps1  | NA             | NA     | chemokine (C-C motif) ligand 19%2C pseudogene 1 [MGI:1891387] |
| 366 | Ccl20      | NA             | NA     | chemokine (C-C motif) ligand 20 [MGI:1329031]                 |
| 367 | Ccl21b     | NA             | NA     | chemokine (C-C motif) ligand 21B (leucine) [MGI:1349182]      |
| 368 | Ccl21d     | NA             | NA     | chemokine (C-C motif) ligand 21D [MGI:5434896]                |
| 369 | Ccl26      | NA             | NA     | chemokine (C-C motif) ligand 26 [MGI:3589281]                 |
| 370 | Ccl27b     | NA             | NA     | chemokine (C-C motif) ligand 27b [MGI:1891389]                |
| 371 | Cxcl15     | NA             | NA     | chemokine (C-X-C motif) ligand 15 [MGI:1339941]               |
| 372 | Ifna1      | NA             | NA     | interferon alpha 1 [MGI:107668]                               |
| 373 | Ifna11     | NA             | NA     | interferon alpha 11 [MGI:109210]                              |
| 374 | Ifna12     | NA             | NA     | interferon alpha 12 [MGI:2676324]                             |
| 375 | Ifna13     | NA             | NA     | interferon alpha 13 [MGI:2667155]                             |
| 376 | Ifna14     | NA             | NA     | interferon alpha 14 [MGI:3641425]                             |
| 377 | Ifna15     | NA             | NA     | interferon alpha 15 [MGI:3649418]                             |
| 378 | Ifna16     | NA             | NA     | interferon alpha 16 [MGI:3649260]                             |
| 379 | Ifna2      | NA             | NA     | interferon alpha 2 [MGI:107666]                               |
| 380 | Ifna4      | NA             | NA     | interferon alpha 4 [MGI:107664]                               |
| 381 | Ifna5      | NA             | NA     | interferon alpha 5 [MGI:107663]                               |
| 382 | Ifna6      | NA             | NA     | interferon alpha 6 [MGI:107662]                               |
| 383 | Ifna7      | NA             | NA     | interferon alpha 7 [MGI:107661]                               |
| 384 | Ifna9      | NA             | NA     | interferon alpha 9 [MGI:107659]                               |
| 385 | Ifnab      | NA             | NA     | interferon alpha B [MGI:1097683]                              |
| 386 | Ifna-ps1   | NA             | NA     | interferon alpha gene%2C pseudogene 1 [MGI:107669]            |
| 387 | Ifnb1      | NA             | NA     | interferon beta 1%2C fibroblast [MGI:107657]                  |
| 388 | Ifne       | NA             | NA     | interferon epsilon [MGI:2667156]                              |
| 389 | Ifnl2      | NA             | NA     | interferon lambda 2 [MGI:3647279]                             |
| 390 | Ifnl3      | NA             | NA     | interferon lambda 3 [MGI:2450574]                             |
| 391 | Ifnz       | NA             | NA     | interferon zeta [MGI:2448469]                                 |
| 392 | Il1f10     | NA             | NA     | interleukin 1 family%2C member 10 [MGI:2652548]               |
| 393 | Il1rapl2   | NA             | NA     | interleukin 1 receptor accessory protein-like 2 [MGI:1913106] |
| 394 | Il13       | NA             | NA     | interleukin 13 [MGI:96541]                                    |
| 395 | Il17a      | NA             | NA     | interleukin 17A [MGI:107364]                                  |
| 396 | Il17b      | NA             | NA     | interleukin 17B [MGI:1928397]                                 |
| 397 | Il19       | NA             | NA     | interleukin 19 [MGI:1890472]                                  |
| 398 | Il2        | NA             | NA     | interleukin 2 [MGI:96548]                                     |
| 399 | Il20       | NA             | NA     | interleukin 20 [MGI:1890473]                                  |
| 400 | Il20ra     | NA             | NA     | interleukin 20 receptor%2C alpha [MGI:3605069]                |
| 401 | Il22       | NA             | NA     | interleukin 22 [MGI:1355307]                                  |

| No  | GeneSymbol | log2FoldChange | pvalue | Description                                                     |
|-----|------------|----------------|--------|-----------------------------------------------------------------|
| 402 | Il22b      | NA             | NA     | interleukin 22B [MGI:2151139]                                   |
| 403 | Il23a      | NA             | NA     | interleukin 23%2C alpha subunit p19 [MGI:1932410]               |
| 404 | Il25       | NA             | NA     | interleukin 25 [MGI:2155888]                                    |
| 405 | Il3        | NA             | NA     | interleukin 3 [MGI:96552]                                       |
| 406 | Il31       | NA             | NA     | interleukin 31 [MGI:1923649]                                    |
| 407 | Il36a      | NA             | NA     | interleukin 36A [MGI:1859324]                                   |
| 408 | Il36b      | NA             | NA     | interleukin 36B [MGI:1916927]                                   |
| 409 | Il5        | NA             | NA     | interleukin 5 [MGI:96557]                                       |
| 410 | Il9        | NA             | NA     | interleukin 9 [MGI:96563]                                       |
| 411 | Tgif1-ps   | NA             | NA     | TGFB-induced factor homeobox 1%2C pseudogene [MGI:3779880]      |
| 412 | Tgif2      | NA             | NA     | TGFB-induced factor homeobox 2 [MGI:1915299]                    |
| 413 | Tgif2lx1   | NA             | NA     | TGFB-induced factor homeobox 2-like%2C X-linked 1 [MGI:2387796] |
| 414 | Tgif2lx2   | NA             | NA     | TGFB-induced factor homeobox 2-like%2C X-linked 2 [MGI:3800824] |
| 415 | Tgif2-ps1  | NA             | NA     | TGFB-induced factor homeobox 2%2C pseudogene 1 [MGI:3649223]    |

### Supplementary Table S3C

| No | GeneSymbol | log2FoldChange       | pvalue               | Description                                                           |
|----|------------|----------------------|----------------------|-----------------------------------------------------------------------|
| 1  | Cd300ld4   | -409,992,462,243,739 | 1.85E+00             | CD300 molecule like family member D4 [MGI:3702658]                    |
| 2  | Il21       | -278,132,231,991,798 | 2.10E+09             | interleukin 21 [MGI:1890474]                                          |
| 3  | Cd209e     | -275,156,098,462,265 | 0.00335308854523479  | CD209e antigen [MGI:2157948]                                          |
| 4  | Tgif2-ps2  | -258,559,071,286,171 | 0.000300691960238157 | TGFB-induced factor homeobox 2%2C pseudogene 2 [MGI:3805950]          |
| 5  | Il13ra2    | -185,023,661,987,733 | 8.49E-29             | interleukin 13 receptor%2C alpha 2 [MGI:1277954]                      |
| 6  | Il4        | -176,771,043,178,717 | 0.00587373036912097  | interleukin 4 [MGI:96556]                                             |
| 7  | Ccr111     | -167,556,359,352,467 | 4.75E+07             | chemokine (C-C motif) receptor 1-like 1 [MGI:104617]                  |
| 8  | Ccl22      | -152,192,513,662,698 | 0.000405311671056544 | chemokine (C-C motif) ligand 22 [MGI:1306779]                         |
| 9  | Ccr6       | -149,131,418,741,072 | 3.37E+04             | chemokine (C-C motif) receptor 6 [MGI:1333797]                        |
| 10 | Tnfrsf8    | -143,600,061,613,556 | 1.01E+09             | tumor necrosis factor receptor superfamily%2C member 8 [MGI:99908]    |
| 11 | Il23r      | -137,075,627,434,067 | 0.00660521731683372  | interleukin 23 receptor [MGI:2181693]                                 |
| 12 | Tnfrsf9    | -129,353,417,056,352 | 0.0107731970294349   | tumor necrosis factor receptor superfamily%2C member 9 [MGI:1101059]  |
| 13 | Tnfsf8     | -109,496,690,026,791 | 2.56E+09             | tumor necrosis factor (ligand) superfamily%2C member 8 [MGI:88328]    |
| 14 | Tnfrsf19   | -102,516,971,073,293 | 2.37E+07             | tumor necrosis factor receptor superfamily%2C member 19 [MGI:1352474] |
| 15 | Cd209a     | -22,384,928,030,418  | 2.20E-58             | CD209a antigen [MGI:2157942]                                          |
| 16 | Ccl24      | -14,243,966,528,479  | 0.000382346343649331 | chemokine (C-C motif) ligand 24 [MGI:1928953]                         |
| 17 | Tlr2       | 101,307,952,521,908  | 1.86E+07             | toll-like receptor 2 [MGI:1346060]                                    |
| 18 | Tnfaip2    | 102,192,162,448,255  | 0.0232894217011961   | tumor necrosis factor%2C alpha-induced protein 2 [MGI:104960]         |
| 19 | Ifi204     | 104,632,502,092,079  | 0.0307452258855603   | interferon activated gene 204 [MGI:96429]                             |
| 20 | Irf7       | 104,744,836,673,836  | 2.33E+00             | interferon regulatory factor 7 [MGI:1859212]                          |

| No | GeneSymbol | log2FoldChange      | pvalue               | Description                                                                              |
|----|------------|---------------------|----------------------|------------------------------------------------------------------------------------------|
| 21 | Ifi205     | 104,860,323,791,077 | 0.000175037308649503 | interferon activated gene 205 [MGI:101847]                                               |
| 22 | Cd59b      | 105,788,880,034,178 | 7.10E+09             | CD59b antigen [MGI:1888996]                                                              |
| 23 | Tlr8       | 106,872,911,519,219 | 7.26E+00             | toll-like receptor 8 [MGI:2176887]                                                       |
| 24 | Cd209g     | 107,464,930,628,652 | 0.0269895576128606   | CD209g antigen [MGI:1917442]                                                             |
| 25 | Cd300ld5   | 107,464,930,628,652 | 5.99E+09             | CD300 molecule like family member D5 [MGI:3702661]                                       |
| 26 | Cxcl2      | 107,464,930,628,652 | 1.16E-38             | chemokine (C-X-C motif) ligand 2 [MGI:1340094]                                           |
| 27 | Ifi44l     | 107,464,930,628,652 | 1.63E+02             | interferon-induced protein 44 like [MGI:95975]                                           |
| 28 | Il1rap1l   | 107,464,930,628,652 | 2.09E+05             | interleukin 1 receptor accessory protein-like 1 [MGI:2687319]                            |
| 29 | Il1Ira2    | 107,464,930,628,652 | 0.000492740545165748 | interleukin 11 receptor%2C alpha chain 2 [MGI:109123]                                    |
| 30 | Tnfsf4     | 107,464,930,628,652 | 0.000435017875268627 | tumor necrosis factor (ligand) superfamily%2C member 4 [MGI:104511]                      |
| 31 | Tnfaip6    | 107,464,930,628,652 | 0.000928373184333609 | tumor necrosis factor alpha induced protein 6 [MGI:1195266]                              |
| 32 | Il12b      | 107,665,581,283,575 | 0.00874689609902386  | interleukin 12b [MGI:96540]                                                              |
| 33 | Ccl8       | 108,005,364,655,727 | 2.58E-03             | chemokine (C-C motif) ligand 8 [MGI:101878]                                              |
| 34 | Tlr6       | 110,473,157,865,015 | 9.46E+09             | toll-like receptor 6 [MGI:1341296]                                                       |
| 35 | Tnfrsf23   | 111,507,117,297,136 | 1.08E+00             | tumor necrosis factor receptor superfamily%2C member 23 [MGI:1930269]                    |
| 36 | Tnfsf13os  | 113,219,294,110,661 | 0.0156911201266431   | tumor necrosis factor (ligand) superfamily%2C member 13%2C opposite strand [MGI:1919587] |
| 37 | Tlr13      | 115,547,341,421,694 | 1.05E+08             | toll-like receptor 13 [MGI:3045213]                                                      |
| 38 | Cd300e     | 116,142,686,461,352 | 0.00272713485805022  | CD300E molecule [MGI:2387602]                                                            |
| 39 | Ifi44      | 116,621,788,027,778 | 3.52E+04             | interferon-induced protein 44 [MGI:2443016]                                              |
| 40 | Ifit1bl1   | 118,674,903,809,899 | 2.95E+08             | interferon induced protein with tetratricopeptide repeats 1B like 1 [MGI:3650685]        |
| 41 | Ifit2      | 118,785,956,463,145 | 8.70E+05             | interferon-induced protein with tetratricopeptide repeats 2 [MGI:99449]                  |
| 42 | Il9r       | 119,277,456,645,938 | 3.43E+09             | interleukin 9 receptor [MGI:96564]                                                       |
| 43 | Ifit1      | 120,926,818,238,388 | 4.45E+00             | interferon-induced protein with tetratricopeptide repeats 1 [MGI:99450]                  |
| 44 | Il18bp     | 121,778,142,923,443 | 0.0321899239374584   | interleukin 18 binding protein [MGI:1333800]                                             |
| 45 | Ifi211     | 122,826,655,903,682 | 7.81E+07             | interferon activated gene 211 [MGI:3041120]                                              |
| 46 | Ifi202b    | 124,045,377,940,071 | 2.90E+04             | interferon activated gene 202B [MGI:1347083]                                             |
| 47 | Ifi2712b   | 125,657,187,311,355 | 0.000103171301877075 | interferon%2C alpha-inducible protein 27 like 2B [MGI:1916390]                           |
| 48 | Ifit3      | 130,305,503,452,759 | 0.0025536018126923   | interferon-induced protein with tetratricopeptide repeats 3 [MGI:1101055]                |
| 49 | Cxcl9      | 131,528,690,326,603 | 2.36E+08             | chemokine (C-X-C motif) ligand 9 [MGI:1352449]                                           |
| 50 | Il22ra2    | 154,359,794,387,995 | 0.0162435650732066   | interleukin 22 receptor%2C alpha 2 [MGI:2665114]                                         |
| 51 | Il12rb2    | 175,400,760,761,824 | 1.04E-06             | interleukin 12 receptor%2C beta 2 [MGI:1270861]                                          |
| 52 | Cd207      | 178,061,945,229,975 | 5.13E+04             | CD207 antigen [MGI:2180021]                                                              |
| 53 | Il10       | 183,995,911,848,254 | 1.15E+03             | interleukin 10 [MGI:96537]                                                               |
| 54 | Cxcl3      | 187,324,215,869,305 | 7.61E+01             | chemokine (C-X-C motif) ligand 3 [MGI:3037818]                                           |
| 55 | Tnip3      | 187,434,628,829,558 | 1.65E-08             | TNFAIP3 interacting protein 3 [MGI:3041165]                                              |
| 56 | Cd200r2    | 191,817,943,613,238 | 2.84E+06             | Cd200 receptor 2 [MGI:3042847]                                                           |
| 57 | Il4i1      | 191,817,943,613,238 | 0.000237475369019883 | interleukin 4 induced 1 [MGI:109552]                                                     |
| 58 | Cd14       | 202,641,041,714,651 | 9.37E+02             | CD14 antigen [MGI:88318]                                                                 |
| 59 | Cd1d2      | 203,405,396,653,538 | 0.00832009748099911  | CD1d2 antigen [MGI:107675]                                                               |
| 60 | Il1rn      | 209,036,679,328,658 | 5.41E+08             | interleukin 1 receptor antagonist [MGI:96547]                                            |

| No  | GeneSymbol | log2FoldChange       | pvalue              | Description                                                                                        |
|-----|------------|----------------------|---------------------|----------------------------------------------------------------------------------------------------|
| 61  | Il12rb1    | 214,328,629,045,949  | 1.67E+08            | interleukin 12 receptor%2C beta 1 [MGI:104579]                                                     |
| 62  | Cxcl17     | 230,065,376,966,381  | 1.37E+09            | chemokine (C-X-C motif) ligand 17 [MGI:2387642]                                                    |
| 63  | Ifnk       | 234,286,306,906,596  | 0.142881181304276   | interferon kappa [MGI:2683287]                                                                     |
| 64  | Ifitm7     | 240,523,715,532,405  | 0.548094718159512   | interferon induced transmembrane protein 7 [MGI:1921732]                                           |
| 65  | Il11       | 263,539,363,972,229  | 0.174428187317255   | interleukin 11 [MGI:107613]                                                                        |
| 66  | Cd163      | 307,964,851,730,233  | 0.00964409848365247 | CD163 antigen [MGI:2135946]                                                                        |
| 67  | Ccl28      | 326,910,508,634,092  | 0.0496813409682616  | chemokine (C-C motif) ligand 28 [MGI:1861731]                                                      |
| 68  | Cd200r4    | 461,113,034,685,918  | 0.240453497829044   | CD200 receptor 4 [MGI:3036289]                                                                     |
| 69  | Il33       | -0.00629978217500211 | 0.98504438453074    | interleukin 33 [MGI:1924375]                                                                       |
| 70  | Tnfsfm13   | -0.00817466906482611 | 0.988667066927702   | tumor necrosis factor (ligand) superfamily%2C membrane-bound member 13 [MGI:3845075]               |
| 71  | Cxcl1      | -0.0101554945241577  | 0.989573811348828   | chemokine (C-X-C motif) ligand 1 [MGI:108068]                                                      |
| 72  | Tnfaip3    | -0.0111577725280029  | 0.977192867233086   | tumor necrosis factor%2C alpha-induced protein 3 [MGI:1196377]                                     |
| 73  | Cd300lg    | -0.0118514882372231  | 0.970836545715984   | CD300 molecule like family member G [MGI:1289168]                                                  |
| 74  | Cd302      | -0.01607928149697    | 0.960766500470576   | CD302 antigen [MGI:1913455]                                                                        |
| 75  | Il1rl1     | -0.0259767909914303  | 0.978500089981421   | interleukin 1 receptor-like 1 [MGI:98427]                                                          |
| 76  | Tnfsf10    | -0.0261895437367237  | 0.976031676986724   | tumor necrosis factor (ligand) superfamily%2C member 10 [MGI:107414]                               |
| 77  | Ticam1     | -0.0263610353273369  | 0.914689065062169   | toll-like receptor adaptor molecule 1 [MGI:2147032]                                                |
| 78  | Ifitm1     | -0.0288819832140512  | 0.940062709520083   | interferon induced transmembrane protein 1 [MGI:1915963]                                           |
| 79  | Tnfsf14    | -0.0337413602636778  | 0.961448746796842   | tumor necrosis factor (ligand) superfamily%2C member 14 [MGI:1355317]                              |
| 80  | Cd3eap     | -0.0383274668362301  | 0.921617383746341   | CD3E antigen%2C epsilon polypeptide associated protein [MGI:1917583]                               |
| 81  | Cd2ap      | -0.0412113202325419  | 0.803756408069128   | CD2-associated protein [MGI:1330281]                                                               |
| 82  | Ifnar1     | -0.0430406375104941  | 0.843152982599429   | interferon (alpha and beta) receptor 1 [MGI:107658]                                                |
| 83  | Tnfsf12    | -0.0535444291910669  | 0.876817496308514   | tumor necrosis factor (ligand) superfamily%2C member 12 [MGI:1196259]                              |
| 84  | Cd164l2    | -0.0542948347698559  | 0.95137127972888    | CD164 sialomucin-like 2 [MGI:1916905]                                                              |
| 85  | Il17d      | -0.0548734726565384  | 0.966331398846415   | interleukin 17D [MGI:2446510]                                                                      |
| 86  | Cd27       | -0.0552832870879904  | 0.909922328300242   | CD27 antigen [MGI:88326]                                                                           |
| 87  | Tnfrsf14   | -0.0597458637482882  | 0.921080600125657   | tumor necrosis factor receptor superfamily%2C member 14 (herpesvirus entry mediator) [MGI:2675303] |
| 88  | Cd200      | -0.065888620135081   | 0.826380971074643   | CD200 antigen [MGI:1196990]                                                                        |
| 89  | Ilf2       | -0.0733800908605041  | 0.758028519621434   | interleukin enhancer binding factor 2 [MGI:1915031]                                                |
| 90  | Il12a      | -0.0753512095241331  | 0.938950560888775   | interleukin 12a [MGI:96539]                                                                        |
| 91  | Traf6      | -0.0776167517949854  | 0.731896982421353   | TNF receptor-associated factor 6 [MGI:108072]                                                      |
| 92  | Cd53       | -0.0793009041862201  | 0.834350886548877   | CD53 antigen [MGI:88341]                                                                           |
| 93  | Cd8b1      | -0.0797416789623197  | 0.872423932430793   | CD8 antigen%2C beta chain 1 [MGI:88347]                                                            |
| 94  | Cd209b     | -0.0867055620553623  | 0.919186918714411   | CD209b antigen [MGI:1916415]                                                                       |
| 95  | Cd9        | -0.0918105137012682  | 0.654062630876517   | CD9 antigen [MGI:88348]                                                                            |
| 96  | Ilf3       | -0.0946682120382127  | 0.688968896484248   | interleukin enhancer binding factor 3 [MGI:1339973]                                                |
| 97  | Il1r1      | -0.0986314902781243  | 0.815269532352998   | interleukin 1 receptor%2C type I [MGI:96545]                                                       |
| 98  | Tnf        | -0.104494758922266   | 0.923921886421324   | tumor necrosis factor [MGI:104798]                                                                 |
| 99  | Cd2        | -0.106099528538717   | 0.785411977014756   | CD2 antigen [MGI:88320]                                                                            |
| 100 | Ccl5       | -0.109828757602888   | 0.763232761224308   | chemokine (C-C motif) ligand 5 [MGI:98262]                                                         |



| No  | GeneSymbol | log2FoldChange     | pvalue            | Description                                                                       |
|-----|------------|--------------------|-------------------|-----------------------------------------------------------------------------------|
| 101 | Cd80       | -0.115464530700793 | 0.89085285016756  | CD80 antigen [MGI:101775]                                                         |
| 102 | Cd40       | -0.116641048703766 | 0.798681060916854 | CD40 antigen [MGI:88336]                                                          |
| 103 | Ifi213     | -0.11690609119356  | 0.93929241234457  | interferon activated gene 213 [MGI:3695276]                                       |
| 104 | Tnip2      | -0.117534016031347 | 0.770990485076895 | TNFAIP3 interacting protein 2 [MGI:2386643]                                       |
| 105 | Il10rb     | -0.127766273894928 | 0.598902819763916 | interleukin 10 receptor%2C beta [MGI:109380]                                      |
| 106 | Irf2bp1    | -0.139019441355806 | 0.527555105504382 | interferon regulatory factor 2 binding protein 1 [MGI:2442159]                    |
| 107 | Cx3cl1     | -0.146769626344419 | 0.570606646114902 | chemokine (C-X3-C motif) ligand 1 [MGI:1097153]                                   |
| 108 | Il7r       | -0.150698958656173 | 0.73780887368926  | interleukin 7 receptor [MGI:96562]                                                |
| 109 | Ccr7       | -0.15458459142029  | 0.696742247954295 | chemokine (C-C motif) receptor 7 [MGI:103011]                                     |
| 110 | Il6ra      | -0.155144881866079 | 0.612522966622691 | interleukin 6 receptor%2C alpha [MGI:105304]                                      |
| 111 | Cxcl12     | -0.169257367339871 | 0.444737856745629 | chemokine (C-X-C motif) ligand 12 [MGI:103556]                                    |
| 112 | Cd28       | -0.181079619401626 | 0.660039181370002 | CD28 antigen [MGI:88327]                                                          |
| 113 | Il22ra1    | -0.183574474778835 | 0.80153624581063  | interleukin 22 receptor%2C alpha 1 [MGI:2663588]                                  |
| 114 | Cd4        | -0.184882487189952 | 0.580026358786321 | CD4 antigen [MGI:88335]                                                           |
| 115 | Il21r      | -0.185138616008279 | 0.514824936335132 | interleukin 21 receptor [MGI:1890475]                                             |
| 116 | Ccl4       | -0.193564733552129 | 0.864906729727093 | chemokine (C-C motif) ligand 4 [MGI:98261]                                        |
| 117 | Il18r1     | -0.193914389550147 | 0.752024644594228 | interleukin 18 receptor 1 [MGI:105383]                                            |
| 118 | Ifngr1     | -0.196405638574333 | 0.543758858570337 | interferon gamma receptor 1 [MGI:107655]                                          |
| 119 | Cd3e       | -0.198202920139887 | 0.574126576200893 | CD3 antigen%2C epsilon polypeptide [MGI:88332]                                    |
| 120 | Cd226      | -0.213313460706133 | 0.65764349447032  | CD226 antigen [MGI:3039602]                                                       |
| 121 | Traf2      | -0.216777829319608 | 0.554901227358144 | TNF receptor-associated factor 2 [MGI:101835]                                     |
| 122 | Tnfsf13b   | -0.218013054064485 | 0.709049808140353 | tumor necrosis factor (ligand) superfamily%2C member 13b [MGI:1344376]            |
| 123 | Irf2bp2    | -0.221676408632738 | 0.369273312320874 | interferon regulatory factor 2 binding protein 2 [MGI:2443921]                    |
| 124 | Il6st      | -0.225478533735707 | 0.26329072231112  | interleukin 6 signal transducer [MGI:96560]                                       |
| 125 | Ccl3       | -0.236609322152507 | 0.885860916486732 | chemokine (C-C motif) ligand 3 [MGI:98260]                                        |
| 126 | Tnfsf9     | -0.238228621981986 | 0.80962490349036  | tumor necrosis factor (ligand) superfamily%2C member 9 [MGI:1101058]              |
| 127 | Cd55       | -0.239700983210784 | 0.467001666365307 | CD55 molecule%2C decay accelerating factor for complement [MGI:104850]            |
| 128 | Traf7      | -0.251513618682982 | 0.267574440875536 | TNF receptor-associated factor 7 [MGI:3042141]                                    |
| 129 | Cd8a       | -0.251592264980369 | 0.557701321712295 | CD8 antigen%2C alpha chain [MGI:88346]                                            |
| 130 | Il11ra1    | -0.260378755888444 | 0.2923129574363   | interleukin 11 receptor%2C alpha chain 1 [MGI:107426]                             |
| 131 | Ccr3       | -0.266581944608793 | 0.554873843850703 | chemokine (C-C motif) receptor 3 [MGI:104616]                                     |
| 132 | Tnfrsf4    | -0.271610994921636 | 0.744929477823971 | tumor necrosis factor receptor superfamily%2C member 4 [MGI:104512]               |
| 133 | Ifrd1      | -0.273821012558169 | 0.307265979624789 | interferon-related developmental regulator 1 [MGI:1316717]                        |
| 134 | Il27ra     | -0.285733043315535 | 0.543494146663859 | interleukin 27 receptor%2C alpha [MGI:1355318]                                    |
| 135 | Tnfrsf26   | -0.29497211485063  | 0.55224242338832  | tumor necrosis factor receptor superfamily%2C member 26 [MGI:2651928]             |
| 136 | Tirap      | -0.299711310248086 | 0.304476610288002 | toll-interleukin 1 receptor (TIR) domain-containing adaptor protein [MGI:2152213] |
| 137 | Il16       | -0.300053967192227 | 0.309236920571565 | interleukin 16 [MGI:1270855]                                                      |
| 138 | Iigp1      | -0.300555307508189 | 0.793968990591732 | interferon inducible GTPase 1 [MGI:1926259]                                       |
| 139 | Il1rap     | -0.303004158328193 | 0.158463453421858 | interleukin 1 receptor accessory protein [MGI:104975]                             |
| 140 | Cd40lg     | -0.310309212924606 | 0.718641149711387 | CD40 ligand [MGI:88337]                                                           |

| No  | GeneSymbol | log2FoldChange     | pvalue              | Description                                                                       |
|-----|------------|--------------------|---------------------|-----------------------------------------------------------------------------------|
| 141 | Cd37       | -0.317952925748662 | 0.0966132917842814  | CD37 antigen [MGI:88330]                                                          |
| 142 | Irf2bpl    | -0.324749578709531 | 0.0975055346157033  | interferon regulatory factor 2 binding protein-like [MGI:2442463]                 |
| 143 | Il18rap    | -0.354516213184245 | 0.469879643677596   | interleukin 18 receptor accessory protein [MGI:1338888]                           |
| 144 | Ifitm10    | -0.358972777745122 | 0.669985945727926   | interferon induced transmembrane protein 10 [MGI:2444776]                         |
| 145 | Tlr11      | -0.372743081176829 | 0.673967236319704   | toll-like receptor 11 [MGI:3045226]                                               |
| 146 | Traf3      | -0.373492275552831 | 0.186867031441345   | TNF receptor-associated factor 3 [MGI:108041]                                     |
| 147 | Cxcr5      | -0.375303014663837 | 0.259523145838491   | chemokine (C-X-C motif) receptor 5 [MGI:103567]                                   |
| 148 | Cd209f     | -0.381010630790393 | 0.861824245165159   | CD209f antigen [MGI:1916392]                                                      |
| 149 | Cd83       | -0.381760488880864 | 0.263611182572541   | CD83 antigen [MGI:1328316]                                                        |
| 150 | Tiaf2      | -0.386392983122796 | 0.876080302008762   | TGF-beta1-induced anti-apoptotic factor 2 [MGI:2651383]                           |
| 151 | Cd34       | -0.388622664167885 | 0.181069763661684   | CD34 antigen [MGI:88329]                                                          |
| 152 | Ccl11      | -0.411088143679874 | 0.75790833309848    | chemokine (C-C motif) ligand 11 [MGI:103576]                                      |
| 153 | Cxcr6      | -0.411135118697785 | 0.446433281145678   | chemokine (C-X-C motif) receptor 6 [MGI:1934582]                                  |
| 154 | Cd109      | -0.416598686364217 | 0.761056249986935   | CD109 antigen [MGI:2445221]                                                       |
| 155 | Ccl21a     | -0.41937661386809  | 0.215554397477196   | chemokine (C-C motif) ligand 21A (serine) [MGI:1349183]                           |
| 156 | Il2ra      | -0.428460914802252 | 0.39897735589167    | interleukin 2 receptor%2C alpha chain [MGI:96549]                                 |
| 157 | Il2rb      | -0.440182185458623 | 0.20095560648725    | interleukin 2 receptor%2C beta chain [MGI:96550]                                  |
| 158 | Cd3g       | -0.441203724847344 | 0.319106335107068   | CD3 antigen%2C gamma polypeptide [MGI:88333]                                      |
| 159 | Cd5        | -0.441779587288103 | 0.283587474672847   | CD5 antigen [MGI:88340]                                                           |
| 160 | Cd200r3    | -0.449047141257079 | 0.837717455079944   | CD200 receptor 3 [MGI:1921853]                                                    |
| 161 | Ccl6       | -0.453547332093083 | 0.56262185599468    | chemokine (C-C motif) ligand 6 [MGI:98263]                                        |
| 162 | Ccl25      | -0.457700226668724 | 0.357719413822164   | chemokine (C-C motif) ligand 25 [MGI:1099448]                                     |
| 163 | Cxcr3      | -0.462087798561092 | 0.344872466167229   | chemokine (C-X-C motif) receptor 3 [MGI:1277207]                                  |
| 164 | Cd248      | -0.470560836798528 | 0.267708532347523   | CD248 antigen%2C endosialin [MGI:1917695]                                         |
| 165 | Isg20l2    | -0.471818400009623 | 0.0633270412625933  | interferon stimulated exonuclease gene 20-like 2 [MGI:2140076]                    |
| 166 | Tnfrsf12a  | -0.519615000335774 | 0.11012196139068    | tumor necrosis factor receptor superfamily%2C member 12a [MGI:1351484]            |
| 167 | Cxcr4      | -0.555442237390704 | 0.17364542410023    | chemokine (C-X-C motif) receptor 4 [MGI:109563]                                   |
| 168 | Tnfrsf13b  | -0.558544783469858 | 0.0973502037842684  | tumor necrosis factor receptor superfamily%2C member 13b [MGI:1889411]            |
| 169 | Cd33       | -0.569275930699256 | 0.220090149317365   | CD33 antigen [MGI:99440]                                                          |
| 170 | Il31ra     | -0.575352703656152 | 0.816626339345224   | interleukin 31 receptor A [MGI:2180511]                                           |
| 171 | Irak1bp1   | -0.577622951133223 | 0.299484219963104   | interleukin-1 receptor-associated kinase 1 binding protein 1 [MGI:1929475]        |
| 172 | Ccl17      | -0.599634714933656 | 0.719733054708835   | chemokine (C-C motif) ligand 17 [MGI:1329039]                                     |
| 173 | Ifit1bl2   | -0.602571359173614 | 0.379204728456064   | interferon induced protein with tetratricopeptide repeats 1B like 2 [MGI:2148249] |
| 174 | Cd72       | -0.607496397043129 | 0.186155930976888   | CD72 antigen [MGI:88345]                                                          |
| 175 | Cd19       | -0.617819447152275 | 0.00599629604221468 | CD19 antigen [MGI:88319]                                                          |
| 176 | Tnfrsf10b  | -0.627869054217611 | 0.471692001992258   | tumor necrosis factor receptor superfamily%2C member 10b [MGI:1341090]            |
| 177 | Tnfsf11    | -0.629584202702985 | 0.82132178703679    | tumor necrosis factor (ligand) superfamily%2C member 11 [MGI:1100089]             |
| 178 | Cd79b      | -0.633370047990933 | 0.00403482152776518 | CD79B antigen [MGI:96431]                                                         |
| 179 | Cd79a      | -0.639689285205689 | 0.0129361315170776  | CD79A antigen (immunoglobulin-associated alpha) [MGI:101774]                      |
| 180 | Il20rb     | -0.655200241119215 | 0.79936626247078    | interleukin 20 receptor beta [MGI:2143266]                                        |

| No  | GeneSymbol | log2FoldChange       | pvalue              | Description                                                                             |
|-----|------------|----------------------|---------------------|-----------------------------------------------------------------------------------------|
| 181 | Tnfrsf18   | -0.670410054931381   | 0.264520681059559   | tumor necrosis factor receptor superfamily%2C member 18 [MGI:894675]                    |
| 182 | Cd6        | -0.677896022160922   | 0.119618547277613   | CD6 antigen [MGI:103566]                                                                |
| 183 | Il17rd     | -0.689325031153535   | 0.2216562956147     | interleukin 17 receptor D [MGI:2159727]                                                 |
| 184 | Cd244a     | -0.693255394507716   | 0.332538968020667   | CD244 molecule A [MGI:109294]                                                           |
| 185 | Cxcr1      | -0.717777590718248   | 0.835643719326519   | chemokine (C-X-C motif) receptor 1 [MGI:2448715]                                        |
| 186 | Tnfsf13    | -0.750761241816689   | 0.483120266240697   | tumor necrosis factor (ligand) superfamily%2C member 13 [MGI:1916833]                   |
| 187 | Cd177      | -0.755706956263262   | 0.501422566657761   | CD177 antigen [MGI:1916141]                                                             |
| 188 | Ccr4       | -0.760400798645006   | 0.610170021009188   | chemokine (C-C motif) receptor 4 [MGI:107824]                                           |
| 189 | Tnfrsf25   | -0.770035667917447   | 0.498586303303577   | tumor necrosis factor receptor superfamily%2C member 25 [MGI:1934667]                   |
| 190 | Cd22       | -0.80299811508737    | 0.00192984324178873 | CD22 antigen [MGI:88322]                                                                |
| 191 | Irf4       | -0.818149468017431   | 0.0548832319553881  | interferon regulatory factor 4 [MGI:1096873]                                            |
| 192 | Ccr8       | -0.848904045355965   | 0.835197262016943   | chemokine (C-C motif) receptor 8 [MGI:1201402]                                          |
| 193 | Ifitm5     | -0.848904045355965   | 0.835197262016943   | interferon induced transmembrane protein 5 [MGI:1934923]                                |
| 194 | Il13       | -0.848904045355965   | 0.835197262016943   | interleukin 13 [MGI:96541]                                                              |
| 195 | Il17b      | -0.848904045355965   | 0.835197262016943   | interleukin 17B [MGI:1928397]                                                           |
| 196 | Il2        | -0.848904045355965   | 0.835197262016943   | interleukin 2 [MGI:96548]                                                               |
| 197 | Il5        | -0.848904045355965   | 0.835197262016943   | interleukin 5 [MGI:96557]                                                               |
| 198 | Ccl12      | -0.886304743586552   | 0.701328271597135   | chemokine (C-C motif) ligand 12 [MGI:108224]                                            |
| 199 | Tnfrsf13c  | -0.913002998914999   | 0.00120791088078383 | tumor necrosis factor receptor superfamily%2C member 13c [MGI:1919299]                  |
| 200 | Ccr10      | -0.930154799719504   | 0.514402775698829   | chemokine (C-C motif) receptor 10 [MGI:1096320]                                         |
| 201 | Tnfrsf11b  | 0.000802633292793072 | 0.998975007130411   | tumor necrosis factor receptor superfamily%2C member 11b (osteoprotegerin) [MGI:109587] |
| 202 | Traf4      | 0.00272390597007002  | 0.990206336811233   | TNF receptor associated factor 4 [MGI:1202880]                                          |
| 203 | Cd2bp2     | 0.00902630035334023  | 0.965500254590719   | CD2 cytoplasmic tail binding protein 2 [MGI:1917483]                                    |
| 204 | Il7        | 0.0103847352566463   | 0.983568281409114   | interleukin 7 [MGI:96561]                                                               |
| 205 | Ifitm6     | 0.0141311816504759   | 0.990339661483158   | interferon induced transmembrane protein 6 [MGI:2686976]                                |
| 206 | Xcl1       | 0.0166752888139125   | 0.986900150094642   | chemokine (C motif) ligand 1 [MGI:104593]                                               |
| 207 | Cd1d1      | 0.0276119446964711   | 0.925870679472257   | CD1d1 antigen [MGI:107674]                                                              |
| 208 | Il4ra      | 0.029325264385659    | 0.932426353923256   | interleukin 4 receptor%2C alpha [MGI:105367]                                            |
| 209 | Il13ra1    | 0.0300082427467002   | 0.892392664563753   | interleukin 13 receptor%2C alpha 1 [MGI:105052]                                         |
| 210 | Il34       | 0.0477939724934537   | 0.929612934941804   | interleukin 34 [MGI:1923777]                                                            |
| 211 | Ccl19-ps3  | 0.0517073980438877   | 0.980024802672649   | chemokine (C-C motif) ligand 19%2C pseudogene 3 [MGI:1891391]                           |
| 212 | Il17rb     | 0.0562227150820265   | 0.883310367582693   | interleukin 17 receptor B [MGI:1355292]                                                 |
| 213 | Cd99l2     | 0.0571697896829738   | 0.81458434545839    | CD99 antigen-like 2 [MGI:2177151]                                                       |
| 214 | Ifi209     | 0.0599248792133154   | 0.890312973442159   | interferon activated gene 209 [MGI:2138243]                                             |
| 215 | Ifrd2      | 0.0633501278668049   | 0.751943143061282   | interferon-related developmental regulator 2 [MGI:1316708]                              |
| 216 | Cd48       | 0.0683313994499046   | 0.876091784312326   | CD48 antigen [MGI:88339]                                                                |
| 217 | Trap1      | 0.0752175181443699   | 0.743427003428461   | TNF receptor-associated protein 1 [MGI:1915265]                                         |
| 218 | Ccl9       | 0.0769120897199726   | 0.908971634892831   | chemokine (C-C motif) ligand 9 [MGI:104533]                                             |
| 219 | Tab2       | 0.0816244837997741   | 0.698629652952474   | TGF-beta activated kinase 1/MAP3K7 binding protein 2 [MGI:1915902]                      |
| 220 | Ifngr2     | 0.0851409421457327   | 0.750790863833649   | interferon gamma receptor 2 [MGI:107654]                                                |

| No  | GeneSymbol | log2FoldChange     | pvalue            | Description                                                                 |
|-----|------------|--------------------|-------------------|-----------------------------------------------------------------------------|
| 221 | Cd93       | 0.085634716256371  | 0.766264610631491 | CD93 antigen [MGI:106664]                                                   |
| 222 | Cd151      | 0.0865241826873063 | 0.716203908729262 | CD151 antigen [MGI:1096360]                                                 |
| 223 | Igtp       | 0.0896739291158092 | 0.937755718583517 | interferon gamma induced GTPase [MGI:107729]                                |
| 224 | Ccr9       | 0.0898644755541599 | 0.899368707108787 | chemokine (C-C motif) receptor 9 [MGI:1341902]                              |
| 225 | Traf1      | 0.100856137121042  | 0.79848052646407  | TNF receptor-associated factor 1 [MGI:101836]                               |
| 226 | Cd84       | 0.100934837750633  | 0.79596790587658  | CD84 antigen [MGI:1336885]                                                  |
| 227 | Ccl7       | 0.102090312951765  | 0.964631123985084 | chemokine (C-C motif) ligand 7 [MGI:99512]                                  |
| 228 | Irf2       | 0.102552929990441  | 0.691409428110806 | interferon regulatory factor 2 [MGI:96591]                                  |
| 229 | Cx3cr1     | 0.10332451694409   | 0.818039254968363 | chemokine (C-X3-C motif) receptor 1 [MGI:1333815]                           |
| 230 | Cd160      | 0.10960089576852   | 0.882427050741873 | CD160 antigen [MGI:1860383]                                                 |
| 231 | Il36rn     | 0.112876634072893  | 0.977931224692451 | interleukin 36 receptor antagonist [MGI:1859325]                            |
| 232 | Cd300ld3   | 0.112878262750551  | 0.97660107865223  | CD300 molecule like family member D3 [MGI:2687214]                          |
| 233 | Tnfrsf1a   | 0.116723847768239  | 0.74342544794756  | tumor necrosis factor receptor superfamily%2C member 1a [MGI:1314884]       |
| 234 | Il1a       | 0.117805051344263  | 0.866397425373629 | interleukin 1 alpha [MGI:96542]                                             |
| 235 | Cd3d       | 0.120795502009835  | 0.773819073612692 | CD3 antigen%2C delta polypeptide [MGI:88331]                                |
| 236 | Tnfaip8l3  | 0.122576261057012  | 0.89261038081675  | tumor necrosis factor%2C alpha-induced protein 8-like 3 [MGI:2685363]       |
| 237 | Il3ra      | 0.122590295542371  | 0.879609953477968 | interleukin 3 receptor%2C alpha chain [MGI:96553]                           |
| 238 | Il17f      | 0.127855608042669  | 0.938479415877557 | interleukin 17F [MGI:2676631]                                               |
| 239 | Cd276      | 0.135270626878699  | 0.828498035501174 | CD276 antigen [MGI:2183926]                                                 |
| 240 | Il17ra     | 0.138675576678205  | 0.528666703444255 | interleukin 17 receptor A [MGI:107399]                                      |
| 241 | Traf5      | 0.143390992000718  | 0.638316894216117 | TNF receptor-associated factor 5 [MGI:107548]                               |
| 242 | Cd81       | 0.147056312965707  | 0.464755279192465 | CD81 antigen [MGI:1096398]                                                  |
| 243 | Cd274      | 0.156104468095294  | 0.881066111960396 | CD274 antigen [MGI:1926446]                                                 |
| 244 | Tnfaip1    | 0.156554791797204  | 0.429996250419903 | tumor necrosis factor%2C alpha-induced protein 1 (endothelial) [MGI:104961] |
| 245 | Tlr4       | 0.162468415300973  | 0.777790292125042 | toll-like receptor 4 [MGI:96824]                                            |
| 246 | Irf8       | 0.16466024390241   | 0.65648878133411  | interferon regulatory factor 8 [MGI:96395]                                  |
| 247 | Il1r2      | 0.172262609245514  | 0.940386773467695 | interleukin 1 receptor%2C type II [MGI:96546]                               |
| 248 | Cd59a      | 0.174613612950286  | 0.512909021318775 | CD59a antigen [MGI:109177]                                                  |
| 249 | Irf5       | 0.176899673050131  | 0.657070595475548 | interferon regulatory factor 5 [MGI:1350924]                                |
| 250 | Cd63       | 0.179593833594399  | 0.641752325580921 | CD63 antigen [MGI:99529]                                                    |
| 251 | Il17re     | 0.179622436452869  | 0.725585149737307 | interleukin 17 receptor E [MGI:1889371]                                     |
| 252 | Irf3       | 0.181633815616392  | 0.356323591579499 | interferon regulatory factor 3 [MGI:1859179]                                |
| 253 | Cd300c     | 0.18211226277832   | 0.913682227168607 | CD300C molecule [MGI:3032626]                                               |
| 254 | Cxcl14     | 0.187343389216895  | 0.613013703153836 | chemokine (C-X-C motif) ligand 14 [MGI:1888514]                             |
| 255 | Irak1      | 0.197352718873187  | 0.263943871849461 | interleukin-1 receptor-associated kinase 1 [MGI:107420]                     |
| 256 | Il27       | 0.20053187737198   | 0.865861003970836 | interleukin 27 [MGI:2384409]                                                |
| 257 | Irak2      | 0.201054394682217  | 0.346074600898307 | interleukin-1 receptor-associated kinase 2 [MGI:2429603]                    |
| 258 | Cd247      | 0.201772919812177  | 0.702730661934345 | CD247 antigen [MGI:88334]                                                   |
| 259 | Ccl27a     | 0.202987711765463  | 0.814466326321095 | chemokine (C-C motif) ligand 27A [MGI:1343459]                              |
| 260 | Tnfp1      | 0.211762723811261  | 0.49216665930079  | TNFAIP3 interacting protein 1 [MGI:1926194]                                 |

| No  | GeneSymbol | log2FoldChange    | pvalue             | Description                                                                            |
|-----|------------|-------------------|--------------------|----------------------------------------------------------------------------------------|
| 261 | Il17rc     | 0.214023146907419 | 0.593778977628006  | interleukin 17 receptor C [MGI:2159336]                                                |
| 262 | Ifi206     | 0.221291956196688 | 0.797940263969278  | interferon activated gene 206 [MGI:3646410]                                            |
| 263 | Ifi35      | 0.222629323220719 | 0.537964324884103  | interferon-induced protein 35 [MGI:1917360]                                            |
| 264 | Cd52       | 0.224169724482271 | 0.533577007451219  | CD52 antigen [MGI:1346088]                                                             |
| 265 | Ccl19      | 0.226289797518027 | 0.615970417495101  | chemokine (C-C motif) ligand 19 [MGI:1346316]                                          |
| 266 | Cd38       | 0.233475038529637 | 0.735403603440714  | CD38 antigen [MGI:107474]                                                              |
| 267 | Tradd      | 0.243827343155133 | 0.472108949518999  | TNFRSF1A-associated via death domain [MGI:109200]                                      |
| 268 | Cd320      | 0.245977215627021 | 0.358841135886861  | CD320 antigen [MGI:1860083]                                                            |
| 269 | Cd209d     | 0.253564423950459 | 0.816681674108299  | CD209d antigen [MGI:2157947]                                                           |
| 270 | Irf9       | 0.257131317958072 | 0.348308673354994  | interferon regulatory factor 9 [MGI:107587]                                            |
| 271 | Cd63-ps    | 0.268438759899135 | 0.493058643507591  | CD63 antigen%2C pseudogene [MGI:105972]                                                |
| 272 | Tlr1       | 0.270531034236844 | 0.521708351593235  | toll-like receptor 1 [MGI:1341295]                                                     |
| 273 | Tgif1      | 0.275465788655244 | 0.385777530434536  | TGFB-induced factor homeobox 1 [MGI:1194497]                                           |
| 274 | Il1rl2     | 0.287315044623065 | 0.748554368523409  | interleukin 1 receptor-like 2 [MGI:1913107]                                            |
| 275 | Tnfsf15    | 0.288442616996102 | 0.600263354214888  | tumor necrosis factor (ligand) superfamily%2C member 15 [MGI:2180140]                  |
| 276 | Cd164      | 0.294820233060877 | 0.168030926703047  | CD164 antigen [MGI:1859568]                                                            |
| 277 | Cd300a     | 0.295228256828646 | 0.744786873780108  | CD300A molecule [MGI:2443411]                                                          |
| 278 | Xcr1       | 0.302912320065715 | 0.49637127701386   | chemokine (C motif) receptor 1 [MGI:1346338]                                           |
| 279 | Cd300lf    | 0.303912028687229 | 0.672944847966544  | CD300 molecule like family member F [MGI:2442359]                                      |
| 280 | Irf6       | 0.30786588324277  | 0.336554777447571  | interferon regulatory factor 6 [MGI:1859211]                                           |
| 281 | Il18       | 0.308426789848844 | 0.442879500783312  | interleukin 18 [MGI:107936]                                                            |
| 282 | Tab1       | 0.314489943636019 | 0.342049951898743  | TGF-beta activated kinase 1/MAP3K7 binding protein 1 [MGI:1913763]                     |
| 283 | Tnfaip8    | 0.318142563355438 | 0.220496166843783  | tumor necrosis factor%2C alpha-induced protein 8 [MGI:2147191]                         |
| 284 | Il2rg      | 0.320772825055357 | 0.653378935880815  | interleukin 2 receptor%2C gamma chain [MGI:96551]                                      |
| 285 | Cd96       | 0.324294131046711 | 0.516505804886922  | CD96 antigen [MGI:1934368]                                                             |
| 286 | Cxcr2      | 0.331689121261392 | 0.781063175494958  | chemokine (C-X-C motif) receptor 2 [MGI:105303]                                        |
| 287 | Irf1       | 0.332762399835744 | 0.722540984389655  | interferon regulatory factor 1 [MGI:96590]                                             |
| 288 | Tnfrsf1b   | 0.336035411357627 | 0.668715671681376  | tumor necrosis factor receptor superfamily%2C member 1b [MGI:1314883]                  |
| 289 | Il10ra     | 0.340519186208458 | 0.453758710302376  | interleukin 10 receptor%2C alpha [MGI:96538]                                           |
| 290 | Cd44       | 0.346645047152503 | 0.637170633814673  | CD44 antigen [MGI:88338]                                                               |
| 291 | Tlr9       | 0.363934044859796 | 0.398623383530067  | toll-like receptor 9 [MGI:1932389]                                                     |
| 292 | Cd86       | 0.368105536038396 | 0.338605241888879  | CD86 antigen [MGI:101773]                                                              |
| 293 | Tnfrsf21   | 0.378292743046086 | 0.321126056475527  | tumor necrosis factor receptor superfamily%2C member 21 [MGI:2151075]                  |
| 294 | Irak4      | 0.381334123959383 | 0.348310861244116  | interleukin-1 receptor-associated kinase 4 [MGI:2182474]                               |
| 295 | Ifi2712a   | 0.383796779837755 | 0.281889939504822  | interferon%2C alpha-inducible protein 27 like 2A [MGI:1924183]                         |
| 296 | Cd82       | 0.384759910451096 | 0.0261674825873268 | CD82 antigen [MGI:104651]                                                              |
| 297 | Cd47       | 0.389338253217249 | 0.202535636559438  | CD47 antigen (Rh-related antigen%2C integrin-associated signal transducer) [MGI:96617] |
| 298 | Tab3       | 0.398676057065896 | 0.102163052491097  | TGF-beta activated kinase 1/MAP3K7 binding protein 3 [MGI:1913974]                     |
| 299 | Il36g      | 0.401039587209503 | 0.75883888167789   | interleukin 36G [MGI:2449929]                                                          |
| 300 | Ifi27      | 0.405622614918507 | 0.101056811882536  | interferon%2C alpha-inducible protein 27 [MGI:1277180]                                 |

| No  | GeneSymbol | log2FoldChange    | pvalue             | Description                                                                |
|-----|------------|-------------------|--------------------|----------------------------------------------------------------------------|
| 301 | Ifi208     | 0.411179904062548 | 0.452903087458228  | interferon activated gene 208 [MGI:2442822]                                |
| 302 | Ifitm2     | 0.413258970764261 | 0.236798201938217  | interferon induced transmembrane protein 2 [MGI:1933382]                   |
| 303 | Cxcl16     | 0.420833865268051 | 0.288701492750494  | chemokine (C-X-C motif) ligand 16 [MGI:1932682]                            |
| 304 | Tlr3       | 0.432754660864114 | 0.188463951398783  | toll-like receptor 3 [MGI:2156367]                                         |
| 305 | Tlr5       | 0.448073316977401 | 0.561855305277711  | toll-like receptor 5 [MGI:1858171]                                         |
| 306 | Cd46       | 0.453487307388179 | 0.615644555827261  | CD46 antigen%2C complement regulatory protein [MGI:1203290]                |
| 307 | Ifi30      | 0.465030309488951 | 0.271670925181171  | interferon gamma inducible protein 30 [MGI:2137648]                        |
| 308 | Ifnlr1     | 0.488921798662259 | 0.484704580963926  | interferon lambda receptor 1 [MGI:2429859]                                 |
| 309 | Cd7        | 0.505671576092954 | 0.395635652312737  | CD7 antigen [MGI:88344]                                                    |
| 310 | Cd101      | 0.534282023894083 | 0.720750854225281  | CD101 antigen [MGI:2685862]                                                |
| 311 | Cd55os     | 0.536788387756854 | 0.637597170333053  | CD55 molecule%2C opposite strand sequence [MGI:3783116]                    |
| 312 | Ifnar2     | 0.538558391634504 | 0.110129919283211  | interferon (alpha and beta) receptor 2 [MGI:1098243]                       |
| 313 | Il15ra     | 0.548386845898    | 0.0999837363410759 | interleukin 15 receptor%2C alpha chain [MGI:104644]                        |
| 314 | Cklf       | 0.548404322819854 | 0.266433467951957  | chemokine-like factor [MGI:1922708]                                        |
| 315 | Cxcl13     | 0.562048705749398 | 0.0725188915487971 | chemokine (C-X-C motif) ligand 13 [MGI:1888499]                            |
| 316 | Ifitm3     | 0.571341750517422 | 0.159972593435979  | interferon induced transmembrane protein 3 [MGI:1913391]                   |
| 317 | Ticam2     | 0.572049390810405 | 0.560190265757297  | toll-like receptor adaptor molecule 2 [MGI:3040056]                        |
| 318 | Il15       | 0.582757356460273 | 0.195581432573609  | interleukin 15 [MGI:103014]                                                |
| 319 | Ifi47      | 0.584967090192526 | 0.577613063771245  | interferon gamma inducible protein 47 [MGI:99448]                          |
| 320 | Cd300lb    | 0.585760687680359 | 0.451456524359781  | CD300 molecule like family member B [MGI:2685099]                          |
| 321 | Ifi203     | 0.589469501559503 | 0.033640040996126  | interferon activated gene 203 [MGI:96428]                                  |
| 322 | Cd24a      | 0.595494661440941 | 0.123032160175617  | CD24a antigen [MGI:88323]                                                  |
| 323 | Cd180      | 0.61290950320405  | 0.0759476007481163 | CD180 antigen [MGI:1194924]                                                |
| 324 | Cxcl5      | 0.62685079178505  | 0.601609740621458  | chemokine (C-X-C motif) ligand 5 [MGI:1096868]                             |
| 325 | Tnfrsf22   | 0.639831498742774 | 0.403911827832648  | tumor necrosis factor receptor superfamily%2C member 22 [MGI:1930270]      |
| 326 | Cd200r1    | 0.642960795315042 | 0.422457000481489  | CD200 receptor 1 [MGI:1889024]                                             |
| 327 | Cxcl10     | 0.66050248011595  | 0.474458043468451  | chemokine (C-X-C motif) ligand 10 [MGI:1352450]                            |
| 328 | Ifih1      | 0.664031570289563 | 0.32247451960126   | interferon induced with helicase C domain 1 [MGI:1918836]                  |
| 329 | Tlr7       | 0.672649820578578 | 0.0882243701935452 | toll-like receptor 7 [MGI:2176882]                                         |
| 330 | Ccr1       | 0.679579322234964 | 0.365082108987487  | chemokine (C-C motif) receptor 1 [MGI:104618]                              |
| 331 | Tlr12      | 0.695080083221509 | 0.610482009387906  | toll-like receptor 12 [MGI:3045221]                                        |
| 332 | Cd300c2    | 0.703524259197462 | 0.15718719306917   | CD300C molecule 2 [MGI:2153249]                                            |
| 333 | Ccr12      | 0.710603156943402 | 0.215251562334509  | chemokine (C-C motif) receptor-like 2 [MGI:1920904]                        |
| 334 | Tnfaip8l2  | 0.711950936128224 | 0.194356611483864  | tumor necrosis factor%2C alpha-induced protein 8-like 2 [MGI:1917019]      |
| 335 | Ifi3b      | 0.713753425774395 | 0.104972636687951  | interferon-induced protein with tetratricopeptide repeats 3B [MGI:3698419] |
| 336 | Cd69       | 0.719788895059801 | 0.181781893206846  | CD69 antigen [MGI:88343]                                                   |
| 337 | Irak3      | 0.754542200926711 | 0.234802700954121  | interleukin-1 receptor-associated kinase 3 [MGI:1921164]                   |
| 338 | Ifi207     | 0.757054880988353 | 0.382431314723057  | interferon activated gene 207 [MGI:2138302]                                |
| 339 | Ifng       | 0.758034795795177 | 0.48261726444794   | interferon gamma [MGI:107656]                                              |
| 340 | Ccl2       | 0.763785046508935 | 0.495336819864714  | chemokine (C-C motif) ligand 2 [MGI:98259]                                 |

| No  | GeneSymbol | log2FoldChange    | pvalue             | Description                                                                                                         |
|-----|------------|-------------------|--------------------|---------------------------------------------------------------------------------------------------------------------|
| 341 | Tnfaip8l1  | 0.768695123503555 | 0.106239354572966  | tumor necrosis factor%2C alpha-induced protein 8-like 1 [MGI:1913693]                                               |
| 342 | Ccr2       | 0.779159167227943 | 0.45385222359535   | chemokine (C-C motif) receptor 2 [MGI:106185]                                                                       |
| 343 | Cd300ld    | 0.783943906819671 | 0.434458130190962  | CD300 molecule like family member d [MGI:2442358]                                                                   |
| 344 | Cmklr1     | 0.789175435376237 | 0.429860406539231  | chemokine-like receptor 1 [MGI:109603]                                                                              |
| 345 | Ccr5       | 0.800429275833292 | 0.484457485301858  | chemokine (C-C motif) receptor 5 [MGI:107182]                                                                       |
| 346 | Tnfrsf11a  | 0.820343175539459 | 0.162248683478097  | tumor necrosis factor receptor superfamily%2C member 11a%2C NFKB activator [MGI:1314891]                            |
| 347 | Il17c      | 0.828129553116289 | 0.73032221610689   | interleukin 17C [MGI:2446486]                                                                                       |
| 348 | Il1b       | 0.856356691151241 | 0.275681105723864  | interleukin 1 beta [MGI:96543]                                                                                      |
| 349 | Cd36       | 0.87942269789016  | 0.0257300903251748 | CD36 molecule [MGI:107899]                                                                                          |
| 350 | Cd68       | 0.883532975068716 | 0.336474036004727  | CD68 antigen [MGI:88342]                                                                                            |
| 351 | Ifi214     | 0.887011548556684 | 0.0795267973564031 | interferon activated gene 214 [MGI:3584522]                                                                         |
| 352 | Isg20      | 0.899666330216774 | 0.265962566090453  | interferon-stimulated protein [MGI:1928895]                                                                         |
| 353 | Cd5l       | 0.905620291997585 | 0.369006153767789  | CD5 antigen-like [MGI:1334419]                                                                                      |
| 354 | Il5ra      | 0.909102572568407 | 0.268445651035497  | interleukin 5 receptor%2C alpha [MGI:96558]                                                                         |
| 355 | Cd74       | 0.918500035775561 | 0.158876511577439  | CD74 antigen (invariant polypeptide of major histocompatibility complex%2C class II antigen-associated) [MGI:96534] |
| 356 | Cxcl11     | 0.940810683059146 | 0.23535517564965   | chemokine (C-X-C motif) ligand 11 [MGI:1860203]                                                                     |
| 357 | Il6        | 0.960223709160506 | 0.776054687822267  | interleukin 6 [MGI:96559]                                                                                           |
| 358 | Tnfrsf17   | 0.971245430086521 | 0.555356586893095  | tumor necrosis factor receptor superfamily%2C member 17 [MGI:1343050]                                               |
| 359 | Ifi203-ps  | 0.98578251218713  | 0.105448014095494  | interferon activated gene 203%2C pseudogene [MGI:3840117]                                                           |
| 360 | Cd209c     | NA                | NA                 | CD209c antigen [MGI:2157945]                                                                                        |
| 361 | Cd300ld2   | NA                | NA                 | CD300 molecule like family member D2 [MGI:3649405]                                                                  |
| 362 | Cd55b      | NA                | NA                 | CD55 molecule%2C decay accelerating factor for complement B [MGI:104849]                                            |
| 363 | Cd70       | NA                | NA                 | CD70 antigen [MGI:1195273]                                                                                          |
| 364 | Cd9-ps     | NA                | NA                 | Cd9 antigen%2C pseudogene [MGI:3645134]                                                                             |
| 365 | Ccl1       | NA                | NA                 | chemokine (C-C motif) ligand 1 [MGI:98258]                                                                          |
| 366 | Ccl19-ps1  | NA                | NA                 | chemokine (C-C motif) ligand 19%2C pseudogene 1 [MGI:1891387]                                                       |
| 367 | Ccl20      | NA                | NA                 | chemokine (C-C motif) ligand 20 [MGI:1329031]                                                                       |
| 368 | Ccl21b     | NA                | NA                 | chemokine (C-C motif) ligand 21B (leucine) [MGI:1349182]                                                            |
| 369 | Ccl21d     | NA                | NA                 | chemokine (C-C motif) ligand 21D [MGI:5434896]                                                                      |
| 370 | Ccl26      | NA                | NA                 | chemokine (C-C motif) ligand 26 [MGI:3589281]                                                                       |
| 371 | Ccl27b     | NA                | NA                 | chemokine (C-C motif) ligand 27b [MGI:1891389]                                                                      |
| 372 | Cxcl15     | NA                | NA                 | chemokine (C-X-C motif) ligand 15 [MGI:1339941]                                                                     |
| 373 | Ifna1      | NA                | NA                 | interferon alpha 1 [MGI:107668]                                                                                     |
| 374 | Ifna11     | NA                | NA                 | interferon alpha 11 [MGI:109210]                                                                                    |
| 375 | Ifna12     | NA                | NA                 | interferon alpha 12 [MGI:2676324]                                                                                   |
| 376 | Ifna13     | NA                | NA                 | interferon alpha 13 [MGI:2667155]                                                                                   |
| 377 | Ifna14     | NA                | NA                 | interferon alpha 14 [MGI:3641425]                                                                                   |
| 378 | Ifna15     | NA                | NA                 | interferon alpha 15 [MGI:3649418]                                                                                   |
| 379 | Ifna16     | NA                | NA                 | interferon alpha 16 [MGI:3649260]                                                                                   |
| 380 | Ifna2      | NA                | NA                 | interferon alpha 2 [MGI:107666]                                                                                     |

| No  | GeneSymbol | log2FoldChange | pvalue | Description                                                           |
|-----|------------|----------------|--------|-----------------------------------------------------------------------|
| 381 | Ifna4      | NA             | NA     | interferon alpha 4 [MGI:107664]                                       |
| 382 | Ifna5      | NA             | NA     | interferon alpha 5 [MGI:107663]                                       |
| 383 | Ifna6      | NA             | NA     | interferon alpha 6 [MGI:107662]                                       |
| 384 | Ifna7      | NA             | NA     | interferon alpha 7 [MGI:107661]                                       |
| 385 | Ifna9      | NA             | NA     | interferon alpha 9 [MGI:107659]                                       |
| 386 | Ifnab      | NA             | NA     | interferon alpha B [MGI:1097683]                                      |
| 387 | Ifna-ps1   | NA             | NA     | interferon alpha gene%2C pseudogene 1 [MGI:107669]                    |
| 388 | Ifnb1      | NA             | NA     | interferon beta 1%2C fibroblast [MGI:107657]                          |
| 389 | Ifne       | NA             | NA     | interferon epsilon [MGI:2667156]                                      |
| 390 | Ifnl2      | NA             | NA     | interferon lambda 2 [MGI:3647279]                                     |
| 391 | Ifnl3      | NA             | NA     | interferon lambda 3 [MGI:2450574]                                     |
| 392 | Ifnz       | NA             | NA     | interferon zeta [MGI:2448469]                                         |
| 393 | Il1bos     | NA             | NA     | interleukin 1 beta%2C opposite strand [MGI:3650458]                   |
| 394 | Il1f10     | NA             | NA     | interleukin 1 family%2C member 10 [MGI:2652548]                       |
| 395 | Il1rapl2   | NA             | NA     | interleukin 1 receptor accessory protein-like 2 [MGI:1913106]         |
| 396 | Il17a      | NA             | NA     | interleukin 17A [MGI:107364]                                          |
| 397 | Il19       | NA             | NA     | interleukin 19 [MGI:1890472]                                          |
| 398 | Il20       | NA             | NA     | interleukin 20 [MGI:1890473]                                          |
| 399 | Il20ra     | NA             | NA     | interleukin 20 receptor%2C alpha [MGI:3605069]                        |
| 400 | Il22       | NA             | NA     | interleukin 22 [MGI:1355307]                                          |
| 401 | Il22b      | NA             | NA     | interleukin 22B [MGI:2151139]                                         |
| 402 | Il23a      | NA             | NA     | interleukin 23%2C alpha subunit p19 [MGI:1932410]                     |
| 403 | Il24       | NA             | NA     | interleukin 24 [MGI:2135548]                                          |
| 404 | Il25       | NA             | NA     | interleukin 25 [MGI:2155888]                                          |
| 405 | Il3        | NA             | NA     | interleukin 3 [MGI:96552]                                             |
| 406 | Il31       | NA             | NA     | interleukin 31 [MGI:1923649]                                          |
| 407 | Il36a      | NA             | NA     | interleukin 36A [MGI:1859324]                                         |
| 408 | Il36b      | NA             | NA     | interleukin 36B [MGI:1916927]                                         |
| 409 | Il9        | NA             | NA     | interleukin 9 [MGI:96563]                                             |
| 410 | Tgif1-ps   | NA             | NA     | TGFB-induced factor homeobox 1%2C pseudogene [MGI:3779880]            |
| 411 | Tgif2      | NA             | NA     | TGFB-induced factor homeobox 2 [MGI:1915299]                          |
| 412 | Tgif2lx1   | NA             | NA     | TGFB-induced factor homeobox 2-like%2C X-linked 1 [MGI:2387796]       |
| 413 | Tgif2lx2   | NA             | NA     | TGFB-induced factor homeobox 2-like%2C X-linked 2 [MGI:3800824]       |
| 414 | Tgif2-ps1  | NA             | NA     | TGFB-induced factor homeobox 2%2C pseudogene 1 [MGI:3649223]          |
| 415 | Tnfsf18    | NA             | NA     | tumor necrosis factor (ligand) superfamily%2C member 18 [MGI:2673064] |
