# Supplementary material for: Identification of immune-associated genes with altered expression in the spleen of mice enriched with probiotic Lactobacillus species using RNA-seq profiling
Source: PubMed Central journal article supplement (PMC11725755; doi:10.5713/ab.24.0280), 2024-08-26
Supplement: ab-24-0280-Supplementary-Table-4.pdf [file ab-24-0280-Supplementary-Table-4.pdf]

## Supplementary Table S4A

| Ali g | Sublis t | Ca t | Term                                                                    | Fol d | P- Value | Coun t |
|-------|----------|------|-------------------------------------------------------------------------|-------|----------|--------|
| 1     | 1        | BP   | cell cycle                                                              | 5.5   | 9.4E-46  | 101    |
| 2     | 2        | BP   | cell division                                                           | 5.9   | 1.1E-31  | 67     |
| 3     | 3        | BP   | DNA replication                                                         | 8.7   | 2.1E-18  | 29     |
| 4     | 4        | BP   | chromosome segregation                                                  | 8.7   | 3.9E-17  | 27     |
| 5     | 5        | BP   | chemokine-mediated signaling pathway                                    | 12.3  | 2.9E-14  | 18     |
| 6     | 6        | BP   | immune response                                                         | 3.6   | 6.0E-14  | 48     |
| 7     | 7        | BP   | DNA replication initiation                                              | 18.5  | 8.0E-13  | 13     |
| 8     | 8        | BP   | inflammatory response                                                   | 3.7   | 1.1E-12  | 42     |
| 9     | 9        | BP   | mitotic spindle organization                                            | 11.2  | 5.5E-12  | 16     |
| 10    | 10       | BP   | mitotic sister chromatid segregation                                    | 15.4  | 1.2E-11  | 13     |
| 11    | 11       | BP   | mitotic cell cycle                                                      | 6.6   | 1.4E-11  | 22     |
| 12    | 12       | BP   | porphyrin-containing compound biosynthetic process                      | 25.4  | 1.8E-11  | 10     |
| 13    | 13       | BP   | chemotaxis                                                              | 6.0   | 3.7E-11  | 23     |
| 14    | 14       | BP   | chromosome condensation                                                 | 16.4  | 4.1E-11  | 12     |
| 15    | 15       | BP   | erythrocyte development                                                 | 14.0  | 4.4E-11  | 13     |
| 16    | 16       | BP   | neutrophil chemotaxis                                                   | 7.4   | 9.1E-10  | 17     |
| 17    | 17       | BP   | positive regulation of chromosome segregation                           | 22.9  | 9.5E-10  | 9      |
| 18    | 18       | BP   | mitotic cytokinesis                                                     | 8.7   | 1.1E-9   | 15     |
| 19    | 19       | BP   | cellular response to ionizing radiation                                 | 9.4   | 1.8E-9   | 14     |
| 20    | 20       | BP   | heme b biosynthetic process                                             | 31.1  | 1.3E-8   | 7      |
| 21    | 21       | BP   | positive regulation of chromosome condensation                          | 31.1  | 1.3E-8   | 7      |
| 22    | 22       | BP   | mitotic spindle midzone assembly                                        | 27.7  | 3.7E-8   | 7      |
| 23    | 23       | BP   | heme O biosynthetic process                                             | 27.7  | 3.7E-8   | 7      |
| 24    | 24       | BP   | mitotic chromosome condensation                                         | 20.3  | 3.8E-8   | 8      |
| 25    | 25       | BP   | DNA unwinding involved in DNA replication                               | 15.2  | 5.4E-8   | 9      |
| 26    | 26       | BP   | negative regulation of viral genome replication                         | 8.0   | 5.9E-8   | 13     |
| 27    | 27       | BP   | heme biosynthetic process                                               | 14.5  | 8.3E-8   | 9      |
| 28    | 28       | BP   | heme a biosynthetic process                                             | 24.9  | 9.1E-8   | 7      |
| 29    | 29       | BP   | protoporphyrinogen IX biosynthetic process                              | 24.9  | 9.1E-8   | 7      |
| 30    | 30       | BP   | positive regulation of chromosome separation                            | 22.6  | 2.0E-7   | 7      |
| 31    | 31       | BP   | erythrocyte differentiation                                             | 6.5   | 6.0E-7   | 13     |
| 32    | 32       | BP   | DNA repair                                                              | 2.8   | 8.9E-7   | 31     |
| 33    | 33       | BP   | cellular response to DNA damage stimulus                                | 2.5   | 1.3E-6   | 37     |
| 34    | 34       | BP   | positive regulation of T cell proliferation                             | 6.1   | 1.3E-6   | 13     |
| 35    | 35       | BP   | mitotic G2 DNA damage checkpoint                                        | 8.7   | 1.6E-6   | 10     |
| 36    | 36       | BP   | attachment of mitotic spindle microtubules to kinetochore               | 16.6  | 1.9E-6   | 7      |
| 37    | 37       | BP   | DNA duplex unwinding                                                    | 9.7   | 2.7E-6   | 9      |
| 38    | 38       | BP   | regulation of cyclin-dependent protein serine/threonine kinase activity | 9.7   | 2.7E-6   | 9      |
| 39    | 39       | BP   | spindle assembly involved in female meiosis I                           | 35.6  | 3.0E-6   | 5      |
| 40    | 40       | BP   | kinetochore organization                                                | 35.6  | 3.0E-6   | 5      |
| 41    | 41       | BP   | calcium-mediated signaling                                              | 4.9   | 5.0E-6   | 14     |
| 42    | 42       | BP   | monocyte chemotaxis                                                     | 8.7   | 6.9E-6   | 9      |
| 43    | 43       | BP   | microtubule-based movement                                              | 5.6   | 8.5E-6   | 12     |
| 44    | 44       | BP   | premeiotic DNA replication                                              | 29.6  | 8.8E-6   | 5      |
| 45    | 45       | BP   | meiotic chromosome segregation                                          | 29.6  | 8.8E-6   | 5      |
| 46    | 46       | BP   | double-strand break repair via break-induced replication                | 17.8  | 1.2E-5   | 6      |
| 47    | 47       | BP   | positive regulation of mitotic cell cycle spindle assembly checkpoint   | 17.8  | 1.2E-5   | 6      |
| 48    | 48       | BP   | lymphocyte chemotaxis                                                   | 9.5   | 1.5E-5   | 8      |
| 49    | 49       | BP   | positive regulation of interferon-gamma production                      | 4.8   | 1.6E-5   | 13     |
| 50    | 50       | BP   | cellular response to interleukin-1                                      | 5.3   | 1.6E-5   | 12     |
| 51    | 51       | BP   | meiotic chromosome condensation                                         | 25.4  | 2.0E-5   | 5      |
| 52    | 52       | BP   | cellular response to lipopolysaccharide                                 | 2.7   | 2.7E-5   | 24     |
| 53    | 53       | BP   | mitotic spindle assembly checkpoint                                     | 8.6   | 3.0E-5   | 8      |
| 54    | 54       | BP   | defense response to virus                                               | 3.0   | 3.1E-5   | 21     |
| 55    | 55       | BP   | negative regulation of cysteine-type endopeptidase activity             | 12.6  | 8.0E-5   | 6      |
| 56    | 56       | BP   | positive regulation of mitotic sister chromatid separation              | 35.6  | 8.6E-5   | 4      |
| 57    | 57       | BP   | acute-phase response                                                    | 7.3   | 9.3E-5   | 8      |
| 58    | 58       | BP   | immune system process                                                   | 2.1   | 9.7E-5   | 33     |

| Ali g | Sublis t | Ca t | Term                                                                                      | Fol d | P- Value | Coun t |
|-------|----------|------|-------------------------------------------------------------------------------------------|-------|----------|--------|
| 59    | 59       | BP   | positive regulation of mitotic cell cycle                                                 | 7.1   | 1.1E-4   | 8      |
| 60    | 60       | BP   | G2/M transition of mitotic cell cycle                                                     | 6.9   | 1.3E-4   | 8      |
| 61    | 61       | BP   | protein localization to CENP-A containing chromatin                                       | 11.2  | 1.4E-4   | 6      |
| 62    | 62       | BP   | replication fork processing                                                               | 6.8   | 1.5E-4   | 8      |
| 63    | 63       | BP   | intrinsic apoptotic signaling pathway by p53 class mediator                               | 6.8   | 1.5E-4   | 8      |
| 64    | 64       | BP   | mitotic metaphase plate congression                                                       | 6.8   | 1.5E-4   | 8      |
| 65    | 65       | BP   | positive regulation of G2/M transition of mitotic cell cycle                              | 8.3   | 1.6E-4   | 7      |
| 66    | 66       | BP   | monocyte differentiation                                                                  | 8.3   | 1.6E-4   | 7      |
| 67    | 67       | BP   | positive regulation of interleukin-1 beta production                                      | 5.0   | 1.6E-4   | 10     |
| 68    | 68       | BP   | cytokine-mediated signaling pathway                                                       | 3.4   | 1.6E-4   | 15     |
| 69    | 69       | BP   | mitotic DNA replication checkpoint                                                        | 16.2  | 1.7E-4   | 5      |
| 70    | 70       | BP   | eosinophil chemotaxis                                                                     | 10.7  | 1.9E-4   | 6      |
| 71    | 71       | BP   | nucleosome assembly                                                                       | 4.4   | 2.0E-4   | 11     |
| 72    | 72       | BP   | tetrapyrrole biosynthetic process                                                         | 28.4  | 2.1E-4   | 4      |
| 73    | 73       | BP   | positive regulation of cytokinesis                                                        | 6.3   | 2.4E-4   | 8      |
| 74    | 74       | BP   | kinetochore assembly                                                                      | 14.8  | 2.5E-4   | 5      |
| 75    | 75       | BP   | hemopoiesis                                                                               | 4.3   | 2.6E-4   | 11     |
| 76    | 76       | BP   | mitotic cell cycle phase transition                                                       | 9.7   | 3.0E-4   | 6      |
| 77    | 77       | BP   | positive regulation of mitotic cytokinesis                                                | 23.7  | 4.1E-4   | 4      |
| 78    | 78       | BP   | positive regulation of cell cycle G2/M phase transition                                   | 23.7  | 4.1E-4   | 4      |
| 79    | 79       | BP   | metaphase plate congression                                                               | 12.7  | 4.9E-4   | 5      |
| 80    | 80       | BP   | positive regulation of cell cycle                                                         | 5.6   | 5.2E-4   | 8      |
| 81    | 81       | BP   | activation of cysteine-type endopeptidase activity                                        | 8.5   | 5.7E-4   | 6      |
| 82    | 82       | BP   | liver regeneration                                                                        | 6.6   | 6.1E-4   | 7      |
| 83    | 83       | BP   | cellular response to interferon-gamma                                                     | 3.5   | 6.5E-4   | 12     |
| 84    | 84       | BP   | negative regulation of DNA binding                                                        | 6.1   | 9.3E-4   | 7      |
| 85    | 85       | BP   | positive regulation of erythrocyte differentiation                                        | 7.6   | 9.9E-4   | 6      |
| 86    | 86       | BP   | chromosome organization                                                                   | 5.0   | 1.0E-3   | 8      |
| 87    | 87       | BP   | positive regulation of attachment of mitotic spindle microtubules to kinetochore          | 17.8  | 1.1E-3   | 4      |
| 88    | 88       | BP   | cell chemotaxis                                                                           | 3.8   | 1.2E-3   | 10     |
| 89    | 89       | BP   | DNA recombination                                                                         | 3.8   | 1.2E-3   | 10     |
| 90    | 90       | BP   | attachment of spindle microtubules to kinetochore                                         | 9.9   | 1.4E-3   | 5      |
| 91    | 91       | BP   | negative regulation of DNA recombination                                                  | 9.9   | 1.4E-3   | 5      |
| 92    | 92       | BP   | double-strand break repair via homologous recombination                                   | 3.7   | 1.4E-3   | 10     |
| 93    | 93       | BP   | positive regulation of cytosolic calcium ion concentration                                | 2.8   | 1.5E-3   | 14     |
| 94    | 94       | BP   | positive regulation of ERK1 and ERK2 cascade                                              | 2.5   | 1.6E-3   | 17     |
| 95    | 95       | BP   | hydrogen peroxide catabolic process                                                       | 6.9   | 1.6E-3   | 6      |
| 96    | 96       | BP   | CENP-A containing nucleosome assembly                                                     | 15.8  | 1.6E-3   | 4      |
| 97    | 97       | BP   | spindle organization                                                                      | 9.4   | 1.7E-3   | 5      |
| 98    | 98       | BP   | multicellular organismal iron ion homeostasis                                             | 6.7   | 1.8E-3   | 6      |
| 99    | 99       | BP   | response to interferon-gamma                                                              | 6.5   | 2.1E-3   | 6      |
| 100   | 100      | BP   | response to platinum ion                                                                  | 35.6  | 2.3E-3   | 3      |
| 101   | 101      | BP   | heterochromatin organization                                                              | 5.1   | 2.4E-3   | 7      |
| 102   | 102      | BP   | G1/S transition of mitotic cell cycle                                                     | 4.3   | 2.5E-3   | 8      |
| 103   | 103      | BP   | negative regulation of gene expression, epigenetic                                        | 5.0   | 2.7E-3   | 7      |
| 104   | 104      | BP   | regulation of cell cycle                                                                  | 2.4   | 2.7E-3   | 16     |
| 105   | 105      | BP   | antimicrobial humoral immune response mediated by antimicrobial peptide                   | 2.9   | 2.9E-3   | 12     |
| 106   | 106      | BP   | response to stilbenoid                                                                    | 8.1   | 3.0E-3   | 5      |
| 107   | 107      | BP   | positive regulation of ubiquitin protein ligase activity                                  | 12.9  | 3.1E-3   | 4      |
| 108   | 108      | BP   | positive regulation of interleukin-4 production                                           | 4.8   | 3.2E-3   | 7      |
| 109   | 109      | BP   | regulation of mitotic cell cycle                                                          | 4.8   | 3.2E-3   | 7      |
| 110   | 110      | BP   | innate immune response                                                                    | 1.8   | 3.4E-3   | 27     |
| 111   | 111      | BP   | embryonic hemopoiesis                                                                     | 7.7   | 3.6E-3   | 5      |
| 112   | 112      | BP   | negative regulation of innate immune response                                             | 4.7   | 3.6E-3   | 7      |
| 113   | 113      | BP   | activation of innate immune response                                                      | 4.6   | 3.9E-3   | 7      |
| 114   | 114      | BP   | protein localization to kinetochore                                                       | 11.9  | 4.0E-3   | 4      |
| 115   | 115      | BP   | negative regulation of cysteine-type endopeptidase activity involved in apoptotic process | 4.5   | 4.3E-3   | 7      |
| 116   | 116      | BP   | regulation of cytokinesis                                                                 | 5.5   | 4.5E-3   | 6      |
| 117   | 117      | BP   | protoporphyrinogen IX metabolic process                                                   | 26.7  | 4.5E-3   | 3      |
| 118   | 118      | BP   | double-strand break repair                                                                | 3.8   | 4.7E-3   | 8      |
| 119   | 119      | BP   | cellular oxidant detoxification                                                           | 7.1   | 4.9E-3   | 5      |
| 120   | 120      | BP   | T cell costimulation                                                                      | 7.1   | 4.9E-3   | 5      |

| Ali g | Sublis t | Ca t | Term                                                                              | Fol d | P- Value | Coun t |
|-------|----------|------|-----------------------------------------------------------------------------------|-------|----------|--------|
| 121   | 121      | BP   | nucleotide biosynthetic process                                                   | 10.9  | 5.1E-3   | 4      |
| 122   | 122      | BP   | interferon-gamma production                                                       | 5.2   | 5.6E-3   | 6      |
| 123   | 123      | BP   | activation of protein kinase activity                                             | 6.6   | 6.5E-3   | 5      |
| 124   | 124      | BP   | negative regulation of interferon-gamma production                                | 5.0   | 6.8E-3   | 6      |
| 125   | 125      | BP   | DNA-dependent DNA replication                                                     | 6.4   | 7.4E-3   | 5      |
| 126   | 126      | BP   | positive regulation of hemoglobin biosynthetic process                            | 21.3  | 7.4E-3   | 3      |
| 127   | 127      | BP   | positive regulation of natural killer cell chemotaxis                             | 21.3  | 7.4E-3   | 3      |
| 128   | 128      | BP   | regulation of chemokine production                                                | 21.3  | 7.4E-3   | 3      |
| 129   | 129      | BP   | centrosome cycle                                                                  | 4.8   | 7.5E-3   | 6      |
| 130   | 130      | BP   | interspecies interaction between organisms                                        | 9.5   | 7.8E-3   | 4      |
| 131   | 131      | BP   | positive regulation of cytokine production                                        | 3.4   | 9.3E-3   | 8      |
| 132   | 132      | BP   | response to copper ion                                                            | 8.9   | 9.4E-3   | 4      |
| 133   | 133      | BP   | regulation of DNA damage checkpoint                                               | 8.9   | 9.4E-3   | 4      |
| 134   | 134      | BP   | cellular response to xenobiotic stimulus                                          | 3.3   | 9.9E-3   | 8      |
| 135   | 135      | BP   | response to gamma radiation                                                       | 5.7   | 1.1E-2   | 5      |
| 136   | 136      | BP   | homologous chromosome segregation                                                 | 17.8  | 1.1E-2   | 3      |
| 137   | 137      | BP   | DNA replication-dependent nucleosome assembly                                     | 17.8  | 1.1E-2   | 3      |
| 138   | 138      | BP   | cytokinesis                                                                       | 17.8  | 1.1E-2   | 3      |
| 139   | 139      | BP   | regulation of DNA-dependent DNA replication initiation                            | 17.8  | 1.1E-2   | 3      |
| 140   | 140      | BP   | centrosome duplication                                                            | 8.4   | 1.1E-2   | 4      |
| 141   | 141      | BP   | negative regulation of extrinsic apoptotic signaling pathway in absence of ligand | 5.6   | 1.2E-2   | 5      |
| 142   | 142      | BP   | negative regulation of myoblast differentiation                                   | 5.6   | 1.2E-2   | 5      |
| 143   | 143      | BP   | cellular response to interferon-beta                                              | 3.6   | 1.3E-2   | 7      |
| 144   | 144      | BP   | regulation of double-strand break repair via homologous recombination             | 7.9   | 1.3E-2   | 4      |
| 145   | 145      | BP   | defense response                                                                  | 2.7   | 1.3E-2   | 10     |
| 146   | 146      | BP   | positive regulation of interleukin-6 production                                   | 2.8   | 1.4E-2   | 9      |
| 147   | 147      | BP   | response to lipopolysaccharide                                                    | 2.3   | 1.5E-2   | 12     |
| 148   | 148      | BP   | negative regulation of cytokinesis                                                | 15.2  | 1.5E-2   | 3      |
| 149   | 149      | BP   | positive regulation of fever generation                                           | 15.2  | 1.5E-2   | 3      |
| 150   | 150      | BP   | positive regulation of cell-cell adhesion mediated by integrin                    | 15.2  | 1.5E-2   | 3      |
| 151   | 151      | BP   | immunoglobulin mediated immune response                                           | 2.2   | 1.5E-2   | 13     |
| 152   | 152      | BP   | positive regulation of T cell cytokine production                                 | 7.5   | 1.5E-2   | 4      |
| 153   | 153      | BP   | negative regulation of cell proliferation                                         | 1.8   | 1.6E-2   | 20     |
| 154   | 154      | BP   | base-excision repair                                                              | 5.1   | 1.6E-2   | 5      |
| 155   | 155      | BP   | positive regulation of release of sequestered calcium ion into cytosol            | 5.1   | 1.6E-2   | 5      |
| 156   | 156      | BP   | T cell receptor signaling pathway                                                 | 2.7   | 1.7E-2   | 9      |
| 157   | 157      | BP   | actin filament capping                                                            | 7.1   | 1.8E-2   | 4      |
| 158   | 158      | BP   | regulation of mitotic spindle organization                                        | 7.1   | 1.8E-2   | 4      |
| 159   | 159      | BP   | protein polyubiquitination                                                        | 2.4   | 1.8E-2   | 11     |
| 160   | 160      | BP   | platelet aggregation                                                              | 4.9   | 1.8E-2   | 5      |
| 161   | 161      | BP   | positive regulation of DNA replication                                            | 4.8   | 2.0E-2   | 5      |
| 162   | 162      | BP   | positive regulation of osteoclast differentiation                                 | 4.8   | 2.0E-2   | 5      |
| 163   | 163      | BP   | positive regulation of alpha-beta T cell proliferation                            | 13.3  | 2.0E-2   | 3      |
| 164   | 164      | BP   | porphyrin-containing compound metabolic process                                   | 13.3  | 2.0E-2   | 3      |
| 165   | 165      | BP   | positive regulation of G0 to G1 transition                                        | 13.3  | 2.0E-2   | 3      |
| 166   | 166      | BP   | TRIF-dependent toll-like receptor signaling pathway                               | 13.3  | 2.0E-2   | 3      |
| 167   | 167      | BP   | positive regulation of spindle assembly                                           | 13.3  | 2.0E-2   | 3      |
| 168   | 168      | BP   | positive regulation of immunoglobulin production                                  | 3.8   | 2.0E-2   | 6      |
| 169   | 169      | BP   | macromolecular complex assembly                                                   | 2.6   | 2.1E-2   | 9      |
| 170   | 170      | BP   | cellular response to glucose starvation                                           | 3.2   | 2.2E-2   | 7      |
| 171   | 171      | BP   | response to virus                                                                 | 2.8   | 2.3E-2   | 8      |
| 172   | 172      | BP   | positive regulation of exit from mitosis                                          | 11.9  | 2.5E-2   | 3      |
| 173   | 173      | BP   | DNA replication checkpoint                                                        | 11.9  | 2.5E-2   | 3      |
| 174   | 174      | BP   | cellular response to tumor necrosis factor                                        | 2.4   | 2.5E-2   | 10     |
| 175   | 175      | BP   | positive regulation of T cell activation                                          | 4.4   | 2.5E-2   | 5      |
| 176   | 176      | BP   | positive regulation of T cell migration                                           | 6.2   | 2.6E-2   | 4      |
| 177   | 177      | BP   | response to cytokine                                                              | 3.1   | 2.6E-2   | 7      |
| 178   | 178      | BP   | positive regulation of interleukin-2 production                                   | 4.3   | 2.7E-2   | 5      |
| 179   | 179      | BP   | adaptive immune response                                                          | 1.8   | 2.8E-2   | 16     |
| 180   | 180      | BP   | killing of cells of other organism                                                | 3.0   | 2.9E-2   | 7      |
| 181   | 181      | BP   | chromosome organization involved in meiotic cell cycle                            | 10.7  | 3.0E-2   | 3      |
| 182   | 182      | BP   | positive regulation of memory T cell activation                                   | 10.7  | 3.0E-2   | 3      |
| 183   | 183      | BP   | response to molecule of bacterial origin                                          | 10.7  | 3.0E-2   | 3      |

| Ali g | Sublis t | Ca t | Term                                                                                    | Fol d | P- Value | Coun t |
|-------|----------|------|-----------------------------------------------------------------------------------------|-------|----------|--------|
| 184   | 184      | BP   | response to bacterium                                                                   | 1.9   | 3.1E-2   | 15     |
| 185   | 185      | BP   | phospholipid biosynthetic process                                                       | 3.4   | 3.2E-2   | 6      |
| 186   | 186      | BP   | regulation of DNA replication                                                           | 4.0   | 3.4E-2   | 5      |
| 187   | 187      | BP   | mitotic spindle assembly                                                                | 4.0   | 3.4E-2   | 5      |
| 188   | 188      | BP   | protein ubiquitination                                                                  | 1.6   | 3.5E-2   | 21     |
| 189   | 189      | BP   | positive regulation of interleukin-17 production                                        | 5.5   | 3.5E-2   | 4      |
| 190   | 190      | BP   | positive regulation of mitotic metaphase/anaphase transition                            | 9.7   | 3.7E-2   | 3      |
| 191   | 191      | BP   | megakaryocyte differentiation                                                           | 9.7   | 3.7E-2   | 3      |
| 192   | 192      | BP   | positive regulation of interleukin-10 production                                        | 4.0   | 3.7E-2   | 5      |
| 193   | 193      | BP   | DNA biosynthetic process                                                                | 5.3   | 3.9E-2   | 4      |
| 194   | 194      | BP   | DNA damage checkpoint                                                                   | 3.9   | 4.0E-2   | 5      |
| 195   | 195      | BP   | positive regulation of G1/S transition of mitotic cell cycle                            | 3.8   | 4.2E-2   | 5      |
| 196   | 196      | BP   | negative regulation of transcription, DNA-templated                                     | 1.5   | 4.3E-2   | 28     |
| 197   | 197      | BP   | positive regulation of monocyte chemotaxis                                              | 5.1   | 4.3E-2   | 4      |
| 198   | 198      | BP   | positive regulation of CD4-positive, alpha-beta T cell proliferation                    | 8.9   | 4.3E-2   | 3      |
| 199   | 199      | BP   | positive regulation of glial cell proliferation                                         | 4.9   | 4.7E-2   | 4      |
| 200   | 200      | BP   | negative regulation of extrinsic apoptotic signaling pathway via death domain receptors | 4.9   | 4.7E-2   | 4      |
| 201   | 201      | BP   | positive regulation of wound healing                                                    | 4.9   | 4.7E-2   | 4      |
| 202   | 202      | BP   | positive regulation of GTPase activity                                                  | 2.1   | 4.8E-2   | 10     |
| 203   | 203      | BP   | positive regulation of B cell proliferation                                             | 3.6   | 4.8E-2   | 5      |
| 204   | 1        | CC   | chromosome                                                                              | 3.8   | 8.2E-19  | 61     |
| 205   | 2        | CC   | chromosome, centromeric region                                                          | 7.2   | 3.3E-17  | 31     |
| 206   | 3        | CC   | external side of plasma membrane                                                        | 3.4   | 8.9E-14  | 51     |
| 207   | 4        | CC   | kinetochore                                                                             | 5.8   | 3.2E-12  | 26     |
| 208   | 5        | CC   | mitotic spindle                                                                         | 6.1   | 8.5E-11  | 22     |
| 209   | 6        | CC   | condensed chromosome outer kinetochore                                                  | 23.9  | 6.7E-10  | 9      |
| 210   | 7        | CC   | nucleus                                                                                 | 1.4   | 1.6E-9   | 241    |
| 211   | 8        | CC   | condensin complex                                                                       | 32.5  | 9.8E-9   | 7      |
| 212   | 9        | CC   | nucleoplasm                                                                             | 1.5   | 1.7E-8   | 149    |
| 213   | 10       | CC   | condensed chromosome, centromeric region                                                | 15.2  | 5.9E-8   | 9      |
| 214   | 11       | CC   | condensed chromosome                                                                    | 10.2  | 7.4E-8   | 11     |
| 215   | 12       | CC   | spindle pole                                                                            | 5.1   | 9.5E-8   | 18     |
| 216   | 13       | CC   | centrosome                                                                              | 2.5   | 1.0E-7   | 43     |
| 217   | 14       | CC   | cytoskeleton                                                                            | 1.9   | 1.5E-7   | 73     |
| 218   | 15       | CC   | CENP-A containing nucleosome                                                            | 12.0  | 5.0E-7   | 9      |
| 219   | 16       | CC   | microtubule                                                                             | 3.0   | 7.2E-7   | 29     |
| 220   | 17       | CC   | cytoplasm                                                                               | 1.3   | 8.4E-7   | 253    |
| 221   | 18       | CC   | nucleosome                                                                              | 4.3   | 8.9E-7   | 18     |
| 222   | 19       | CC   | extracellular space                                                                     | 1.7   | 8.9E-7   | 89     |
| 223   | 20       | CC   | condensed nuclear chromosome                                                            | 7.4   | 1.8E-6   | 11     |
| 224   | 21       | CC   | nuclear chromosome                                                                      | 11.9  | 3.1E-6   | 8      |
| 225   | 22       | CC   | spindle                                                                                 | 4.3   | 5.1E-6   | 16     |
| 226   | 23       | CC   | CMG complex                                                                             | 20.3  | 5.5E-6   | 6      |
| 227   | 24       | CC   | chromatin                                                                               | 2.5   | 6.6E-6   | 32     |
| 228   | 25       | CC   | spindle midzone                                                                         | 10.6  | 7.0E-6   | 8      |
| 229   | 26       | CC   | microtubule cytoskeleton                                                                | 3.4   | 7.3E-6   | 20     |
| 230   | 27       | CC   | chromosome passenger complex                                                            | 31.0  | 7.4E-6   | 5      |
| 231   | 28       | CC   | spindle microtubule                                                                     | 8.6   | 7.6E-6   | 9      |
| 232   | 29       | CC   | midbody                                                                                 | 3.4   | 7.8E-6   | 20     |
| 233   | 30       | CC   | cortical cytoskeleton                                                                   | 9.0   | 2.3E-5   | 8      |
| 234   | 31       | CC   | cytosol                                                                                 | 1.3   | 3.3E-5   | 156    |
| 235   | 32       | CC   | mitotic spindle midzone                                                                 | 14.9  | 3.3E-5   | 6      |
| 236   | 33       | CC   | kinesin complex                                                                         | 7.0   | 3.8E-5   | 9      |
| 237   | 34       | CC   | intercellular bridge                                                                    | 4.3   | 1.0E-4   | 12     |
| 238   | 35       | CC   | MCM complex                                                                             | 16.9  | 1.5E-4   | 5      |
| 239   | 36       | CC   | replication fork                                                                        | 8.4   | 1.5E-4   | 7      |
| 240   | 37       | CC   | cell surface                                                                            | 1.9   | 2.6E-4   | 40     |
| 241   | 38       | CC   | hemoglobin complex                                                                      | 14.3  | 3.0E-4   | 5      |
| 242   | 39       | CC   | cyclin-dependent protein kinase holoenzyme complex                                      | 7.2   | 3.6E-4   | 7      |
| 243   | 40       | CC   | spectrin-associated cytoskeleton                                                        | 24.8  | 3.6E-4   | 4      |
| 244   | 41       | CC   | haptoglobin-hemoglobin complex                                                          | 13.3  | 4.2E-4   | 5      |
| 245   | 42       | CC   | chromocenter                                                                            | 12.4  | 5.5E-4   | 5      |
| 246   | 43       | CC   | nuclear ubiquitin ligase complex                                                        | 21.2  | 6.2E-4   | 4      |

| Ali g | Sublis t | Ca t | Term                                                                | Fol d | P- Value | Coun t |
|-------|----------|------|---------------------------------------------------------------------|-------|----------|--------|
| 247   | 44       | CC   | mitotic spindle pole                                                | 6.3   | 7.4E-4   | 7      |
| 248   | 45       | CC   | extracellular region                                                | 1.5   | 9.6E-4   | 74     |
| 249   | 46       | CC   | condensed chromosome inner kinetochore                              | 9.8   | 1.4E-3   | 5      |
| 250   | 47       | CC   | lateral element                                                     | 9.3   | 1.8E-3   | 5      |
| 251   | 48       | CC   | macromolecular complex                                              | 1.6   | 3.5E-3   | 41     |
| 252   | 49       | CC   | Rb-E2F complex                                                      | 22.3  | 6.8E-3   | 3      |
| 253   | 50       | CC   | pronucleus                                                          | 9.9   | 6.9E-3   | 4      |
| 254   | 51       | CC   | high-density lipoprotein particle                                   | 6.2   | 8.1E-3   | 5      |
| 255   | 52       | CC   | chromosome, telomeric region                                        | 2.9   | 8.5E-3   | 10     |
| 256   | 53       | CC   | male germ cell nucleus                                              | 3.4   | 9.5E-3   | 8      |
| 257   | 54       | CC   | spindle pole centrosome                                             | 7.4   | 1.6E-2   | 4      |
| 258   | 55       | CC   | intracellular membrane-bounded organelle                            | 1.4   | 1.8E-2   | 42     |
| 259   | 56       | CC   | nuclear origin of replication recognition complex                   | 13.9  | 1.8E-2   | 3      |
| 260   | 57       | CC   | XY body                                                             | 6.2   | 2.6E-2   | 4      |
| 261   | 58       | CC   | RNA polymerase II transcription factor complex                      | 2.5   | 2.7E-2   | 9      |
| 262   | 59       | CC   | centriole                                                           | 2.3   | 3.3E-2   | 10     |
| 263   | 60       | CC   | transcription factor complex                                        | 1.9   | 3.4E-2   | 15     |
| 264   | 61       | CC   | protein phosphatase type 1 complex                                  | 8.6   | 4.6E-2   | 3      |
| 265   | 1        | MF   | microtubule binding                                                 | 4.1   | 6.4E-11  | 32     |
| 266   | 2        | MF   | chemokine activity                                                  | 10.1  | 1.2E-10  | 15     |
| 267   | 3        | MF   | cytokine activity                                                   | 4.2   | 3.4E-10  | 29     |
| 268   | 4        | MF   | structural constituent of chromatin                                 | 5.7   | 4.8E-9   | 19     |
| 269   | 5        | MF   | microtubule motor activity                                          | 7.9   | 2.3E-7   | 12     |
| 270   | 6        | MF   | single-stranded DNA-dependent ATP-dependent DNA helicase activity   | 13.1  | 1.4E-6   | 8      |
| 271   | 7        | MF   | nucleotide binding                                                  | 1.7   | 1.6E-6   | 85     |
| 272   | 8        | MF   | ATPase activity                                                     | 2.7   | 1.6E-6   | 32     |
| 273   | 9        | MF   | anaphase-promoting complex binding                                  | 20.7  | 4.5E-6   | 6      |
| 274   | 10       | MF   | nucleosomal DNA binding                                             | 6.4   | 6.8E-6   | 11     |
| 275   | 11       | MF   | single-stranded DNA binding                                         | 4.4   | 1.8E-5   | 14     |
| 276   | 12       | MF   | ATP binding                                                         | 1.7   | 1.9E-5   | 74     |
| 277   | 13       | MF   | CXCR chemokine receptor binding                                     | 15.9  | 2.1E-5   | 6      |
| 278   | 14       | MF   | CCR chemokine receptor binding                                      | 8.9   | 2.4E-5   | 8      |
| 279   | 15       | MF   | double-stranded DNA binding                                         | 3.4   | 4.6E-5   | 17     |
| 280   | 16       | MF   | DNA replication origin binding                                      | 13.8  | 4.8E-5   | 6      |
| 281   | 17       | MF   | C-C chemokine binding                                               | 10.0  | 5.0E-5   | 7      |
| 282   | 18       | MF   | DNA binding                                                         | 1.5   | 5.1E-5   | 84     |
| 283   | 19       | MF   | identical protein binding                                           | 1.5   | 1.1E-4   | 88     |
| 284   | 20       | MF   | heme binding                                                        | 3.0   | 1.6E-4   | 17     |
| 285   | 21       | MF   | peroxidase activity                                                 | 6.6   | 1.9E-4   | 8      |
| 286   | 22       | MF   | cyclin-dependent protein serine/threonine kinase regulator activity | 7.3   | 3.3E-4   | 7      |
| 287   | 23       | MF   | haptoglobin binding                                                 | 13.2  | 4.1E-4   | 5      |
| 288   | 24       | MF   | cytokine receptor activity                                          | 5.6   | 5.0E-4   | 8      |
| 289   | 25       | MF   | C-C chemokine receptor activity                                     | 8.3   | 6.6E-4   | 6      |
| 290   | 26       | MF   | ATP-dependent microtubule motor activity, plus-end-directed         | 11.5  | 7.4E-4   | 5      |
| 291   | 27       | MF   | oxygen binding                                                      | 7.9   | 8.0E-4   | 6      |
| 292   | 28       | MF   | oxygen transporter activity                                         | 10.8  | 9.6E-4   | 5      |
| 293   | 29       | MF   | core promoter proximal region sequence-specific DNA binding         | 3.7   | 1.5E-3   | 10     |
| 294   | 30       | MF   | coreceptor activity                                                 | 5.2   | 2.0E-3   | 7      |
| 295   | 31       | MF   | protein kinase binding                                              | 1.8   | 2.8E-3   | 30     |
| 296   | 32       | MF   | chemokine receptor activity                                         | 8.2   | 2.8E-3   | 5      |
| 297   | 33       | MF   | DNA helicase activity                                               | 5.7   | 3.6E-3   | 6      |
| 298   | 34       | MF   | histone binding                                                     | 2.6   | 4.3E-3   | 13     |
| 299   | 35       | MF   | protein homodimerization activity                                   | 1.6   | 4.8E-3   | 39     |
| 300   | 36       | MF   | protein heterodimerization activity                                 | 1.9   | 4.9E-3   | 22     |
| 301   | 37       | MF   | organic acid binding                                                | 10.6  | 5.6E-3   | 4      |
| 302   | 38       | MF   | transcription factor binding                                        | 2.8   | 5.7E-3   | 11     |
| 303   | 39       | MF   | 3'-5' DNA helicase activity                                         | 9.8   | 7.0E-3   | 4      |
| 304   | 40       | MF   | chromatin binding                                                   | 1.7   | 7.0E-3   | 28     |
| 305   | 41       | MF   | CXCR3 chemokine receptor binding                                    | 20.7  | 7.9E-3   | 3      |
| 306   | 42       | MF   | enzyme binding                                                      | 1.8   | 8.9E-3   | 24     |
| 307   | 43       | MF   | interleukin-1 receptor binding                                      | 8.6   | 1.0E-2   | 4      |
| 308   | 44       | MF   | kinetochore binding                                                 | 17.2  | 1.2E-2   | 3      |
| 309   | 45       | MF   | tumor necrosis factor receptor binding                              | 5.2   | 1.5E-2   | 5      |

| Ali g | Sublis t | Ca t | Term                                               | Fold | P-Value | Count |
|-------|----------|------|----------------------------------------------------|------|---------|-------|
| 310   | 46       | MF   | protein binding                                    | 1.2  | 1.5E-2  | 183   |
| 311   | 47       | MF   | helicase activity                                  | 2.6  | 1.6E-2  | 10    |
| 312   | 48       | MF   | bubble DNA binding                                 | 14.8 | 1.6E-2  | 3     |
| 313   | 49       | MF   | tumor necrosis factor receptor superfamily binding | 14.8 | 1.6E-2  | 3     |
| 314   | 50       | MF   | CCR1 chemokine receptor binding                    | 14.8 | 1.6E-2  | 3     |
| 315   | 51       | MF   | magnesium ion binding                              | 2.0  | 2.3E-2  | 14    |
| 316   | 52       | MF   | glycine transmembrane transporter activity         | 11.5 | 2.6E-2  | 3     |
| 317   | 53       | MF   | DNA polymerase binding                             | 5.7  | 3.1E-2  | 4     |
| 318   | 54       | MF   | hemoglobin binding                                 | 10.3 | 3.2E-2  | 3     |
| 319   | 55       | MF   | receptor agonist activity                          | 2.8  | 3.7E-2  | 7     |
| 320   | 56       | MF   | monooxygenase activity                             | 2.5  | 3.8E-2  | 8     |
| 321   | 57       | MF   | DNA-(apurinic or apyrimidinic site) lyase activity | 9.4  | 3.9E-2  | 3     |
| 322   | 58       | MF   | transferase activity                               | 1.3  | 4.4E-2  | 65    |
| 323   | 59       | MF   | lyase activity                                     | 2.1  | 4.5E-2  | 10    |
| 324   | 60       | MF   | kinase activity                                    | 1.5  | 4.7E-2  | 28    |
| 325   | 61       | MF   | iron-sulfur cluster binding                        | 3.0  | 5.0E-2  | 6     |
| 326   | 62       | MF   | damaged DNA binding                                | 3.0  | 5.0E-2  | 6     |

### Supplementary Table S4B

| Ali g n | Sublis t | Categor y | Term                                                                    | Fold | P-Value | Count |
|---------|----------|-----------|-------------------------------------------------------------------------|------|---------|-------|
| 1       | 1        | BP        | immune response                                                         | 8.0  | 1.6E-18 | 31    |
| 2       | 2        | BP        | inflammatory response                                                   | 7.3  | 2.2E-13 | 24    |
| 3       | 3        | BP        | defense response to virus                                               | 9.7  | 2.3E-13 | 20    |
| 4       | 4        | BP        | chemokine-mediated signaling pathway                                    | 28.3 | 3.3E-13 | 12    |
| 5       | 5        | BP        | chemotaxis                                                              | 14.3 | 3.8E-13 | 16    |
| 6       | 6        | BP        | positive regulation of interleukin-1 beta production                    | 22.4 | 4.6E-13 | 13    |
| 7       | 7        | BP        | neutrophil chemotaxis                                                   | 17.9 | 6.1E-11 | 12    |
| 8       | 8        | BP        | negative regulation of viral genome replication                         | 21.1 | 9.3E-10 | 10    |
| 9       | 9        | BP        | negative regulation of cysteine-type endopeptidase activity             | 50.4 | 3.0E-9  | 7     |
| 10      | 10       | BP        | monocyte differentiation                                                | 32.6 | 3.6E-9  | 8     |
| 11      | 11       | BP        | immune system process                                                   | 4.9  | 4.5E-9  | 22    |
| 12      | 12       | BP        | cellular response to ionizing radiation                                 | 20.8 | 1.0E-8  | 9     |
| 13      | 13       | BP        | positive regulation of T cell proliferation                             | 16.1 | 1.1E-8  | 10    |
| 14      | 14       | BP        | activation of cysteine-type endopeptidase activity                      | 34.3 | 4.1E-8  | 7     |
| 15      | 15       | BP        | intrinsic apoptotic signaling pathway by p53 class mediator             | 23.3 | 4.3E-8  | 8     |
| 16      | 16       | BP        | negative regulation of gene expression, epigenetic                      | 19.6 | 1.5E-7  | 8     |
| 17      | 17       | BP        | positive regulation of cytosolic calcium ion concentration              | 8.3  | 2.2E-7  | 12    |
| 18      | 18       | BP        | negative regulation of innate immune response                           | 18.5 | 2.3E-7  | 8     |
| 19      | 19       | BP        | activation of innate immune response                                    | 18.1 | 2.6E-7  | 8     |
| 20      | 20       | BP        | cellular response to lipopolysaccharide                                 | 5.9  | 2.7E-7  | 15    |
| 21      | 21       | BP        | positive regulation of tyrosine phosphorylation of STAT protein         | 17.2 | 3.8E-7  | 8     |
| 22      | 22       | BP        | positive regulation of inflammatory response                            | 12.4 | 6.4E-7  | 9     |
| 23      | 23       | BP        | negative regulation of DNA binding                                      | 20.9 | 9.3E-7  | 7     |
| 24      | 24       | BP        | cellular response to interferon-beta                                    | 14.2 | 1.4E-6  | 8     |
| 25      | 25       | BP        | response to virus                                                       | 11.0 | 1.6E-6  | 9     |
| 26      | 26       | BP        | erythrocyte development                                                 | 22.3 | 6.6E-6  | 6     |
| 27      | 27       | BP        | monocyte chemotaxis                                                     | 19.9 | 1.2E-5  | 6     |
| 28      | 28       | BP        | positive regulation of osteoclast differentiation                       | 19.9 | 1.2E-5  | 6     |
| 29      | 29       | BP        | eosinophil chemotaxis                                                   | 30.6 | 1.8E-5  | 5     |
| 30      | 30       | BP        | innate immune response                                                  | 3.8  | 2.3E-5  | 16    |
| 31      | 31       | BP        | antimicrobial humoral immune response mediated by antimicrobial peptide | 7.5  | 2.7E-5  | 9     |
| 32      | 32       | BP        | heme biosynthetic process                                               | 27.8 | 2.7E-5  | 5     |
| 33      | 33       | BP        | cellular response to glucose starvation                                 | 11.0 | 4.1E-5  | 7     |
| 34      | 34       | BP        | cytokine-mediated signaling pathway                                     | 6.9  | 4.8E-5  | 9     |
| 35      | 35       | BP        | killing of cells of other organism                                      | 10.3 | 5.9E-5  | 7     |
| 36      | 36       | BP        | positive regulation of cytokine production                              | 10.2 | 6.3E-5  | 7     |
| 37      | 37       | BP        | positive regulation of monocyte chemotaxis                              | 21.9 | 7.4E-5  | 5     |
| 38      | 38       | BP        | lymphocyte chemotaxis                                                   | 20.4 | 9.7E-5  | 5     |

| Alig<br>n | Sublis<br>t | Categor<br>y | Term                                                                                      | Fold  | P-<br>Value | Coun<br>t |
|-----------|-------------|--------------|-------------------------------------------------------------------------------------------|-------|-------------|-----------|
| 39        | 39          | BP           | hydrogen peroxide catabolic process                                                       | 19.7  | 1.1E-4      | 5         |
| 40        | 40          | BP           | microglial cell activation                                                                | 19.1  | 1.3E-4      | 5         |
| 41        | 41          | BP           | calcium-mediated signaling                                                                | 8.5   | 1.8E-4      | 7         |
| 42        | 42          | BP           | positive regulation of calcidiol 1-monooxygenase activity                                 | 122.4 | 2.0E-4      | 3         |
| 43        | 43          | BP           | positive regulation of interleukin-6 production                                           | 7.6   | 3.2E-4      | 7         |
| 44        | 44          | BP           | positive regulation of interleukin-10 production                                          | 13.6  | 4.8E-4      | 5         |
| 45        | 45          | BP           | cellular response to interferon-gamma                                                     | 7.0   | 4.9E-4      | 7         |
| 46        | 46          | BP           | defense response                                                                          | 6.4   | 8.0E-4      | 7         |
| 47        | 47          | BP           | positive regulation of ERK1 and ERK2 cascade                                              | 4.5   | 9.0E-4      | 9         |
| 48        | 48          | BP           | positive regulation of NF-kappaB transcription factor activity                            | 6.2   | 9.7E-4      | 7         |
| 49        | 49          | BP           | positive regulation of chemokine production                                               | 11.3  | 9.7E-4      | 5         |
| 50        | 50          | BP           | cellular oxidant detoxification                                                           | 19.6  | 1.1E-3      | 4         |
| 51        | 51          | BP           | positive regulation of macrophage chemotaxis                                              | 19.6  | 1.1E-3      | 4         |
| 52        | 52          | BP           | positive regulation of gene expression                                                    | 2.9   | 1.2E-3      | 14        |
| 53        | 53          | BP           | positive regulation of peptidyl-serine phosphorylation                                    | 7.5   | 1.2E-3      | 6         |
| 54        | 54          | BP           | negative regulation of transcription, DNA-templated                                       | 2.7   | 1.3E-3      | 15        |
| 55        | 55          | BP           | positive regulation of fever generation                                                   | 52.5  | 1.3E-3      | 3         |
| 56        | 56          | BP           | positive regulation of MAP kinase activity                                                | 9.6   | 1.8E-3      | 5         |
| 57        | 57          | BP           | positive regulation of cytokine production involved in inflammatory response              | 15.8  | 2.0E-3      | 4         |
| 58        | 58          | BP           | macrophage differentiation                                                                | 15.8  | 2.0E-3      | 4         |
| 59        | 59          | BP           | positive regulation of GTPase activity                                                    | 5.1   | 2.5E-3      | 7         |
| 60        | 60          | BP           | positive regulation of cell adhesion                                                      | 8.5   | 2.8E-3      | 5         |
| 61        | 61          | BP           | positive regulation of release of sequestered calcium ion into cytosol                    | 14.0  | 2.8E-3      | 4         |
| 62        | 62          | BP           | positive regulation of transcription from RNA polymerase II promoter                      | 2.0   | 3.1E-3      | 21        |
| 63        | 63          | BP           | cytoskeleton organization                                                                 | 6.0   | 3.3E-3      | 6         |
| 64        | 64          | BP           | T cell chemotaxis                                                                         | 33.4  | 3.4E-3      | 3         |
| 65        | 65          | BP           | response to lipopolysaccharide                                                            | 4.7   | 3.8E-3      | 7         |
| 66        | 66          | BP           | cellular response to interleukin-1                                                        | 7.6   | 4.3E-3      | 5         |
| 67        | 67          | BP           | regulation of insulin secretion                                                           | 11.9  | 4.5E-3      | 4         |
| 68        | 68          | BP           | positive regulation of cell migration                                                     | 3.9   | 4.6E-3      | 8         |
| 69        | 69          | BP           | negative regulation of interferon-gamma production                                        | 11.4  | 5.1E-3      | 4         |
| 70        | 70          | BP           | cellular response to interleukin-17                                                       | 26.2  | 5.6E-3      | 3         |
| 71        | 71          | BP           | interspecies interaction between organisms                                                | 24.5  | 6.4E-3      | 3         |
| 72        | 72          | BP           | cell chemotaxis                                                                           | 6.6   | 7.0E-3      | 5         |
| 73        | 73          | BP           | positive regulation of membrane protein ectodomain proteolysis                            | 23.0  | 7.3E-3      | 3         |
| 74        | 74          | BP           | cellular response to tumor necrosis factor                                                | 4.9   | 7.4E-3      | 6         |
| 75        | 75          | BP           | positive regulation of interferon-gamma production                                        | 6.4   | 7.8E-3      | 5         |
| 76        | 76          | BP           | tumor necrosis factor-mediated signaling pathway                                          | 9.6   | 8.2E-3      | 4         |
| 77        | 77          | BP           | osteoclast differentiation                                                                | 9.4   | 8.7E-3      | 4         |
| 78        | 78          | BP           | response to bacterium                                                                     | 3.4   | 8.8E-3      | 8         |
| 79        | 79          | BP           | positive regulation of nitric oxide biosynthetic process                                  | 9.2   | 9.1E-3      | 4         |
| 80        | 80          | BP           | negative regulation of interleukin-6 production                                           | 9.1   | 9.6E-3      | 4         |
| 81        | 81          | BP           | negative regulation of cysteine-type endopeptidase activity involved in apoptotic process | 8.9   | 1.0E-2      | 4         |
| 82        | 82          | BP           | extrinsic apoptotic signaling pathway                                                     | 8.7   | 1.1E-2      | 4         |
| 83        | 83          | BP           | negative regulation of transcription from RNA polymerase II promoter                      | 2.0   | 1.1E-2      | 17        |
| 84        | 84          | BP           | positive regulation of myoblast fusion                                                    | 18.4  | 1.1E-2      | 3         |
| 85        | 85          | BP           | positive regulation of interleukin-8 production                                           | 8.2   | 1.3E-2      | 4         |
| 86        | 86          | BP           | negative regulation of cell proliferation                                                 | 2.8   | 1.5E-2      | 9         |
| 87        | 87          | BP           | positive regulation of sequence-specific DNA binding transcription factor activity        | 5.2   | 1.6E-2      | 5         |
| 88        | 88          | BP           | positive regulation of vitamin D biosynthetic process                                     | 122.4 | 1.6E-2      | 2         |
| 89        | 89          | BP           | positive regulation of fever generation by positive regulation of prostaglandin secretion | 122.4 | 1.6E-2      | 2         |
| 90        | 90          | BP           | positive regulation of ERK1 and ERK2 cascade via TNFSF11-mediated signaling               | 122.4 | 1.6E-2      | 2         |
| 91        | 91          | BP           | positive regulation of I-kappaB kinase/NF-kappaB signaling                                | 4.0   | 1.7E-2      | 6         |
| 92        | 92          | BP           | T cell proliferation                                                                      | 7.2   | 1.8E-2      | 4         |
| 93        | 93          | BP           | erythrocyte differentiation                                                               | 6.9   | 2.0E-2      | 4         |
| 94        | 94          | BP           | positive regulation of activated T cell proliferation                                     | 13.6  | 2.0E-2      | 3         |
| 95        | 95          | BP           | I-kappaB kinase/NF-kappaB signaling                                                       | 6.7   | 2.2E-2      | 4         |
| 96        | 96          | BP           | positive regulation of vascular endothelial growth factor production                      | 12.7  | 2.3E-2      | 3         |

| Alig<br>n | Sublis<br>t | Categor<br>y | Term                                                                              | Fold | P-<br>Value | Coun<br>t |
|-----------|-------------|--------------|-----------------------------------------------------------------------------------|------|-------------|-----------|
| 97        | 97          | BP           | positive regulation of bone resorption                                            | 12.7 | 2.3E-2      | 3         |
| 98        | 98          | BP           | negative regulation of thrombin-activated receptor signaling pathway              | 81.6 | 2.4E-2      | 2         |
| 99        | 99          | BP           | inflammatory response to antigenic stimulus                                       | 12.2 | 2.5E-2      | 3         |
| 100       | 100         | BP           | cell-cell signaling                                                               | 6.1  | 2.7E-2      | 4         |
| 101       | 101         | BP           | negative regulation of extrinsic apoptotic signaling pathway in absence of ligand | 11.5 | 2.8E-2      | 3         |
| 102       | 102         | BP           | response to interleukin-1                                                         | 11.1 | 2.9E-2      | 3         |
| 103       | 103         | BP           | positive regulation of protein serine/threonine kinase activity                   | 11.1 | 2.9E-2      | 3         |
| 104       | 104         | BP           | response to interferon-gamma                                                      | 11.1 | 2.9E-2      | 3         |
| 105       | 105         | BP           | positive regulation of cell proliferation                                         | 2.2  | 3.1E-2      | 11        |
| 106       | 106         | BP           | sequestering of triglyceride                                                      | 61.2 | 3.2E-2      | 2         |
| 107       | 107         | BP           | interleukin-6 production                                                          | 10.2 | 3.4E-2      | 3         |
| 108       | 108         | BP           | liver regeneration                                                                | 9.7  | 3.8E-2      | 3         |
| 109       | 109         | BP           | acute-phase response                                                              | 9.4  | 4.0E-2      | 3         |
| 110       | 110         | BP           | fever generation                                                                  | 49.0 | 4.0E-2      | 2         |
| 111       | 111         | BP           | positive regulation of natural killer cell chemotaxis                             | 49.0 | 4.0E-2      | 2         |
| 112       | 112         | BP           | tetrapyrrole biosynthetic process                                                 | 49.0 | 4.0E-2      | 2         |
| 113       | 113         | BP           | positive regulation of nitrogen compound metabolic process                        | 49.0 | 4.0E-2      | 2         |
| 114       | 114         | BP           | positive regulation of hemoglobin biosynthetic process                            | 49.0 | 4.0E-2      | 2         |
| 115       | 115         | BP           | interferon-gamma production                                                       | 9.0  | 4.4E-2      | 3         |
| 116       | 116         | BP           | response to xenobiotic stimulus                                                   | 2.7  | 4.4E-2      | 7         |
| 117       | 117         | BP           | positive regulation of neuron apoptotic process                                   | 5.0  | 4.5E-2      | 4         |
| 118       | 118         | BP           | negative regulation of osteoclast differentiation                                 | 8.7  | 4.6E-2      | 3         |
| 119       | 119         | BP           | TNFSF11-mediated signaling pathway                                                | 40.8 | 4.8E-2      | 2         |
| 120       | 120         | BP           | cytokinesis                                                                       | 40.8 | 4.8E-2      | 2         |
| 121       | 121         | BP           | positive regulation of smooth muscle cell apoptotic process                       | 40.8 | 4.8E-2      | 2         |
| 122       | 122         | BP           | response to fructose                                                              | 40.8 | 4.8E-2      | 2         |
| 123       | 123         | BP           | positive regulation of interleukin-12 production                                  | 8.3  | 5.0E-2      | 3         |
| 124       | 1           | CC           | external side of plasma membrane                                                  | 6.3  | 4.8E-14     | 28        |
| 125       | 2           | CC           | extracellular space                                                               | 2.8  | 1.5E-9      | 43        |
| 126       | 3           | CC           | extracellular region                                                              | 2.6  | 6.5E-8      | 39        |
| 127       | 4           | CC           | cell surface                                                                      | 3.1  | 2.1E-5      | 20        |
| 128       | 5           | CC           | hemoglobin complex                                                                | 38.5 | 1.3E-4      | 4         |
| 129       | 6           | CC           | haptoglobin-hemoglobin complex                                                    | 35.8 | 1.7E-4      | 4         |
| 130       | 7           | CC           | cortical cytoskeleton                                                             | 15.2 | 2.3E-3      | 4         |
| 131       | 8           | CC           | CENP-A containing nucleosome                                                      | 13.4 | 2.1E-2      | 3         |
| 132       | 9           | CC           | cytosol                                                                           | 1.3  | 2.6E-2      | 46        |
| 133       | 10          | CC           | nucleosome                                                                        | 4.1  | 3.5E-2      | 5         |
| 134       | 11          | CC           | actin filament                                                                    | 4.9  | 4.9E-2      | 4         |
| 135       | 12          | CC           | mitochondrial matrix                                                              | 3.0  | 5.1E-2      | 6         |
| 136       | 13          | CC           | endosome                                                                          | 1.9  | 7.3E-2      | 11        |
| 137       | 14          | CC           | cleavage furrow                                                                   | 6.5  | 7.8E-2      | 3         |
| 138       | 15          | CC           | cytoplasmic vesicle                                                               | 1.7  | 8.4E-2      | 12        |
| 139       | 16          | CC           | basolateral plasma membrane                                                       | 2.5  | 9.6E-2      | 6         |
| 140       | 1           | MF           | cytokine activity                                                                 | 12.1 | 5.6E-19     | 25        |
| 141       | 2           | MF           | chemokine activity                                                                | 27.0 | 5.1E-13     | 12        |
| 142       | 3           | MF           | double-stranded DNA binding                                                       | 7.3  | 2.7E-6      | 11        |
| 143       | 4           | MF           | CXCR chemokine receptor binding                                                   | 44.2 | 3.6E-6      | 5         |
| 144       | 5           | MF           | cytokine receptor activity                                                        | 14.1 | 6.4E-5      | 6         |
| 145       | 6           | MF           | identical protein binding                                                         | 2.0  | 1.1E-4      | 35        |
| 146       | 7           | MF           | CCR chemokine receptor binding                                                    | 18.5 | 1.4E-4      | 5         |
| 147       | 8           | MF           | transcription factor binding                                                      | 6.9  | 1.7E-4      | 8         |
| 148       | 9           | MF           | organic acid binding                                                              | 35.3 | 1.7E-4      | 4         |
| 149       | 10          | MF           | haptoglobin binding                                                               | 35.3 | 1.7E-4      | 4         |
| 150       | 11          | MF           | cytokine binding                                                                  | 15.1 | 3.2E-4      | 5         |
| 151       | 12          | MF           | oxygen transporter activity                                                       | 28.7 | 3.3E-4      | 4         |
| 152       | 13          | MF           | peroxidase activity                                                               | 13.7 | 4.7E-4      | 5         |
| 153       | 14          | MF           | CXCR3 chemokine receptor binding                                                  | 68.9 | 7.3E-4      | 3         |
| 154       | 15          | MF           | oxygen binding                                                                    | 17.7 | 1.4E-3      | 4         |
| 155       | 16          | MF           | transmembrane signaling receptor activity                                         | 4.3  | 2.5E-3      | 8         |
| 156       | 17          | MF           | tumor necrosis factor receptor binding                                            | 13.9 | 2.9E-3      | 4         |
| 157       | 18          | MF           | hemoglobin binding                                                                | 34.5 | 3.2E-3      | 3         |
| 158       | 19          | MF           | interleukin-1 receptor binding                                                    | 21.5 | 8.2E-3      | 3         |
| 159       | 20          | MF           | chemokine receptor activity                                                       | 16.4 | 1.4E-2      | 3         |



| Alig<br>n | Sublis<br>t | Categor<br>y | Term                                   | Fold | P-<br>Value | Coun<br>t |
|-----------|-------------|--------------|----------------------------------------|------|-------------|-----------|
| 160       | 21          | MF           | Hsp70 protein binding                  | 7.5  | 1.6E-2      | 4         |
| 161       | 22          | MF           | structural constituent of chromatin    | 5.0  | 1.7E-2      | 5         |
| 162       | 23          | MF           | C-C chemokine binding                  | 14.4 | 1.8E-2      | 3         |
| 163       | 24          | MF           | C-C chemokine receptor activity        | 13.8 | 2.0E-2      | 3         |
| 164       | 25          | MF           | heme binding                           | 3.6  | 2.6E-2      | 6         |
| 165       | 26          | MF           | interleukin-20 binding                 | 76.6 | 2.6E-2      | 2         |
| 166       | 27          | MF           | interleukin-22 receptor activity       | 76.6 | 2.6E-2      | 2         |
| 167       | 28          | MF           | chemokine (C-C motif) ligand 5 binding | 57.4 | 3.4E-2      | 2         |
| 168       | 29          | MF           | hemoglobin beta binding                | 57.4 | 3.4E-2      | 2         |
| 169       | 30          | MF           | polyubiquitin binding                  | 8.6  | 4.7E-2      | 3         |
| 170       | 31          | MF           | cytokine receptor binding              | 8.4  | 4.9E-2      | 3         |

## Supplementary Table S4C

| Alig<br>n | Sublis<br>t | Categor<br>y | Term                                                                    | Fold<br>Enrichment | P-<br>Value | Coun<br>t |
|-----------|-------------|--------------|-------------------------------------------------------------------------|--------------------|-------------|-----------|
| 1         | 1           | BP           | immune response                                                         | 13.8               | 3.6E-20     | 24        |
| 2         | 2           | BP           | defense response to virus                                               | 18.4               | 5.7E-16     | 17        |
| 3         | 3           | BP           | inflammatory response                                                   | 11.5               | 8.8E-13     | 17        |
| 4         | 4           | BP           | innate immune response                                                  | 8.4                | 4.4E-10     | 16        |
| 5         | 5           | BP           | chemokine-mediated signaling pathway                                    | 42.0               | 7.0E-10     | 8         |
| 6         | 6           | BP           | chemotaxis                                                              | 19.9               | 1.6E-9      | 10        |
| 7         | 7           | BP           | positive regulation of T cell proliferation                             | 28.7               | 1.1E-8      | 8         |
| 8         | 8           | BP           | positive regulation of interferon-gamma production                      | 22.7               | 5.5E-8      | 8         |
| 9         | 9           | BP           | cytokine-mediated signaling pathway                                     | 15.5               | 1.1E-7      | 9         |
| 10        | 10          | BP           | positive regulation of interleukin-12 production                        | 37.2               | 5.2E-7      | 6         |
| 11        | 11          | BP           | immune system process                                                   | 6.4                | 6.2E-7      | 13        |
| 12        | 12          | BP           | response to virus                                                       | 19.1               | 1.6E-6      | 7         |
| 13        | 13          | BP           | cellular response to interferon-beta                                    | 23.7               | 5.0E-6      | 6         |
| 14        | 14          | BP           | positive regulation of interleukin-1 beta production                    | 23.1               | 5.8E-6      | 6         |
| 15        | 15          | BP           | neutrophil chemotaxis                                                   | 20.0               | 1.2E-5      | 6         |
| 16        | 16          | BP           | positive regulation of cytokine production                              | 19.5               | 1.3E-5      | 6         |
| 17        | 17          | BP           | antimicrobial humoral immune response mediated by antimicrobial peptide | 13.0               | 1.5E-5      | 7         |
| 18        | 18          | BP           | interspecies interaction between organisms                              | 72.8               | 2.0E-5      | 4         |
| 19        | 19          | BP           | positive regulation of interleukin-10 production                        | 30.3               | 2.1E-5      | 5         |
| 20        | 20          | BP           | response to bacterium                                                   | 7.7                | 7.6E-5      | 8         |
| 21        | 21          | BP           | cellular response to diacyl bacterial lipopeptide                       | 204.7              | 7.7E-5      | 3         |
| 22        | 22          | BP           | cellular response to interferon-gamma                                   | 13.4               | 8.0E-5      | 6         |
| 23        | 23          | BP           | positive regulation of activated T cell proliferation                   | 40.4               | 1.2E-4      | 4         |
| 24        | 24          | BP           | cellular response to lipopolysaccharide                                 | 7.0                | 1.3E-4      | 8         |
| 25        | 25          | BP           | toll-like receptor signaling pathway                                    | 39.0               | 1.4E-4      | 4         |
| 26        | 26          | BP           | positive regulation of defense response to virus by host                | 33.1               | 2.3E-4      | 4         |
| 27        | 27          | BP           | positive regulation of ERK1 and ERK2 cascade                            | 7.8                | 2.6E-4      | 7         |
| 28        | 28          | BP           | positive regulation of inflammatory response                            | 15.3               | 3.0E-4      | 5         |
| 29        | 29          | BP           | interleukin-12-mediated signaling pathway                               | 102.4              | 3.6E-4      | 3         |
| 30        | 30          | BP           | positive regulation of cytosolic calcium ion concentration              | 9.3                | 4.5E-4      | 6         |
| 31        | 31          | BP           | MyD88-dependent toll-like receptor signaling pathway                    | 91.0               | 4.6E-4      | 3         |
| 32        | 32          | BP           | response to molecule of bacterial origin                                | 81.9               | 5.7E-4      | 3         |
| 33        | 33          | BP           | regulation of adaptive immune response                                  | 81.9               | 5.7E-4      | 3         |
| 34        | 34          | BP           | positive regulation of T-helper 1 type immune response                  | 74.4               | 6.9E-4      | 3         |
| 35        | 35          | BP           | positive regulation of interleukin-6 production                         | 12.1               | 7.5E-4      | 5         |
| 36        | 36          | BP           | negative regulation of innate immune response                           | 20.6               | 9.3E-4      | 4         |
| 37        | 37          | BP           | activation of innate immune response                                    | 20.2               | 9.8E-4      | 4         |
| 38        | 38          | BP           | positive regulation of immunoglobulin production                        | 19.5               | 1.1E-3      | 4         |
| 39        | 39          | BP           | negative regulation of viral genome replication                         | 18.8               | 1.2E-3      | 4         |
| 40        | 40          | BP           | negative regulation of inflammatory response                            | 10.3               | 1.4E-3      | 5         |
| 41        | 41          | BP           | defense response                                                        | 10.2               | 1.4E-3      | 5         |
| 42        | 42          | BP           | negative regulation of cysteine-type endopeptidase activity             | 48.2               | 1.7E-3      | 3         |
| 43        | 43          | BP           | negative regulation of interleukin-12 production                        | 43.1               | 2.1E-3      | 3         |
| 44        | 44          | BP           | eosinophil chemotaxis                                                   | 40.9               | 2.3E-3      | 3         |

| Alig<br>n | Sublis<br>t | Categor<br>y | Term                                                                 | Fold<br>Enrichment | P-<br>Value | Coun<br>t |
|-----------|-------------|--------------|----------------------------------------------------------------------|--------------------|-------------|-----------|
| 45        | 45          | BP           | positive regulation of myoblast fusion                               | 40.9               | 2.3E-3      | 3         |
| 46        | 46          | BP           | negative regulation of interleukin-17 production                     | 40.9               | 2.3E-3      | 3         |
| 47        | 47          | BP           | cellular response to interferon-alpha                                | 39.0               | 2.6E-3      | 3         |
| 48        | 48          | BP           | negative regulation of interleukin-10 production                     | 37.2               | 2.8E-3      | 3         |
| 49        | 49          | BP           | cellular response to interleukin-1                                   | 13.5               | 3.2E-3      | 4         |
| 50        | 50          | BP           | killing of cells of other organism                                   | 13.2               | 3.4E-3      | 4         |
| 51        | 51          | BP           | activation of cysteine-type endopeptidase activity                   | 32.8               | 3.7E-3      | 3         |
| 52        | 52          | BP           | lymphocyte chemotaxis                                                | 27.3               | 5.2E-3      | 3         |
| 53        | 53          | BP           | monocyte differentiation                                             | 27.3               | 5.2E-3      | 3         |
| 54        | 54          | BP           | positive regulation of transcription from RNA polymerase II promoter | 2.6                | 5.4E-3      | 12        |
| 55        | 55          | BP           | microglial cell activation                                           | 25.6               | 6.0E-3      | 3         |
| 56        | 56          | BP           | immunoglobulin mediated immune response                              | 6.5                | 6.9E-3      | 5         |
| 57        | 57          | BP           | toll-like receptor TLR6:TLR2 signaling pathway                       | 273.0              | 7.2E-3      | 2         |
| 58        | 58          | BP           | detection of diacyl bacterial lipopeptide                            | 273.0              | 7.2E-3      | 2         |
| 59        | 59          | BP           | monocyte chemotaxis                                                  | 22.1               | 7.9E-3      | 3         |
| 60        | 60          | BP           | negative regulation of DNA binding                                   | 20.0               | 9.6E-3      | 3         |
| 61        | 61          | BP           | interferon-gamma production                                          | 20.0               | 9.6E-3      | 3         |
| 62        | 62          | BP           | intrinsic apoptotic signaling pathway by p53 class mediator          | 19.5               | 1.0E-2      | 3         |
| 63        | 63          | BP           | nitric oxide metabolic process                                       | 182.0              | 1.1E-2      | 2         |
| 64        | 64          | BP           | cellular response to triacyl bacterial lipopeptide                   | 182.0              | 1.1E-2      | 2         |
| 65        | 65          | BP           | response to bacterial lipoprotein                                    | 182.0              | 1.1E-2      | 2         |
| 66        | 66          | BP           | defense response to protozoan                                        | 18.2               | 1.2E-2      | 3         |
| 67        | 67          | BP           | positive regulation of cell migration                                | 5.4                | 1.3E-2      | 5         |
| 68        | 68          | BP           | negative regulation of gene expression, epigenetic                   | 16.4               | 1.4E-2      | 3         |
| 69        | 69          | BP           | defense response to nematode                                         | 136.5              | 1.4E-2      | 2         |
| 70        | 70          | BP           | positive regulation of interferon-beta production                    | 15.7               | 1.5E-2      | 3         |
| 71        | 71          | BP           | positive regulation of interleukin-4 production                      | 15.7               | 1.5E-2      | 3         |
| 72        | 72          | BP           | positive regulation of tumor necrosis factor production              | 7.5                | 1.6E-2      | 4         |
| 73        | 73          | BP           | cellular response to ionizing radiation                              | 15.5               | 1.6E-2      | 3         |
| 74        | 74          | BP           | positive regulation of chemokine production                          | 15.2               | 1.6E-2      | 3         |
| 75        | 75          | BP           | B cell adhesion                                                      | 109.2              | 1.8E-2      | 2         |
| 76        | 76          | BP           | negative regulation of complement-dependent cytotoxicity             | 109.2              | 1.8E-2      | 2         |
| 77        | 77          | BP           | positive regulation of tyrosine phosphorylation of STAT protein      | 14.4               | 1.8E-2      | 3         |
| 78        | 78          | BP           | positive regulation of interleukin-8 production                      | 13.6               | 2.0E-2      | 3         |
| 79        | 79          | BP           | response to glucocorticoid                                           | 13.2               | 2.1E-2      | 3         |
| 80        | 80          | BP           | positive regulation of NK T cell activation                          | 91.0               | 2.1E-2      | 2         |
| 81        | 81          | BP           | regulation of tyrosine phosphorylation of STAT protein               | 78.0               | 2.5E-2      | 2         |
| 82        | 82          | BP           | interleukin-11-mediated signaling pathway                            | 78.0               | 2.5E-2      | 2         |
| 83        | 83          | BP           | negative regulation of regulatory T cell differentiation             | 78.0               | 2.5E-2      | 2         |
| 84        | 84          | BP           | T cell proliferation                                                 | 12.0               | 2.5E-2      | 3         |
| 85        | 85          | BP           | negative regulation of tumor necrosis factor production              | 11.7               | 2.7E-2      | 3         |
| 86        | 86          | BP           | cell surface pattern recognition receptor signaling pathway          | 68.2               | 2.9E-2      | 2         |
| 87        | 87          | BP           | B cell proliferation                                                 | 10.6               | 3.2E-2      | 3         |
| 88        | 88          | BP           | germinal center B cell differentiation                               | 60.7               | 3.2E-2      | 2         |
| 89        | 89          | BP           | cellular response to glucose starvation                              | 10.5               | 3.2E-2      | 3         |
| 90        | 90          | BP           | positive regulation of viral life cycle                              | 54.6               | 3.6E-2      | 2         |
| 91        | 91          | BP           | cellular response to lipoteichoic acid                               | 54.6               | 3.6E-2      | 2         |
| 92        | 92          | BP           | peptidyl-tyrosine phosphorylation                                    | 9.6                | 3.8E-2      | 3         |
| 93        | 93          | BP           | negative regulation of heterotypic cell-cell adhesion                | 49.6               | 3.9E-2      | 2         |
| 94        | 94          | BP           | positive regulation of MHC class II biosynthetic process             | 45.5               | 4.3E-2      | 2         |
| 95        | 95          | BP           | cell chemotaxis                                                      | 8.8                | 4.5E-2      | 3         |
| 96        | 96          | BP           | positive regulation of B cell activation                             | 42.0               | 4.6E-2      | 2         |
| 97        | 97          | BP           | interleukin-10 production                                            | 42.0               | 4.6E-2      | 2         |
| 98        | 1           | CC           | external side of plasma membrane                                     | 12.5               | 5.5E-20     | 25        |
| 99        | 2           | CC           | extracellular region                                                 | 4.1                | 1.0E-10     | 28        |
| 100       | 3           | CC           | extracellular space                                                  | 3.8                | 1.2E-9      | 27        |
| 101       | 4           | CC           | cell surface                                                         | 4.9                | 4.2E-6      | 14        |
| 102       | 5           | CC           | receptor complex                                                     | 9.4                | 9.4E-5      | 7         |
| 103       | 6           | CC           | Toll-like receptor 2-Toll-like receptor 6 protein complex            | 278.4              | 7.1E-3      | 2         |
| 104       | 7           | CC           | interleukin-23 receptor complex                                      | 139.2              | 1.4E-2      | 2         |
| 105       | 8           | CC           | membrane raft                                                        | 4.7                | 5.1E-2      | 4         |
| 106       | 1           | MF           | cytokine activity                                                    | 17.0               | 1.8E-14     | 16        |
| 107       | 2           | MF           | chemokine activity                                                   | 39.7               | 1.0E-9      | 8         |

| Alig<br>n | Sublis<br>t | Categor<br>y | Term                                            | Fold<br>Enrichment | P-<br>Value | Coun<br>t |
|-----------|-------------|--------------|-------------------------------------------------|--------------------|-------------|-----------|
| 108       | 3           | MF           | cytokine receptor activity                      | 36.1               | 3.5E-8      | 7         |
| 109       | 4           | MF           | NAD+ nucleotidase, cyclic ADP-ribose generating | 56.2               | 4.4E-5      | 4         |
| 110       | 5           | MF           | NAD(P)+ nucleosidase activity                   | 56.2               | 4.4E-5      | 4         |
| 111       | 6           | MF           | signaling receptor activity                     | 9.6                | 8.2E-5      | 7         |
| 112       | 7           | MF           | lipopeptide binding                             | 126.5              | 2.2E-4      | 3         |
| 113       | 8           | MF           | cytokine binding                                | 26.6               | 4.3E-4      | 4         |
| 114       | 9           | MF           | cytokine receptor binding                       | 24.7               | 5.4E-4      | 4         |
| 115       | 10          | MF           | CXCR chemokine receptor binding                 | 58.4               | 1.1E-3      | 3         |
| 116       | 11          | MF           | transmembrane signaling receptor activity       | 7.2                | 1.4E-3      | 6         |
| 117       | 12          | MF           | CCR chemokine receptor binding                  | 24.5               | 6.5E-3      | 3         |
| 118       | 13          | MF           | interleukin-23 receptor activity                | 253.0              | 7.8E-3      | 2         |
| 119       | 14          | MF           | diacyl lipopeptide binding                      | 253.0              | 7.8E-3      | 2         |
| 120       | 15          | MF           | interleukin-23 binding                          | 253.0              | 7.8E-3      | 2         |
| 121       | 16          | MF           | interleukin-12 receptor binding                 | 126.5              | 1.6E-2      | 2         |
| 122       | 17          | MF           | growth factor activity                          | 6.7                | 2.2E-2      | 4         |
| 123       | 18          | MF           | lipoteichoic acid binding                       | 72.3               | 2.7E-2      | 2         |
| 124       | 19          | MF           | double-stranded DNA binding                     | 5.9                | 3.0E-2      | 4         |

### Supplementary Table S5A

| Sublist | Term                                                          | Fold Enrichment | P-Value | Count |
|---------|---------------------------------------------------------------|-----------------|---------|-------|
| 1       | Cell cycle                                                    | 8.6             | 1.5E-28 | 44    |
| 2       | Cytokine-cytokine receptor interaction                        | 5.2             | 1.4E-22 | 51    |
| 3       | Viral protein interaction with cytokine and cytokine receptor | 8.0             | 2.7E-15 | 25    |
| 4       | Hematopoietic cell lineage                                    | 5.8             | 8.8E-9  | 18    |
| 5       | Chemokine signaling pathway                                   | 3.9             | 1.7E-8  | 25    |
| 6       | DNA replication                                               | 9.5             | 1.2E-7  | 11    |
| 7       | Oocyte meiosis                                                | 4.0             | 9.7E-6  | 16    |
| 8       | Systemic lupus erythematosus                                  | 3.4             | 3.1E-5  | 17    |
| 9       | Porphyrim metabolism                                          | 6.3             | 6.8E-5  | 9     |
| 10      | Malaria                                                       | 5.3             | 9.2E-5  | 10    |
| 11      | Progesterone-mediated oocyte maturation                       | 3.9             | 2.1E-4  | 12    |
| 12      | p53 signaling pathway                                         | 4.1             | 6.2E-4  | 10    |
| 13      | Inflammatory bowel disease                                    | 4.4             | 9.2E-4  | 9     |
| 14      | Cellular senescence                                           | 2.7             | 9.3E-4  | 16    |
| 15      | Rheumatoid arthritis                                          | 3.5             | 2.2E-3  | 10    |
| 16      | Human T-cell leukemia virus 1 infection                       | 2.2             | 3.3E-3  | 18    |
| 17      | Virion - Human immunodeficiency virus                         | 12.1            | 3.6E-3  | 4     |
| 18      | Neutrophil extracellular trap formation                       | 2.3             | 3.6E-3  | 16    |
| 19      | JAK-STAT signaling pathway                                    | 2.5             | 4.3E-3  | 14    |
| 20      | Epstein-Barr virus infection                                  | 2.1             | 8.5E-3  | 16    |
| 21      | Asthma                                                        | 6.0             | 8.5E-3  | 5     |
| 22      | African trypanosomiasis                                       | 4.7             | 8.7E-3  | 6     |
| 23      | Homologous recombination                                      | 4.4             | 1.1E-2  | 6     |
| 24      | Viral carcinogenesis                                          | 2.0             | 1.8E-2  | 15    |
| 25      | Base excision repair                                          | 3.9             | 1.9E-2  | 6     |
| 26      | Toll-like receptor signaling pathway                          | 2.6             | 2.1E-2  | 9     |
| 27      | Antigen processing and presentation                           | 2.8             | 2.4E-2  | 8     |
| 28      | Motor proteins                                                | 2.0             | 2.9E-2  | 13    |
| 29      | IL-17 signaling pathway                                       | 2.6             | 3.4E-2  | 8     |
| 30      | Tuberculosis                                                  | 2.0             | 3.6E-2  | 12    |
| 31      | Pyrimidine metabolism                                         | 3.2             | 3.7E-2  | 6     |
| 32      | Alcoholism                                                    | 1.9             | 3.9E-2  | 13    |
| 33      | Virion - Flavivirus                                           | 9.1             | 4.1E-2  | 3     |
