# Supplementary material for: Identification of immune-associated genes with altered expression in the spleen of mice enriched with probiotic Lactobacillus species using RNA-seq profiling
Source: PubMed Central journal article supplement (PMC11725755; doi:10.5713/ab.24.0280), 2024-08-26
Supplement: ab-24-0280-Supplementary-Table-5.pdf [file ab-24-0280-Supplementary-Table-5.pdf]

| Alig<br>n | Sublis<br>t | Categor<br>y | Term                                            | Fold<br>Enrichment | P-<br>Value | Coun<br>t |
|-----------|-------------|--------------|-------------------------------------------------|--------------------|-------------|-----------|
| 108       | 3           | MF           | cytokine receptor activity                      | 36.1               | 3.5E-8      | 7         |
| 109       | 4           | MF           | NAD+ nucleotidase, cyclic ADP-ribose generating | 56.2               | 4.4E-5      | 4         |
| 110       | 5           | MF           | NAD(P)+ nucleosidase activity                   | 56.2               | 4.4E-5      | 4         |
| 111       | 6           | MF           | signaling receptor activity                     | 9.6                | 8.2E-5      | 7         |
| 112       | 7           | MF           | lipopeptide binding                             | 126.5              | 2.2E-4      | 3         |
| 113       | 8           | MF           | cytokine binding                                | 26.6               | 4.3E-4      | 4         |
| 114       | 9           | MF           | cytokine receptor binding                       | 24.7               | 5.4E-4      | 4         |
| 115       | 10          | MF           | CXCR chemokine receptor binding                 | 58.4               | 1.1E-3      | 3         |
| 116       | 11          | MF           | transmembrane signaling receptor activity       | 7.2                | 1.4E-3      | 6         |
| 117       | 12          | MF           | CCR chemokine receptor binding                  | 24.5               | 6.5E-3      | 3         |
| 118       | 13          | MF           | interleukin-23 receptor activity                | 253.0              | 7.8E-3      | 2         |
| 119       | 14          | MF           | diacyl lipopeptide binding                      | 253.0              | 7.8E-3      | 2         |
| 120       | 15          | MF           | interleukin-23 binding                          | 253.0              | 7.8E-3      | 2         |
| 121       | 16          | MF           | interleukin-12 receptor binding                 | 126.5              | 1.6E-2      | 2         |
| 122       | 17          | MF           | growth factor activity                          | 6.7                | 2.2E-2      | 4         |
| 123       | 18          | MF           | lipoteichoic acid binding                       | 72.3               | 2.7E-2      | 2         |
| 124       | 19          | MF           | double-stranded DNA binding                     | 5.9                | 3.0E-2      | 4         |

### Supplementary Table S5A

| Sublist | Term                                                          | Fold Enrichment | P-Value | Count |
|---------|---------------------------------------------------------------|-----------------|---------|-------|
| 1       | Cell cycle                                                    | 8.6             | 1.5E-28 | 44    |
| 2       | Cytokine-cytokine receptor interaction                        | 5.2             | 1.4E-22 | 51    |
| 3       | Viral protein interaction with cytokine and cytokine receptor | 8.0             | 2.7E-15 | 25    |
| 4       | Hematopoietic cell lineage                                    | 5.8             | 8.8E-9  | 18    |
| 5       | Chemokine signaling pathway                                   | 3.9             | 1.7E-8  | 25    |
| 6       | DNA replication                                               | 9.5             | 1.2E-7  | 11    |
| 7       | Oocyte meiosis                                                | 4.0             | 9.7E-6  | 16    |
| 8       | Systemic lupus erythematosus                                  | 3.4             | 3.1E-5  | 17    |
| 9       | Porphyrim metabolism                                          | 6.3             | 6.8E-5  | 9     |
| 10      | Malaria                                                       | 5.3             | 9.2E-5  | 10    |
| 11      | Progesterone-mediated oocyte maturation                       | 3.9             | 2.1E-4  | 12    |
| 12      | p53 signaling pathway                                         | 4.1             | 6.2E-4  | 10    |
| 13      | Inflammatory bowel disease                                    | 4.4             | 9.2E-4  | 9     |
| 14      | Cellular senescence                                           | 2.7             | 9.3E-4  | 16    |
| 15      | Rheumatoid arthritis                                          | 3.5             | 2.2E-3  | 10    |
| 16      | Human T-cell leukemia virus 1 infection                       | 2.2             | 3.3E-3  | 18    |
| 17      | Virion - Human immunodeficiency virus                         | 12.1            | 3.6E-3  | 4     |
| 18      | Neutrophil extracellular trap formation                       | 2.3             | 3.6E-3  | 16    |
| 19      | JAK-STAT signaling pathway                                    | 2.5             | 4.3E-3  | 14    |
| 20      | Epstein-Barr virus infection                                  | 2.1             | 8.5E-3  | 16    |
| 21      | Asthma                                                        | 6.0             | 8.5E-3  | 5     |
| 22      | African trypanosomiasis                                       | 4.7             | 8.7E-3  | 6     |
| 23      | Homologous recombination                                      | 4.4             | 1.1E-2  | 6     |
| 24      | Viral carcinogenesis                                          | 2.0             | 1.8E-2  | 15    |
| 25      | Base excision repair                                          | 3.9             | 1.9E-2  | 6     |
| 26      | Toll-like receptor signaling pathway                          | 2.6             | 2.1E-2  | 9     |
| 27      | Antigen processing and presentation                           | 2.8             | 2.4E-2  | 8     |
| 28      | Motor proteins                                                | 2.0             | 2.9E-2  | 13    |
| 29      | IL-17 signaling pathway                                       | 2.6             | 3.4E-2  | 8     |
| 30      | Tuberculosis                                                  | 2.0             | 3.6E-2  | 12    |
| 31      | Pyrimidine metabolism                                         | 3.2             | 3.7E-2  | 6     |
| 32      | Alcoholism                                                    | 1.9             | 3.9E-2  | 13    |
| 33      | Virion - Flavivirus                                           | 9.1             | 4.1E-2  | 3     |

| Sublist | Term                           | Fold Enrichment | P-Value | Count |
|---------|--------------------------------|-----------------|---------|-------|
| 34      | Glycerophospholipid metabolism | 2.5             | 4.3E-2  | 8     |
| 35      | Allograft rejection            | 3.0             | 4.7E-2  | 6     |
| 36      | Graft-versus-host disease      | 3.0             | 4.7E-2  | 6     |

### Supplementary Table S5B

| Sublist | Term                                                          | Count | P-Value | Fold Enrichment |
|---------|---------------------------------------------------------------|-------|---------|-----------------|
| 1       | Cytokine-cytokine receptor interaction                        | 38    | 4.1E-32 | 13.0            |
| 2       | Viral protein interaction with cytokine and cytokine receptor | 18    | 2.2E-17 | 19.1            |
| 3       | Chemokine signaling pathway                                   | 15    | 4.5E-9  | 7.9             |
| 4       | IL-17 signaling pathway                                       | 10    | 2.8E-7  | 10.8            |
| 5       | JAK-STAT signaling pathway                                    | 12    | 8.2E-7  | 7.1             |
| 6       | Rheumatoid arthritis                                          | 9     | 2.0E-6  | 10.4            |
| 7       | Hematopoietic cell lineage                                    | 9     | 3.6E-6  | 9.6             |
| 8       | Toll-like receptor signaling pathway                          | 9     | 7.6E-6  | 8.7             |
| 9       | Malaria                                                       | 7     | 1.9E-5  | 12.4            |
| 10      | Inflammatory bowel disease                                    | 7     | 3.0E-5  | 11.4            |
| 11      | African trypanosomiasis                                       | 6     | 3.6E-5  | 15.5            |
| 12      | Th17 cell differentiation                                     | 6     | 3.7E-3  | 5.8             |
| 13      | Virion - Human immunodeficiency virus                         | 3     | 4.1E-3  | 30.2            |
| 14      | Kaposi sarcoma-associated herpesvirus infection               | 8     | 6.0E-3  | 3.6             |
| 15      | Cytosolic DNA-sensing pathway                                 | 5     | 8.5E-3  | 6.1             |
| 16      | Chagas disease                                                | 5     | 1.8E-2  | 4.9             |
| 17      | NF-kappa B signaling pathway                                  | 5     | 2.0E-2  | 4.8             |
| 18      | Amoebiasis                                                    | 5     | 2.1E-2  | 4.7             |
| 19      | C-type lectin receptor signaling pathway                      | 5     | 2.4E-2  | 4.5             |
| 20      | TNF signaling pathway                                         | 5     | 2.6E-2  | 4.4             |
| 21      | Leishmaniasis                                                 | 4     | 3.1E-2  | 5.8             |
| 22      | Tuberculosis                                                  | 6     | 3.2E-2  | 3.4             |
| 23      | Antifolate resistance                                         | 3     | 3.3E-2  | 10.4            |
| 24      | Osteoclast differentiation                                    | 5     | 4.4E-2  | 3.7             |

### Supplementary Table S5C

| Sublist | Term                                                          | Fold Enrichment | P-Value | Count |
|---------|---------------------------------------------------------------|-----------------|---------|-------|
| 1       | Cytokine-cytokine receptor interaction                        | 17.7            | 3.3E-28 | 28    |
| 2       | JAK-STAT signaling pathway                                    | 14.1            | 5.5E-11 | 13    |
| 3       | Viral protein interaction with cytokine and cytokine receptor | 19.5            | 1.3E-9  | 10    |
| 4       | Inflammatory bowel disease                                    | 23.9            | 2.9E-8  | 8     |
| 5       | Chemokine signaling pathway                                   | 8.7             | 6.4E-6  | 9     |
| 6       | Hematopoietic cell lineage                                    | 13.8            | 9.1E-6  | 7     |
| 7       | Toll-like receptor signaling pathway                          | 12.5            | 1.6E-5  | 7     |
| 8       | Amoebiasis                                                    | 12.1            | 1.9E-5  | 7     |
| 9       | Tuberculosis                                                  | 8.2             | 4.0E-5  | 8     |
| 10      | Legionellosis                                                 | 15.5            | 2.7E-4  | 5     |
| 11      | C-type lectin receptor signaling pathway                      | 9.9             | 2.9E-4  | 6     |
| 12      | Lipid and atherosclerosis                                     | 6.0             | 9.1E-4  | 7     |
| 13      | Measles                                                       | 7.7             | 9.6E-4  | 6     |
| 14      | Virion - Human immunodeficiency virus                         | 55.7            | 1.2E-3  | 3     |
| 15      | Virion - Flavivirus                                           | 55.7            | 1.2E-3  | 3     |

| <b>Sublist</b> | <b>Term</b>                                     | <b>Fold Enrichment</b> | <b>P-Value</b> | <b>Count</b> |
|----------------|-------------------------------------------------|------------------------|----------------|--------------|
| 16             | Phagosome                                       | 6.2                    | 2.4E-3         | 6            |
| 17             | Leishmaniasis                                   | 10.6                   | 5.9E-3         | 4            |
| 18             | Kaposi sarcoma-associated herpesvirus infection | 5.0                    | 6.0E-3         | 6            |
| 19             | Asthma                                          | 22.3                   | 7.6E-3         | 3            |
| 20             | Rheumatoid arthritis                            | 8.5                    | 1.1E-2         | 4            |
| 21             | Th1 and Th2 cell differentiation                | 8.4                    | 1.1E-2         | 4            |
| 22             | Chagas disease                                  | 7.2                    | 1.7E-2         | 4            |
| 23             | Th17 cell differentiation                       | 7.1                    | 1.8E-2         | 4            |
| 24             | Intestinal immune network for IgA production    | 12.9                   | 2.2E-2         | 3            |
| 25             | Alcoholic liver disease                         | 5.3                    | 3.8E-2         | 4            |
| 26             | Allograft rejection                             | 9.3                    | 4.0E-2         | 3            |
